# Supplementary material for: A nickel-mediated oxidative α-C(sp3)–H functionalization of amides with allylic alcohols terminated by radical 1,2-aryl migration
Source: Royal Society of Chemistry journal article supplement (doi:10.1039/c4cc08797f), 2014-11-19

# Nickel-Mediated Oxidative $\alpha$ -C(sp<sup>3</sup>)-H Functionalization of Amides with Allylic Alcohols Terminated by Radical 1,2-Aryl Migration

Ren-Jie Song,<sup>ac</sup> Yong-Qiang Tu,<sup>\*ab</sup> Dao-Yong Zhu,<sup>a</sup> Fu-Min Zhang,<sup>a</sup> and Shao-Hua Wang<sup>a</sup>

<sup>a</sup>State Key Laboratory of Applied Organic Chemistry, Lanzhu University, 730000 (P. R. China),

<sup>b</sup>Collaborative Innovation Center of Chemical Science and Engineering, Tianjin, P. R. China.  
300000 (P. R. China) and State Key Laboratory of Chemo/Biosensing and Chemometrics, <sup>c</sup>College  
of Chemistry and Chemical Engineering, Hunan University, Changsha 410082, China

[tuyq@lzu.edu.cn](mailto:tuyq@lzu.edu.cn)

## Supporting Information

### List of Contents

|                                    |         |
|------------------------------------|---------|
| (A) Typical experimental procedure | S2      |
| (B) Analytical data                | S2-S16  |
| (C) Reference                      | S16     |
| (D) Spectra                        | S17-S79 |

## (A) Typical experimental procedure

### (a) General Considerations:

The  $^1\text{H}$ ,  $^{13}\text{C}$  and  $^{19}\text{F}$  NMR spectra were recorded in  $\text{CDCl}_3$  solvent on a 400 MHz NMR spectrometer. Melting points are uncorrected. IR spectra were recorded with a FTIR spectrophotometer by using KBr optics. Mass spectra (MS) were measured on spectrometer by direct inlet at 70 eV with EI ion source and signals were given in  $m/z$  with relative intensity (%) in brackets. HRMS was measured on an electrospray ionization (ESI) apparatus using time-of-flight (TOF) mass spectrometry.

**(b) Typical Procedures for the Synthesis of Substrates 1: All of compounds 1 were synthesized according to the literature.<sup>[1]</sup>**

### (c) Typical Experimental Procedure for the Nickel-Catalyzed Oxidative $\text{C}(\text{sp}^3)\text{-H}$ Functionalization of Amides with $\alpha,\alpha$ -Diaryl Allylic Alcohols *via* Radical 1,2-Aryl Migration:

Allylic alcohol **1** (0.2 mmol),  $N,N$ -substituted amides **2** (1 mL), DTBP (di-*tert*-butyl peroxide) (0.6 mmol) was stirred at 150 °C (oil bath temperature) under air for the indicated time until complete consumption of starting material as monitored by TLC and GC-MS analysis. After the reaction was finished, the reaction mixture was diluted in  $\text{Et}_2\text{O}$ , and washed with brine. The aqueous phase was re-extracted with diethyl ether. The combined organic extracts were dried over  $\text{Na}_2\text{SO}_4$  and concentrated in vacuum, and the resulting residue was purified by silica gel column chromatography (hexane/ethyl acetate) to afford the product.

## (B) Analytical data for 3 and 4

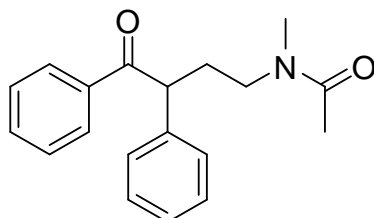

### ***N*-Methyl-*N*-(4-oxo-3,4-diphenylbutyl)acetamide (3aa):**

Colorless liquid;  $^1\text{H}$  NMR (400 MHz,  $\text{CDCl}_3$ )  $\delta$ : 7.96-7.93 (m, 2H), 7.50-7.44 (m, 1H), 7.40-7.35 (m, 2H), 7.32-7.20 (m, 4H), 7.17 (t,  $J = 7.2$  Hz, 1H), 4.68-4.50 (m, 1H), 3.56-3.22 (m, 2H), 2.89 (d,

$J = 9.2$  Hz, 3H), 2.57-2.42 (m, 1H), 2.11-1.89 (m, 4H);  $^{13}\text{C}$  NMR (100 MHz,  $\text{CDCl}_3$ )  $\delta$ : 199.1, 198.5, 170.7, 170.4, 139.2, 138.6, 136.3, 136.1, 133.1, 132.8, 129.2, 128.9, 128.6 (2C), 128.4, 128.0, 127.9, 127.4, 127.0, 51.1, 50.7, 48.8, 45.8, 35.8, 33.0, 32.3, 31.5, 21.6, 20.9; IR (KBr,  $\text{cm}^{-1}$ ): 1679, 1639, 1598, 1492; LRMS (EI, 70 eV)  $m/z$  (%): 295 ( $\text{M}^+$ , 4), 222 (17), 196 (27), 105 (100); HRMS  $m/z$  (ESI) calcd for  $\text{C}_{19}\text{H}_{22}\text{NO}_2$  ( $[\text{M}+\text{H}]^+$ ) 296.1645, found 296.1640.

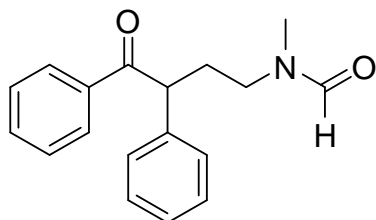

***N*-Methyl-*N*-(4-oxo-3,4-diphenylbutyl)formamide (3ab):**

Colorless liquid;  $^1\text{H}$  NMR (400 MHz,  $\text{CDCl}_3$ )  $\delta$ : 7.94-7.90 (m, 3H), 7.51-7.45 (m, 1H), 7.41-7.30 (m, 2H), 7.29-7.23 (m, 3H), 7.23-7.18 (m, 1H), 4.64-4.49 (m, 1H), 3.47-3.20 (m, 2H), 2.88 (d,  $J = 8.0$  Hz, 3H), 2.55-2.43 (m, 1H), 2.13-1.97 (m, 1H);  $^{13}\text{C}$  NMR (100 MHz,  $\text{CDCl}_3$ )  $\delta$ : 199.0, 198.6, 162.7 (2C), 139.0, 138.2, 136.4, 136.1, 133.2, 133.0, 129.3, 129.1, 128.7 (2C), 128.6, 128.5, 128.1 (2C), 127.6, 127.2, 51.3, 50.2, 47.4, 42.7, 34.4, 31.8, 30.9, 29.4; IR (KBr,  $\text{cm}^{-1}$ ): 1680, 1644, 1493, 1449; LRMS (EI, 70 eV)  $m/z$  (%): 281 ( $\text{M}^+$ , 5), 236 (27), 105 (100); HRMS  $m/z$  (ESI) calcd for  $\text{C}_{18}\text{H}_{19}\text{NNaO}_2$  ( $[\text{M}+\text{Na}]^+$ ) 304.1308, found 304.1301.

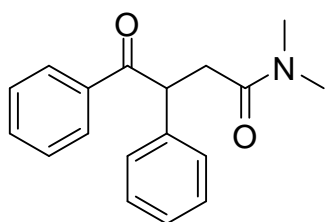

***N,N*-Dimethyl-4-oxo-3,4-diphenylbutanamide (3ab'):**

White solid, mp 112.2-113.1  $^\circ\text{C}$  (uncorrected);  $^1\text{H}$  NMR (400 MHz,  $\text{CDCl}_3$ )  $\delta$ : 8.01 (d,  $J = 8.4$  Hz, 2H), 7.45 (t,  $J = 7.2$  Hz, 1H), 7.38-7.28 (m, 6H), 7.20 (t,  $J = 7.2$  Hz, 1H), 5.25 (dd,  $J = 10.4$  Hz, 4.0 Hz, 1H), 3.52 (dd,  $J = 16.4$  Hz, 10.4 Hz, 1H), 3.01 (s, 3H), 2.91 (s, 3H), 2.63 (dd,  $J = 16.4$  Hz, 3.6 Hz, 1H);  $^{13}\text{C}$  NMR (100 MHz,  $\text{CDCl}_3$ )  $\delta$ : 199.5, 171.0, 138.7, 136.6, 132.7, 129.0, 128.9, 128.4, 128.2, 127.2, 49.5, 38.6, 37.1, 35.4; IR (KBr,  $\text{cm}^{-1}$ ): 1682, 1646, 1494, 1449; LRMS (EI, 70 eV)  $m/z$

(%): 281 ( $M^+$ , 5), 236 (28), 105 (100); HRMS  $m/z$  (ESI) calcd for  $C_{18}H_{19}NNaO_2$  ( $[M+Na]^+$ ) 304.1303, found 304.1301.

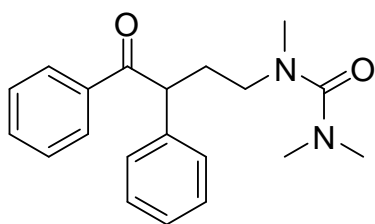

**1,1,3-Trimethyl-3-(4-oxo-3,4-diphenylbutyl)urea (3ac):**

Colorless liquid;  $^1H$  NMR (400 MHz,  $CDCl_3$ )  $\delta$ : 7.94 (d,  $J = 8.8$  Hz, 2H), 7.49-7.45 (m, 1H), 7.38 (t,  $J = 7.6$  Hz, 2H), 7.30-7.25 (m, 4H), 7.21-7.17 (m, 1H), 4.57 (t,  $J = 7.2$  Hz, 1H), 3.27-3.10 (m, 2H), 2.78 (s, 3H), 2.62 (s, 6H), 2.53-2.45 (m, 1H), 2.08-2.00 (m, 1H);  $^{13}C$  NMR (100 MHz,  $CDCl_3$ )  $\delta$ : 199.2, 165.3, 139.3, 136.6, 132.9, 129.0, 128.7, 128.5, 128.1, 127.1, 51.1, 48.7, 38.5, 36.4, 31.8; IR (KBr,  $cm^{-1}$ ): 1680, 1636, 1495, 1385; LRMS (EI, 70 eV)  $m/z$  (%): 324 ( $M^+$ , 1), 280 (2), 252 (2), 196 (26), 129 (100); HRMS  $m/z$  (ESI) calcd for  $C_{20}H_{25}N_2O_2$  ( $[M+H]^+$ ) 325.1911, found 325.1902.

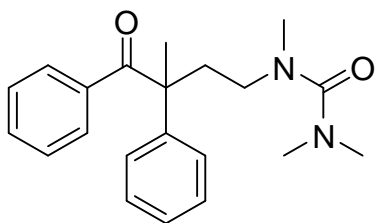

**1,1,3-Trimethyl-3-(3-methyl-4-oxo-3,4-diphenylbutyl)urea (3gc):**

Colorless liquid;  $^1H$  NMR (400 MHz,  $CDCl_3$ )  $\delta$ : 7.49 (d,  $J = 8.4$  Hz, 2H), 7.43-7.41 (m, 6H), 7.26 (t,  $J = 7.6$  Hz, 2H), 3.12-2.96 (m, 2H), 2.70 (s, 9H), 2.39-2.30 (m, 2H), 1.69 (s, 3H);  $^{13}C$  NMR (100 MHz,  $CDCl_3$ )  $\delta$ : 203.1, 165.3, 143.4, 136.4, 131.7, 129.5, 129.0, 128.0, 127.0, 126.1, 53.5, 46.6, 38.5, 37.3, 36.3, 23.7; IR (KBr,  $cm^{-1}$ ): 1674, 1644, 1599, 1507; LRMS (EI, 70 eV)  $m/z$  (%): 338 ( $M^+$ , 1), 294 (1), 210 (20), 129 (89), 115 (100); HRMS  $m/z$  (ESI) calcd for  $C_{21}H_{27}N_2O_2$  ( $[M+H]^+$ ) 339.2067, found 339.2060.

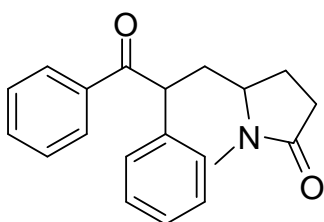



**1-Methyl-5-(3-oxo-2,3-diphenylpropyl)pyrrolidin-2-one (3ad):**

Colorless liquid;  $^1\text{H}$  NMR (400 MHz,  $\text{CDCl}_3$ )  $\delta$ : 8.02-7.99 (m, 2H), 7.47-7.21 (m, 7H), 7.21-7.18 (m, 1H), 5.41-5.30 (m, 1H), 3.27-3.18 (m, 2H), 2.82, 2.66 (s, 3H), 2.39-2.07 (m, 4H), 1.71-1.58 (m, 1H);  $^{13}\text{C}$  NMR (100 MHz,  $\text{CDCl}_3$ )  $\delta$ : 200.1 (2C), 176.7, 176.6, 139.5, 139.1, 137.0, 136.5, 132.8, 132.7, 128.9 (3C), 128.8 (2C), 128.5, 128.4, 128.3, 128.2, 127.0, 50.7, 50.2, 47.5, 39.3, 38.0, 36.5, 36.0, 29.6 (2C), 26.0, 25.9; IR (KBr,  $\text{cm}^{-1}$ ): 1680, 1597, 1579, 1492; LRMS (EI, 70 eV)  $m/z$  (%): 307 ( $\text{M}^+$ , 1), 196 (92), 98 (100); HRMS  $m/z$  (ESI) calcd for  $\text{C}_{20}\text{H}_{22}\text{NO}_2$  ( $[\text{M}+\text{H}]^+$ ) 308.1645, found 308.1635.

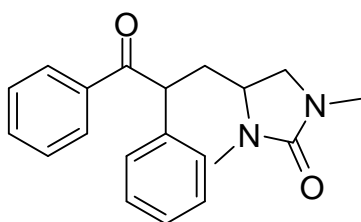**1,3-Dimethyl-4-(3-oxo-2,3-diphenylpropyl)imidazolidin-2-one (3ae):**

Colorless liquid;  $^1\text{H}$  NMR (400 MHz,  $\text{CDCl}_3$ )  $\delta$ : 7.96-7.93 (m, 2H), 7.50 (t,  $J = 7.2$  Hz, 1H), 7.40 (t,  $J = 7.6$  Hz, 2H), 7.32-7.20 (m, 5H), 4.63-4.58 (m, 1H), 3.45-3.40 (m, 1H), 3.38-3.16 (m, 1H), 2.93-2.73 (m, 4H), 2.70, 2.60 (s, 3H), 2.44-1.85 (m, 2H);  $^{13}\text{C}$  NMR (100 MHz,  $\text{CDCl}_3$ )  $\delta$ : 198.5, 161.6, 139.1, 138.3, 136.2 (2C), 133.2, 133.1, 129.2 (2C), 128.6 (2C), 128.1, 127.9, 127.5, 127.4, 126.0, 54.4, 54.1, 51.1, 49.6, 49.1, 36.4, 36.1, 31.1, 31.0, 29.8, 29.4; IR (KBr,  $\text{cm}^{-1}$ ): 1687, 1597, 1498, 1448; LRMS (EI, 70 eV)  $m/z$  (%): 322 ( $\text{M}^+$ , 1), 196 (65), 127 (76), 113 (100); HRMS  $m/z$  (ESI) calcd for  $\text{C}_{20}\text{H}_{23}\text{N}_2\text{O}_2$  ( $[\text{M}+\text{H}]^+$ ) 323.1754, found 323.1743.

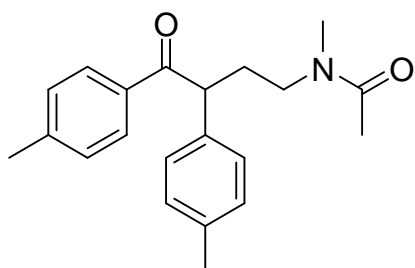**N-Methyl-N-(4-oxo-3,4-dip-tolylbutyl)acetamide (3ba):**

Colorless liquid;  $^1\text{H}$  NMR (500 MHz,  $\text{CDCl}_3$ )  $\delta$ : 7.86-7.83 (m, 2H), 7.19-7.14 (m, 4H), 7.11-7.06 (m, 2H), 4.61-4.43 (m, 1H), 3.56-3.22 (m, 2H), 2.90 (d,  $J = 3.6$  Hz, 3H), 2.53-2.39 (m, 1H), 2.34 (d,

$J = 4.0$  Hz, 3H), 2.77 (d,  $J = 8.4$  Hz, 3H), 2.06-1.90 (m, 4H);  $^{13}\text{C}$  NMR (100 MHz,  $\text{CDCl}_3$ )  $\delta$ : 198.9, 198.3, 170.6, 170.5, 144.0, 143.6, 137.1, 136.6, 136.4, 135.8, 133.9, 133.7, 129.9, 129.6, 129.3, 129.2, 128.8 (2C), 127.9, 127.8, 50.6, 50.1, 48.9, 45.9, 35.8, 33.1, 32.3, 31.4, 21.7, 21.5 (2C), 21.0, 20.9; IR (KBr,  $\text{cm}^{-1}$ ): 1716, 1698, 1683, 1541; LRMS (EI, 70 eV)  $m/z$  (%): 323 ( $\text{M}^+$ , 4), 250 (16), 235 (8), 224 (14), 119 (100); HRMS  $m/z$  (ESI) calcd for  $\text{C}_{21}\text{H}_{26}\text{NO}_2$  ( $[\text{M}+\text{H}]^+$ ) 324.1958, found 324.1948.

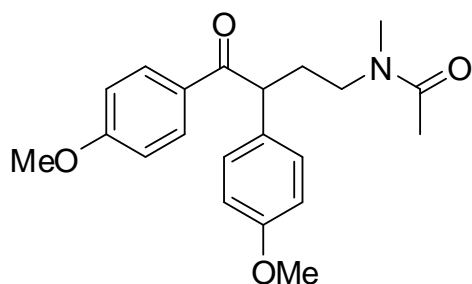

***N*-(3,4-Bis(4-methoxyphenyl)-4-oxobutyl)-*N*-methylacetamide (3ca):**

Colorless liquid;  $^1\text{H}$  NMR (400 MHz,  $\text{CDCl}_3$ )  $\delta$ : 7.95-7.91 (m, 2H), 7.23-7.18 (m, 2H), 6.87-6.79 (m, 4H), 4.58-4.40 (m, 1H), 3.81-3.73 (m, 6H), 3.57-3.20 (m, 2H), 2.89 (d,  $J = 4.8$  Hz, 3H), 2.50-2.39 (m, 1H), 2.06-1.90 (m, 4H);  $^{13}\text{C}$  NMR (100 MHz,  $\text{CDCl}_3$ )  $\delta$ : 197.9, 197.2, 170.6, 170.5, 163.4, 163.2, 158.8, 158.5, 131.6, 131.0 (2C), 129.3, 129.1, 129.0, 128.9, 114.6, 114.3, 113.8, 113.6, 55.4, 55.3, 55.2, 55.1, 49.8, 49.4, 48.8, 45.8, 35.8, 33.0, 32.3, 31.5, 21.6, 21.0; IR (KBr,  $\text{cm}^{-1}$ ): 1669, 1640, 1600, 1510; LRMS (EI, 70 eV)  $m/z$  (%): 355 ( $\text{M}^+$ , 9), 282 (13), 256 (6), 204 (10), 147 (40), 135 (100); HRMS  $m/z$  (ESI) calcd for  $\text{C}_{21}\text{H}_{26}\text{NO}_4$  ( $[\text{M}+\text{H}]^+$ ) 356.1856, found 356.1847.

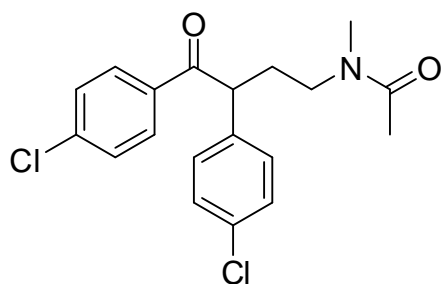

***N*-(3,4-Bis(4-chlorophenyl)-4-oxobutyl)-*N*-methylacetamide (3da):**

Colorless liquid;  $^1\text{H}$  NMR (400 MHz,  $\text{CDCl}_3$ )  $\delta$ : 7.87-7.83 (m, 2H), 7.38-7.35 (m, 2H), 7.31-7.18 (m, 4H), 4.62-4.42 (m, 1H), 3.61-3.20 (m, 2H), 2.90 (s, 3H), 2.56-2.43 (m, 1H), 1.97-1.89 (m, 4H);  $^{13}\text{C}$  NMR (100 MHz,  $\text{CDCl}_3$ )  $\delta$ : 197.6, 197.0, 170.8, 170.4, 140.0, 139.5, 137.5, 136.8, 134.4, 134.1,

133.7, 133.2, 130.1, 130.0, 129.6, 129.3, 129.2, 129.1, 128.9, 50.5, 50.0, 48.6, 45.7, 35.8, 33.1, 32.1, 31.4, 21.6, 21.0; IR (KBr,  $\text{cm}^{-1}$ ): 1681, 1639, 1590, 1490, 1401; LRMS (EI, 70 eV)  $m/z$  (%): 367 ( $\text{M}^++4$ , 0.5), 365 ( $\text{M}^++2$ , 4), 363 ( $\text{M}^+$ , 2.8), 290 (12), 264 (12), 139 (100); HRMS  $m/z$  (ESI) calcd for  $\text{C}_{19}\text{H}_{20}\text{Cl}_2\text{NO}_2$  ( $[\text{M}+\text{H}]^+$ ) 364.0866, found 364.0862.

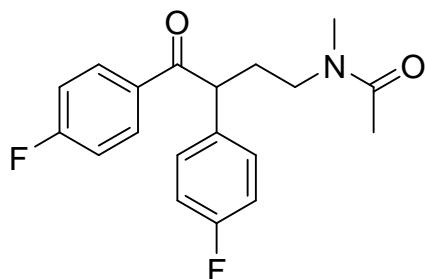

***N*-(3,4-Bis(4-fluorophenyl)-4-oxobutyl)-*N*-methylacetamide (3ea):**

Colorless liquid;  $^1\text{H}$  NMR (400 MHz,  $\text{CDCl}_3$ )  $\delta$ : 7.98-7.93 (m, 2H), 7.29-7.22 (m, 2H), 7.09-7.02 (m, 2H), 6.97 (t,  $J = 8.4$  Hz, 2H), 4.64-4.44 (m, 1H), 3.61-3.21 (m, 2H), 2.90 (s, 3H), 2.56-2.42 (m, 1H), 2.06-1.90 (m, 4H);  $^{13}\text{C}$  NMR (100 MHz,  $\text{CDCl}_3$ )  $\delta$ : 197.5, 196.8, 170.7, 170.4, 166.9, 164.3, 163.1, 160.7, 134.9, 134.8, 134.2, 132.6, 131.4, 131.3, 129.6, 129.5 (2C), 129.4, 116.4, 116.2, 116.0, 115.8, 115.6, 50.3, 49.8, 48.7, 45.7, 35.8, 33.1, 32.4, 31.6, 21.6, 21.0;  $^{19}\text{F}$  NMR (376 MHz,  $\text{CDCl}_3$ )  $\delta$ : -104.2 (s, 1F), -105.0 (s, 1F), -114.2 (s, 1F), -115.2 (s, 1F); IR (KBr,  $\text{cm}^{-1}$ ): 1680, 1638, 1597, 1508; LRMS (EI, 70 eV)  $m/z$  (%): 331 ( $\text{M}^+$ , 5), 258 ( $\text{M}^+$ , 20), 232 (17), 135 (27), 123 (100); HRMS  $m/z$  (ESI) calcd for  $\text{C}_{19}\text{H}_{20}\text{F}_2\text{NO}_2$  ( $[\text{M}+\text{H}]^+$ ) 332.1457, found 332.1460.

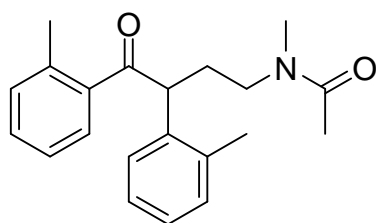

***N*-Methyl-*N*-(4-oxo-3,4-dio-tolylbutyl)acetamide (3fa):**

Colorless liquid;  $^1\text{H}$  NMR (400 MHz,  $\text{CDCl}_3$ )  $\delta$ : 7.50-7.37 (m, 1H), 7.26-7.23 (m, 1H), 7.17-7.07 (m, 6H), 4.71-4.55 (m, 1H), 3.47-3.24 (m, 2H), 2.95 (d,  $J = 11.6$  Hz, 3H), 2.57-2.45 (m, 1H), 2.34-2.26 (m, 6H), 2.06-1.85 (m, 4H);  $^{13}\text{C}$  NMR (100 MHz,  $\text{CDCl}_3$ )  $\delta$ : 203.5, 203.0, 170.7, 170.6, 138.9, 138.3, 138.0, 137.6, 136.8, 136.2, 135.8, 135.4, 131.8, 131.4, 131.1 (2C), 130.9, 130.7, 127.5, 127.4, 127.3, 127.0 (2C), 126.8, 126.4, 125.5, 125.4, 49.9, 48.9 (2C), 46.1, 35.9, 33.1, 31.2, 30.2,

21.8, 21.0, 20.7, 20.4, 19.8 (2C); IR (KBr,  $\text{cm}^{-1}$ ): 1719, 1698, 1681, 1540; LRMS (EI, 70 eV)  $m/z$  (%): 323 ( $\text{M}^+$ , 3), 250 (20), 204 (17), 188 (29), 131 (20), 119 (100); HRMS  $m/z$  (ESI) calcd for  $\text{C}_{21}\text{H}_{26}\text{NO}_2$  ( $[\text{M}+\text{H}]^+$ ) 324.1958, found 324.1948.

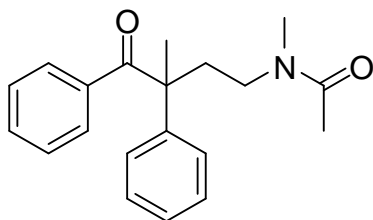

***N*-Methyl-*N*-(3-methyl-4-oxo-3,4-diphenylbutyl)acetamide (3ga):**

Colorless liquid;  $^1\text{H}$  NMR (400 MHz,  $\text{CDCl}_3$ )  $\delta$ : 7.49-7.19 (m, 10H), 3.38-3.05 (m, 2H), 2.80 (d,  $J = 3.6$  Hz, 3H), 2.25-2.20 (m, 2H), 1.96 (s, 1.4H), 1.83 (s, 1.6H), 1.68 (d,  $J = 4.0$  Hz, 3H);  $^{13}\text{C}$  NMR (100 MHz,  $\text{CDCl}_3$ )  $\delta$ : 203.2, 202.5, 170.2, 170.1, 143.2, 142.7, 136.5, 135.9, 132.0, 131.6, 129.5, 129.4, 129.2, 129.0, 128.1, 127.9, 127.4, 127.0, 126.0, 125.9, 53.4, 53.2, 46.9, 43.8, 39.0, 37.0, 35.8, 33.1, 23.6, 23.1, 21.7, 20.6; IR (KBr,  $\text{cm}^{-1}$ ): 1681, 1638, 1596, 1490; LRMS (EI, 70 eV)  $m/z$  (%): 309 ( $\text{M}^+$ , 1), 281 (3), 236 (16), 105 (100); HRMS  $m/z$  (ESI) calcd for  $\text{C}_{20}\text{H}_{24}\text{NO}_2$  ( $[\text{M}+\text{H}]^+$ ) 310.1802, found 310.1795.

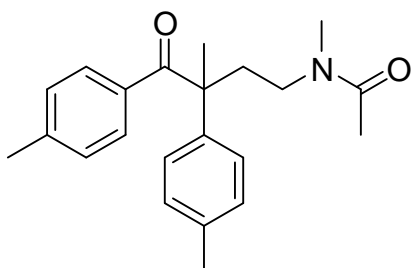

***N*-Methyl-*N*-(3-methyl-4-oxo-3,4-dip-tolylbutyl)acetamide (3ha):**

Colorless liquid;  $^1\text{H}$  NMR (400 MHz,  $\text{CDCl}_3$ )  $\delta$ : 7.43-7.38 (m, 2H), 7.19-7.13 (m, 4H), 7.03 (t,  $J = 8.0$  Hz, 2H), 3.35-3.04 (m, 2H), 2.80 (d,  $J = 2.8$  Hz, 3H), 2.33 (d,  $J = 7.6$  Hz, 3H), 2.30 (d,  $J = 4.8$  Hz, 3H), 2.21-2.16 (m, 2H), 1.97 (s, 1.4H), 1.85 (s, 1.6H), 1.66, 1.65 (s, 3H);  $^{13}\text{C}$  NMR (100 MHz,  $\text{CDCl}_3$ )  $\delta$ : 202.9, 202.2, 170.3, 170.2, 142.8, 142.3, 140.5, 140.0, 137.0, 136.5, 133.7, 133.2, 129.8 (2C), 129.7, 129.6, 128.8, 128.6, 125.9, 125.8, 53.0, 52.8, 47.1, 43.9, 39.1, 37.2, 35.8, 33.1, 23.9, 23.3, 21.8, 21.4 (2C), 21.0, 20.7; IR (KBr,  $\text{cm}^{-1}$ ): 1671, 1647, 1607, 1511; LRMS (EI, 70 eV)  $m/z$

(%): 337 ( $M^+$ , 3), 218 (49), 145 (35), 119 (100); HRMS  $m/z$  (ESI) calcd for  $C_{21}H_{26}NO_2$  ( $[M+H]^+$ ) 338.2103, found 338.2096.

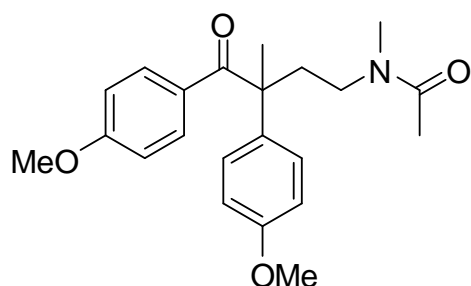

***N*-(3,4-Bis(4-methoxyphenyl)-3-methyl-4-oxobutyl)-*N*-methylacetamide (3ia):**

Colorless liquid;  $^1H$  NMR (400 MHz,  $CDCl_3$ )  $\delta$ : 7.54-7.50 (m, 2H), 7.22-7.17 (m, 2H), 6.92-6.87 (m, 2H), 6.74-6.70 (m, 2H), 3.81-3.76 (m, 6H), 3.34-3.03 (m, 2H), 2.82, 2.80 (s, 3H), 2.20-2.15 (m, 2H), 1.97 (s, 1.4H), 1.86 (s, 1.6H), 1.66, 1.65 (s, 3H);  $^{13}C$  NMR (100 MHz,  $CDCl_3$ )  $\delta$ : 201.7, 201.1, 170.3, 170.1, 162.5, 162.2, 158.6, 158.4, 135.8, 135.3, 132.1, 132.0, 128.8, 128.3, 127.1, 127.0, 114.4, 114.3, 113.2, 113.1, 55.3, 55.2 (3C), 52.5, 52.4, 47.1, 43.9, 39.3, 37.3, 35.9, 33.1, 24.2, 23.7, 21.8, 20.7; IR (KBr,  $cm^{-1}$ ): 1663, 1644, 1601, 1511; LRMS (EI, 70 eV)  $m/z$  (%): 359 ( $M^+$ , 1), 234 (44), 161 (61), 135 (100); HRMS  $m/z$  (ESI) calcd for  $C_{22}H_{28}NO_4$  ( $[M+H]^+$ ) 370.2013, found 370.2007.

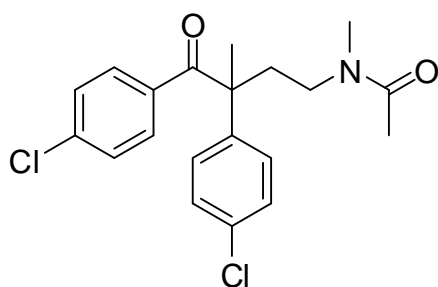

***N*-(3,4-Bis(4-chlorophenyl)-3-methyl-4-oxobutyl)-*N*-methylacetamide (3ja):**

Colorless liquid;  $^1H$  NMR (400 MHz,  $CDCl_3$ )  $\delta$ : 7.44-7.33 (m, 4H), 7.25-7.20 (m, 4H), 3.34-3.10 (m, 2H), 2.83 (d,  $J = 12.8$  Hz, 3H), 2.24-2.13 (m, 2H), 1.97 (s, 1.7H), 1.91 (s, 1.2H), 1.67 (s, 3H);  $^{13}C$  NMR (100 MHz,  $CDCl_3$ )  $\delta$ : 201.2, 200.6, 170.2, 170.1, 141.6, 141.1, 138.7, 138.3, 134.2, 133.6 (2C), 133.2, 131.0, 130.9, 129.5, 129.3, 128.5, 128.4, 127.4, 127.3, 53.0, 52.8, 46.8, 43.7, 39.1, 37.0, 35.9, 33.1, 23.5, 23.1, 21.7, 20.7; IR (KBr,  $cm^{-1}$ ): 1675, 1642, 1607, 1512; LRMS (EI, 70 eV)  $m/z$  (%): 379 ( $M^++2$ , 1.1), 378 (0.5), 377 ( $M^+$ , 1.5), 278 (5), 238 (25), 139 (48), 86 (100); HRMS  $m/z$  (ESI) calcd for  $C_{20}H_{22}Cl_2NO_2$  ( $[M+H]^+$ ) 378.1022, found 378.1021.

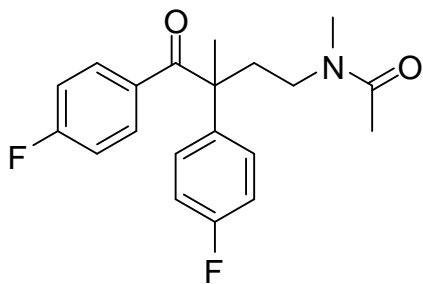

***N*-(3,4-Bis(4-fluorophenyl)-3-methyl-4-oxobutyl)-*N*-methylacetamide (3ka):**

Colorless liquid;  $^1\text{H}$  NMR (400 MHz,  $\text{CDCl}_3$ )  $\delta$ : 7.54-7.47 (m, 2H), 7.29-7.24 (m, 2H), 7.12-7.04 (m, 2H), 6.96-6.89 (m, 2H), 3.35-3.09 (m, 2H), 2.83 (d,  $J = 12.8$  Hz, 3H), 2.24-2.14 (m, 2H), 1.98 (s, 1.5H), 1.89 (s, 1.5H), 1.67 (s, 3H);  $^{13}\text{C}$  NMR (100 MHz,  $\text{CDCl}_3$ )  $\delta$ : 201.2, 200.5, 170.2 (2C), 166.1, 165.9, 163.6, 163.4, 163.2, 163.0, 160.7, 160.6, 139.0 (2C), 138.6 (2C), 132.3 (3C), 132.2, 132.1, 131.7, 127.7, 127.6 (3C), 116.4, 116.2, 116.1, 115.9, 115.4, 115.3, 115.2, 115.0, 52.9, 52.7, 46.9, 43.8, 39.3, 37.2, 35.9, 33.2, 23.8, 23.4, 21.8, 20.7;  $^{19}\text{F}$  NMR (376 MHz,  $\text{CDCl}_3$ )  $\delta$ : -105.6 (s, 1F), -106.3 (s, 1F), -114.3 (m, 1F), -115.1 (s, 1F); IR (KBr,  $\text{cm}^{-1}$ ): 1675, 1644, 1599, 1507; LRMS (EI, 70 eV)  $m/z$  (%): 345 ( $\text{M}^+$ , 2), 246 (13), 222 (33), 149 (29), 123 (68), 86 (100); HRMS  $m/z$  (ESI) calcd for  $\text{C}_{20}\text{H}_{22}\text{F}_2\text{NO}_2$  ( $[\text{M}+\text{H}]^+$ ) 324.1594, found 324.1621.

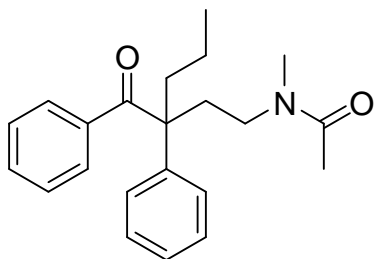

***N*-(3-Benzoyl-3-phenylhexyl)-*N*-methylacetamide (3la):**

Colorless liquid;  $^1\text{H}$  NMR (400 MHz,  $\text{CDCl}_3$ )  $\delta$ : 7.43-7.18 (m, 10H), 3.19-2.85 (m, 2H), 2.74 (s, 1.6H), 2.65 (s, 1.3H), 2.36-2.04 (m, 4H), 1.94 (s, 1.3H), 1.69 (s, 1.6H), 1.29-0.98 (m, 2H), 0.85-0.80 (m, 3H);  $^{13}\text{C}$  NMR (100 MHz,  $\text{CDCl}_3$ )  $\delta$ : 203.4, 202.5, 170.2, 170.1, 142.4, 142.1, 137.0, 136.4, 132.1, 131.6, 129.3, 129.2, 129.1, 128.9, 128.1, 127.9, 127.5, 127.1, 126.7, 126.5, 57.0, 56.8, 46.5, 43.3, 37.1, 36.4, 35.7, 34.1, 33.1, 31.9, 21.8, 20.5, 17.1, 16.9, 14.7 (2C); IR (KBr,  $\text{cm}^{-1}$ ): 1673, 1647, 1492, 1446; LRMS (EI, 70 eV)  $m/z$  (%): 337 ( $\text{M}^+$ , 3), 238 (13), 232 (33), 105 (52), 86 (100); HRMS  $m/z$  (ESI) calcd for  $\text{C}_{22}\text{H}_{28}\text{NO}_2$  ( $[\text{M}+\text{H}]^+$ ) 338.2115, found 338.2114.

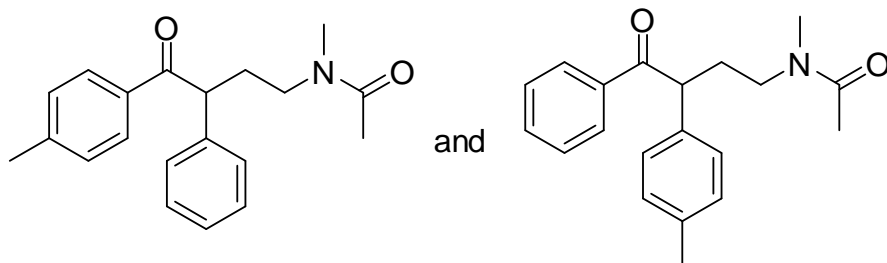

***N*-Methyl-*N*-(4-oxo-3-phenyl-4-*p*-tolylbutyl)acetamide (3ma) and**

***N*-Methyl-*N*-(4-oxo-4-phenyl-3-*p*-tolylbutyl)acetamide (3ma'):**

**3ma:3ma'** = 1.8:1; Colorless liquid;  $^1\text{H}$  NMR (400 MHz,  $\text{CDCl}_3$ )  $\delta$ : 7.95-7.93 (m, 0.7H), 7.86-7.83 (m, 1.3H), 7.48-7.07 (m, 7H), 4.65-4.47 (m, 1H), 3.55-3.22 (m, 2H), 2.90-2.89 (m, 3H), 2.54-2.43 (m, 1H), 2.34 (d,  $J = 4.0$  Hz, 2H), 2.27 (d,  $J = 8.4$  Hz, 1H), 2.05-1.90 (m, 4H);  $^{13}\text{C}$  NMR (100 MHz,  $\text{CDCl}_3$ )  $\delta$ : 199.3, 198.8, 198.7, 198.2, 170.6, 170.5, 144.1, 143.7, 139.5, 138.9, 137.2, 136.7, 136.4, 136.2, 135.6, 133.9, 133.7, 133.1, 132.8, 130.0, 129.6, 129.3, 129.2 (2C), 128.9, 128.8 (2C), 128.7 (2C), 128.6, 128.4, 128.0, 127.9, 127.8, 127.4, 127.0, 51.0, 50.8, 50.5, 50.3, 48.8, 45.9, 35.8, 33.1, 32.3 (2C), 31.5 (2C), 21.6 (2C), 21.5, 21.0, 20.9; IR (KBr,  $\text{cm}^{-1}$ ): 1676, 1641, 1492, 1449; LRMS (EI, 70 eV)  $m/z$  (%): 309 ( $\text{M}^+$ , 12), 236 (63), 210 (27), 131 (77), 105 (100); HRMS  $m/z$  (ESI) calcd for  $\text{C}_{20}\text{H}_{24}\text{NO}_2$  ( $[\text{M}+\text{H}]^+$ ) 310.1802, found 310.1795.

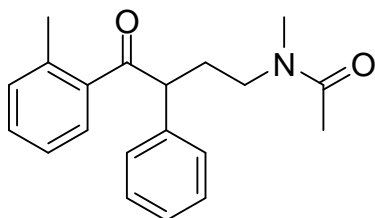

***N*-Methyl-*N*-(4-oxo-3-phenyl-4-*o*-tolylbutyl)acetamide (3na):**

Colorless liquid;  $^1\text{H}$  NMR (400 MHz,  $\text{CDCl}_3$ )  $\delta$ : 7.59-7.53 (m, 1H), 7.31-7.10 (m, 8H), 4.49-4.33 (m, 1H), 3.49-3.20 (m, 2H), 2.92 (s, 3H), 2.56-2.46 (m, 1H), 2.32 (s, 1.3H), 2.26 (s, 1.7H), 2.11-1.94 (m, 4H);  $^{13}\text{C}$  NMR (100 MHz,  $\text{CDCl}_3$ )  $\delta$ : 203.1, 202.5, 170.6, 170.5, 138.4, 138.3 (2C), 137.9, 137.8 (2C), 131.8, 131.5, 131.2, 130.8, 129.1, 128.8, 128.3, 128.1, 128.0, 127.9, 127.5, 127.1, 125.5 (2C), 54.4, 53.5, 48.8, 45.9, 35.9, 33.0, 31.5, 30.4, 21.8, 21.0, 20.8, 20.6; IR (KBr,  $\text{cm}^{-1}$ ): 1675, 1640, 1493; LRMS (EI, 70 eV)  $m/z$  (%): 309 ( $\text{M}^+$ , 1), 236 (9), 221 (3), 210 (5), 190 (4), 174 (15), 119 (100); HRMS  $m/z$  (ESI) calcd for  $\text{C}_{20}\text{H}_{24}\text{NO}_2$  ( $[\text{M}+\text{H}]^+$ ) 310.1802, found 310.1795.

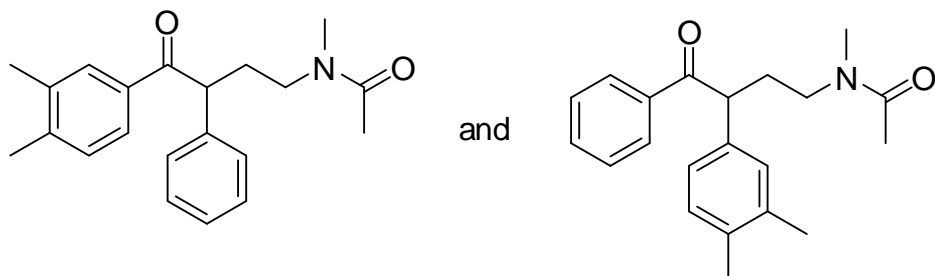

***N*-(4-(3,4-Dimethylphenyl)-4-oxo-3-phenylbutyl)-*N*-methylacetamide (30a) and *N*-(3-(3,4-Dimethylphenyl)-4-oxo-4-phenylbutyl)-*N*-methylacetamide (30a'):**

**30a:30a'** = 2:1; Colorless liquid;  $^1\text{H}$  NMR (400 MHz,  $\text{CDCl}_3$ )  $\delta$ : 7.96-7.65 (m, 2H), 7.46-7.01 (m, 6H), 4.65-4.48 (m, 1H), 3.53-3.22 (m, 2H), 2.90-2.89 (m, 3H), 2.51-2.44 (m, 1H), 2.25-2.17 (m, 6H), 2.06-1.90 (m, 4H);  $^{13}\text{C}$  NMR (100 MHz,  $\text{CDCl}_3$ )  $\delta$ : 199.3, 199.1, 198.7, 198.4, 170.6 (2C), 142.9, 142.5, 139.6, 139.0, 137.6, 137.1, 137.0, 136.8, 134.3, 134.1, 133.1, 132.8, 130.4, 130.1, 129.8, 129.7, 129.2, 129.1, 128.9 (2C), 128.7 (2C), 128.6, 128.4, 128.0, 127.9, 127.3, 126.9, 126.5 (2C), 125.5, 125.4, 51.0, 50.8, 50.4, 50.3, 48.9, 45.9, 35.8, 33.1, 32.3, 31.6, 31.5, 21.7, 21.6, 21.0, 19.9 (2C), 19.7, 19.3 (2C); IR (KBr,  $\text{cm}^{-1}$ ): 1674, 1642, 1493, 1451; LRMS (EI, 70 eV)  $m/z$  (%): 323 ( $\text{M}^+$ , 15), 250 (72), 224 (22), 145 (73), 105 (79), 86 (100); HRMS  $m/z$  (ESI) calcd for  $\text{C}_{21}\text{H}_{26}\text{NO}_2$  ( $[\text{M}+\text{H}]^+$ ) 324.1958, found 324.1951.

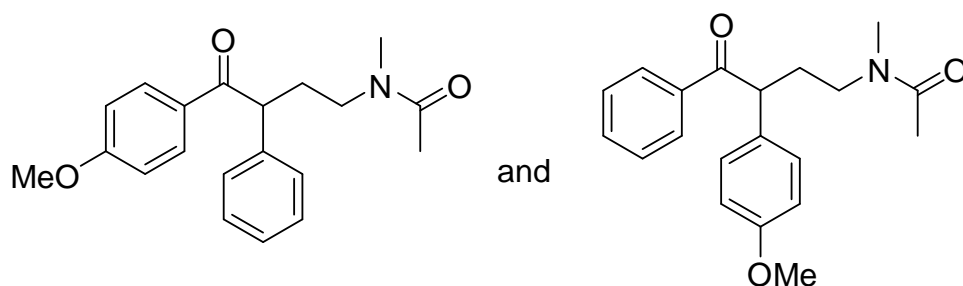

***N*-(4-(4-Methoxyphenyl)-4-oxo-3-phenylbutyl)-*N*-methylacetamide (3pa) and *N*-(3-(4-Methoxyphenyl)-4-oxo-4-phenylbutyl)-*N*-methylacetamide (3pa'):**

**3pa:3pa'** = 5:1; Colorless liquid;  $^1\text{H}$  NMR (400 MHz,  $\text{CDCl}_3$ )  $\delta$ : 7.95-7.92 (m, 2H), 7.37-7.15 (m, 5H), 6.87-6.79 (m, 2H), 4.63-4.45 (m, 1H), 3.81 (d,  $J = 2.4$  Hz, 2.5H), 3.74 (d,  $J = 6.4$  Hz, 0.5H), 3.56-3.23 (m, 2H), 2.90-2.89 (m, 3H), 2.54-2.45 (m, 1H), 2.05-1.89 (m, 4H);  $^{13}\text{C}$  NMR (100 MHz,  $\text{CDCl}_3$ )  $\delta$ : 197.6, 197.0, 170.6, 170.5, 139.7, 139.1, 131.0, 129.4, 129.2, 129.1, 129.0, 128.9, 128.7, 128.6, 128.4, 128.0, 127.8, 127.3, 126.9, 114.7, 114.3, 113.8, 113.7, 55.4, 55.3, 55.1, 50.8, 50.3, 48.9, 45.9, 35.8, 33.0, 32.4, 31.5, 21.6, 21.0; IR (KBr,  $\text{cm}^{-1}$ ): 1663, 1644, 1601, 1511; LRMS (EI, 70



eV)  $m/z$  (%): 325 ( $M^+$ , 2), 252 (8), 226 (26), 174 (18), 135 (100); HRMS  $m/z$  (ESI) calcd for  $C_{20}H_{24}NO_3$  ( $[M+H]^+$ ) 326.1751, found 326.1749.

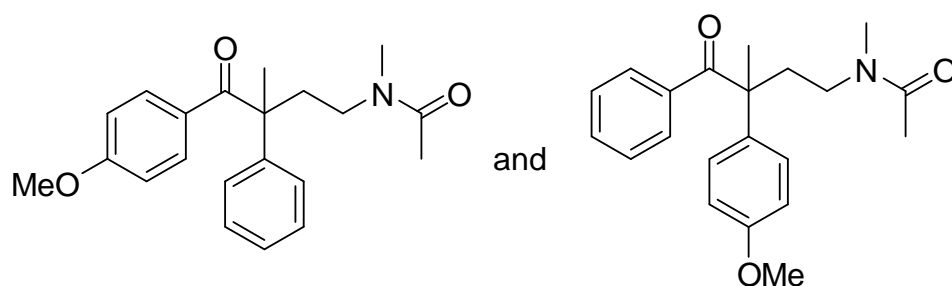

***N*-(4-(4-Methoxyphenyl)-3-methyl-4-oxo-3-phenylbutyl)-*N*-methylacetamide (3qa) and *N*-(3-(4-Methoxyphenyl)-3-methyl-4-oxo-4-phenylbutyl)-*N*-methylacetamide (3qa'):**

**3qa:3qa'** = 6:1; Colorless liquid;  $^1H$  NMR (400 MHz,  $CDCl_3$ )  $\delta$ : 7.55-7.51 (m, 2H), 7.50-7.20 (m, 5H), 6.94-6.91 (m, 0.29H), 6.74-6.69 (m, 1.75H), 3.81 (d,  $J$  = 6.0 Hz, 0.46H), 3.77 (d,  $J$  = 4.8 Hz, 2.65H), 3.33-3.08 (m, 2H), 2.81 (d,  $J$  = 3.2 Hz, 3H), 2.24-2.17 (m, 2H), 1.97 (s, 1.3H), 1.85 (d,  $J$  = 5.2 Hz, 1.7H), 1.69 (d,  $J$  = 5.6 Hz, 2.64H), 1.64 (d,  $J$  = 5.2 Hz, 0.45H);  $^{13}C$  NMR (100 MHz,  $CDCl_3$ )  $\delta$ : 201.4, 200.8, 170.3, 170.2, 162.6, 162.3, 144.0, 143.5, 132.2, 132.0, 129.5, 129.1, 129.0, 128.7, 128.2, 128.1, 128.0, 127.3, 127.2, 127.1, 126.9, 126.0 (2C), 114.6, 114.4, 113.3, 113.2, 55.3 (2C), 53.2, 53.1, 47.1, 43.9, 39.3, 37.3, 35.9, 33.2, 24.2, 23.6, 21.8, 20.7; IR (KBr,  $cm^{-1}$ ): 1666, 1644, 1600, 1461; LRMS (EI, 70 eV)  $m/z$  (%): 339 ( $M^+$ , 1), 337 (3), 238 (10), 218 (43), 145 (38), 119 (100); HRMS  $m/z$  (ESI) calcd for  $C_{21}H_{26}NO_3$  ( $[M+H]^+$ ) 340.1907, found 340.1900.

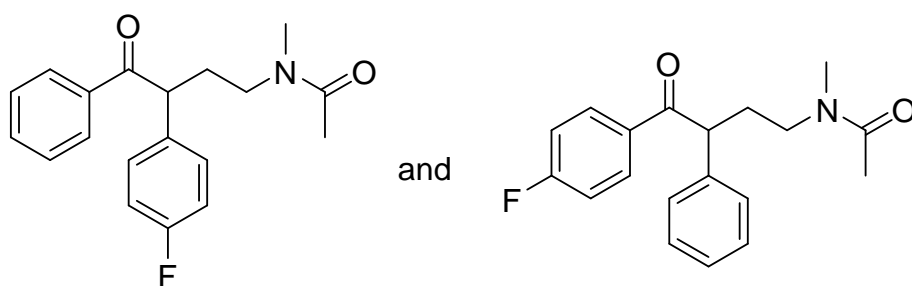

***N*-(3-(4-Fluorophenyl)-4-oxo-4-phenylbutyl)-*N*-methylacetamide (3ra) and *N*-(4-(4-Fluorophenyl)-4-oxo-3-phenylbutyl)-*N*-methylacetamide (3ra'):**

**3ra:3ra'** = 3.2:1; Colorless liquid;  $^1H$  NMR (400 MHz,  $CDCl_3$ )  $\delta$ : 7.99-7.91 (m, 2H), 7.49-7.18 (m, 5H), 7.07-6.94 (m, 2H), 4.63-4.43 (m, 1H), 3.58-3.23 (m, 2H), 2.90 (d,  $J$  = 4.8 Hz, 3H), 2.55-2.45 (m, 1H), 2.07-1.90 (m, 4H);  $^{13}C$  NMR (100 MHz,  $CDCl_3$ )  $\delta$ : 197.6, 197.0, 170.7, 170.5,

166.9, 166.8, 164.3, 139.2, 138.5, 133.4, 133.0, 132.8, 132.5, 131.4, 131.3, 129.7, 129.6, 129.5, 129.4, 129.0, 128.7, 128.6, 128.0, 127.9, 127.6, 127.2, 115.9, 115.7, 115.5, 51.3, 50.8, 50.2, 48.8, 45.9, 45.8, 35.8, 33.1, 32.4, 32.3, 31.5, 21.6, 21.0;  $^{19}\text{F}$  NMR (376 MHz,  $\text{CDCl}_3$ )  $\delta$ : -104.5 (m, 1F), -105.4 (m, 1F), -114.5 (m, 1F), -115.4 (m, 1F); IR (KBr,  $\text{cm}^{-1}$ ): 1681, 1640, 1597, 1451; LRMS (EI, 70 eV)  $m/z$  (%): 313 ( $\text{M}^+$ , 3), 274 (5), 240 (18), 214 (33), 174 (11), 123 (100); HRMS  $m/z$  (ESI) calcd for  $\text{C}_{19}\text{H}_{21}\text{FNO}_2$  ( $[\text{M}+\text{H}]^+$ ) 314.1551, found 314.1546.

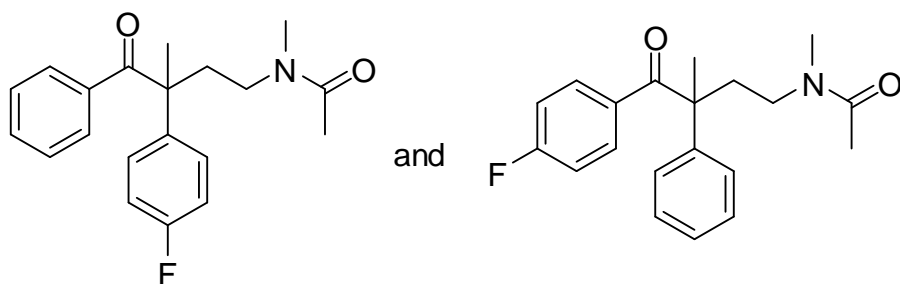

***N*-(3-(4-Fluorophenyl)-3-methyl-4-oxo-4-phenylbutyl)-*N*-methylacetamide (3sa) and *N*-(4-(4-Fluorophenyl)-3-methyl-4-oxo-3-phenylbutyl)-*N*-methylacetamide (3sa'):**

**3sa:3sa'** = 1.9:1; Colorless liquid;  $^1\text{H}$  NMR (400 MHz,  $\text{CDCl}_3$ )  $\delta$ : 7.55-7.40 (m, 4H), 7.38-7.22 (m, 3H), 7.12-7.04 (0.7H), 6.94-6.87 (m, 1.3H), 3.37-3.10 (m, 2H), 2.81 (d,  $J = 5.6$  Hz, 3H), 2.23-2.18 (m, 2H), 1.97 (s, 1.5H), 1.86 (s, 1.5H), 1.68 (s, 3H);  $^{13}\text{C}$  NMR (100 MHz,  $\text{CDCl}_3$ )  $\delta$ : 202.2, 201.5, 200.8, 170.2, 163.5, 143.2, 142.7, 136.3, 135.8, 132.5, 132.4, 132.3 (2C), 132.2, 132.1, 131.9, 131.8, 129.5, 129.4, 129.3, 129.1, 128.2, 128.0, 127.8, 127.7, 127.6, 127.2, 126.0 (2C), 116.3, 116.1, 116.0, 115.8, 115.3, 115.2, 115.1, 114.9, 53.4, 53.2, 52.9, 52.7, 46.9, 43.8, 39.2, 39.1, 37.1, 35.9, 33.2, 23.9, 23.6, 23.3, 23.1, 21.8, 20.7;  $^{19}\text{F}$  NMR (376 MHz,  $\text{CDCl}_3$ )  $\delta$ : -105.9 (m, 1F), -106.7 (m, 1F), -114.6 (m, 1F), -115.4 (m, 1F); IR (KBr,  $\text{cm}^{-1}$ ): 1674, 1642, 1598, 1506; LRMS (EI, 70 eV)  $m/z$  (%): 327 ( $\text{M}^+$ , 1), 228 (21), 204 (27), 123 (57), 86 (100); HRMS  $m/z$  (ESI) calcd for  $\text{C}_{20}\text{H}_{23}\text{FNO}_2$  ( $[\text{M}+\text{H}]^+$ ) 328.1707, found 328.1699.

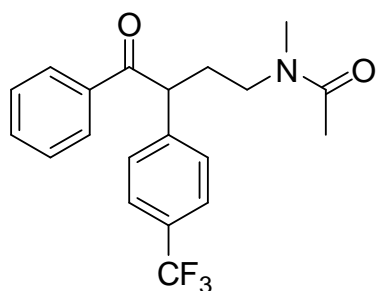

***N*-Methyl-*N*-(4-oxo-4-phenyl-3-(4-(trifluoromethyl)phenyl)butyl)acetamide (3ta):**

Colorless liquid;  $^1\text{H}$  NMR (400 MHz,  $\text{CDCl}_3$ )  $\delta$ : 7.95-7.91 (m, 2H), 7.59-7.39 (m, 7H), 4.78-4.59 (m, 1H), 3.62-3.22 (m, 2H), 2.91 (d,  $J = 6.4$  Hz, 3H), 2.61-2.49 (m, 1H), 2.08-1.88 (m, 4H);  $^{13}\text{C}$  NMR (100 MHz,  $\text{CDCl}_3$ )  $\delta$ : 198.6, 197.9, 170.8, 170.5, 143.3, 142.7, 136.0, 135.8, 133.6, 133.3, 128.8, 128.7 (2C), 128.5, 128.3, 126.3, 126.2, 125.9, 125.8 (2C), 50.8, 50.3, 48.8, 45.7, 35.9, 33.1, 32.4, 31.6, 21.6, 21.0;  $^{19}\text{F}$  NMR (376 MHz,  $\text{CDCl}_3$ )  $\delta$ : -62.6 (d,  $J = 29.0$  Hz, 3F); IR (KBr,  $\text{cm}^{-1}$ ): 1681, 1641, 1410, 1326; LRMS (EI, 70 eV)  $m/z$  (%): 363 ( $\text{M}^+$ , 2), 290 (5), 264 (11), 241 (8), 105 (100); HRMS  $m/z$  (ESI) calcd for  $\text{C}_{20}\text{H}_{21}\text{F}_3\text{NO}_2$  ( $[\text{M}+\text{H}]^+$ ) 364.1519, found 364.1512.

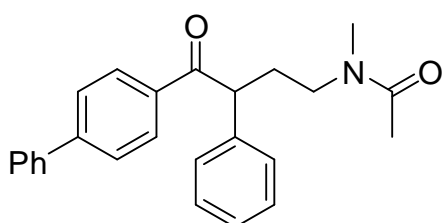

***N*-(4-(Biphenyl-4-yl)-4-oxo-3-phenylbutyl)-*N*-methylacetamide (3ua):**

White solid, mp 142.9-144.3  $^\circ\text{C}$  (uncorrected);  $^1\text{H}$  NMR (400 MHz,  $\text{CDCl}_3$ )  $\delta$ : 7.98-7.96 (m, 2H), 7.55-7.47 (m, 5H), 7.43-7.30 (m, 7H), 4.73-4.55 (m, 1H), 3.62-3.26 (m, 2H), 2.92 (d,  $J = 7.6$  Hz, 3H), 2.60-2.48 (m, 1H), 2.13-1.97 (m, 1H), 1.91 (s, 1.2H), 1.90 (s, 1.8H);  $^{13}\text{C}$  NMR (100 MHz,  $\text{CDCl}_3$ )  $\delta$ : 199.1, 198.5, 170.7, 170.5, 140.5, 140.4, 140.2, 139.9, 138.2, 137.6, 136.4, 136.2, 133.3, 133.0, 128.8, 128.7 (4C), 128.5 (2C), 128.4, 127.9, 127.6, 127.4, 127.3, 126.9; IR (KBr,  $\text{cm}^{-1}$ ): 1678, 1640, 1597, 1487; LRMS (EI, 70 eV)  $m/z$  (%): 371 ( $\text{M}^+$ , 19), 298 (88), 272 (17), 250 (21), 193 (48), 178 (27), 105 (100). HRMS  $m/z$  (ESI) calcd for  $\text{C}_{25}\text{H}_{26}\text{NO}_2$  ( $[\text{M}+\text{H}]^+$ ) 372.1958, found 372.1960.

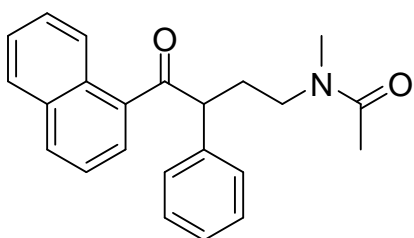

***N*-Methyl-*N*-(4-(naphthalen-1-yl)-4-oxo-3-phenylbutyl)acetamide (3va):**

Colorless liquid;  $^1\text{H}$  NMR (400 MHz,  $\text{CDCl}_3$ )  $\delta$ : 7.99-7.96 (m, 2H), 7.82-7.72 (m, 4H), 7.48-7.40 (m, 4H), 7.38-7.33 (m, 2H), 4.85-4.66 (m, 1H), 3.64-3.25 (m, 2H), 2.92, 2.88 (s, 3H), 2.62-2.54 (m, 1H), 2.18-2.17 (m, 1H), 1.96, 1.89 (s, 3H);  $^{13}\text{C}$  NMR (100 MHz,  $\text{CDCl}_3$ )  $\delta$ : 199.1, 198.5, 170.7,

170.5, 136.7, 136.4, 136.2, 136.1, 133.6, 133.2, 132.9, 132.5, 132.4, 129.2, 128.8, 128.7, 128.6, 128.5, 127.7 (2C), 127.6, 127.5, 127.0, 126.5, 126.2, 126.0, 125.8, 125.6, 51.3, 50.8, 48.9, 45.9, 35.8, 33.1, 32.3, 31.5, 21.6, 21.0; IR (KBr,  $\text{cm}^{-1}$ ): 1678, 1637, 1597, 1406; LRMS (EI, 70 eV)  $m/z$  (%): 345 ( $\text{M}^+$ , 20), 272 (70), 224 (20), 105 (100); HRMS  $m/z$  (ESI) calcd for  $\text{C}_{23}\text{H}_{24}\text{NO}_2$  ( $[\text{M}+\text{H}]^+$ ) 346.1802, found 346.1797.

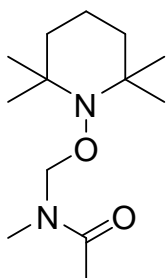

***N*-Methyl-*N*-((2,2,6,6-tetramethylpiperidin-1-yloxy)methyl)acetamide (4):**

Colorless liquid;  $^1\text{H}$  NMR (400 MHz,  $\text{CDCl}_3$ )  $\delta$ : 4.96 (s, 0.4H), 4.91 (s, 1.6H), 3.11 (s, 0.6H), 3.04 (s, 2.4H), 2.22 (s, 2.4H), 2.10 (s, 0.6H), 1.59-1.52 (m, 1H), 1.48-1.44 (m, 4H), 1.36-1.32 (m, 1H), 1.17, 1.11 (s, 12H);  $^{13}\text{C}$  NMR (100 MHz,  $\text{CDCl}_3$ )  $\delta$ : 171.6, 171.1, 85.4, 81.4, 77.3, 77.0, 76.7, 59.9, 59.7, 39.8, 39.7, 35.9, 34.0, 33.1, 32.9, 22.0, 21.5, 20.0, 17.0 (2C); IR (KBr,  $\text{cm}^{-1}$ ): 1651, 1466, 1441, 1374; LRMS (EI, 70 eV)  $m/z$  (%): 242 ( $\text{M}^+$ , 1), 184 (2), 157 (6), 142 (166), 86 (100); HRMS  $m/z$  (ESI) calcd for  $\text{C}_{13}\text{H}_{27}\text{N}_2\text{O}_2$  ( $[\text{M}+\text{H}]^+$ ) 243.2067, found 243.2066.

**(D) Reference**

[1] H. Li, F.-M. Zhang, Y.-Q. Tu, Q.-W. Zhang, Z.-M. Chen, Z.-H. Chen, J. Li, *Chem. Sci.*, **2011**, 2, 1839.

N-Methyl-N-(4-oxo-3,4-diphenylbutyl)acetamide (3aa)

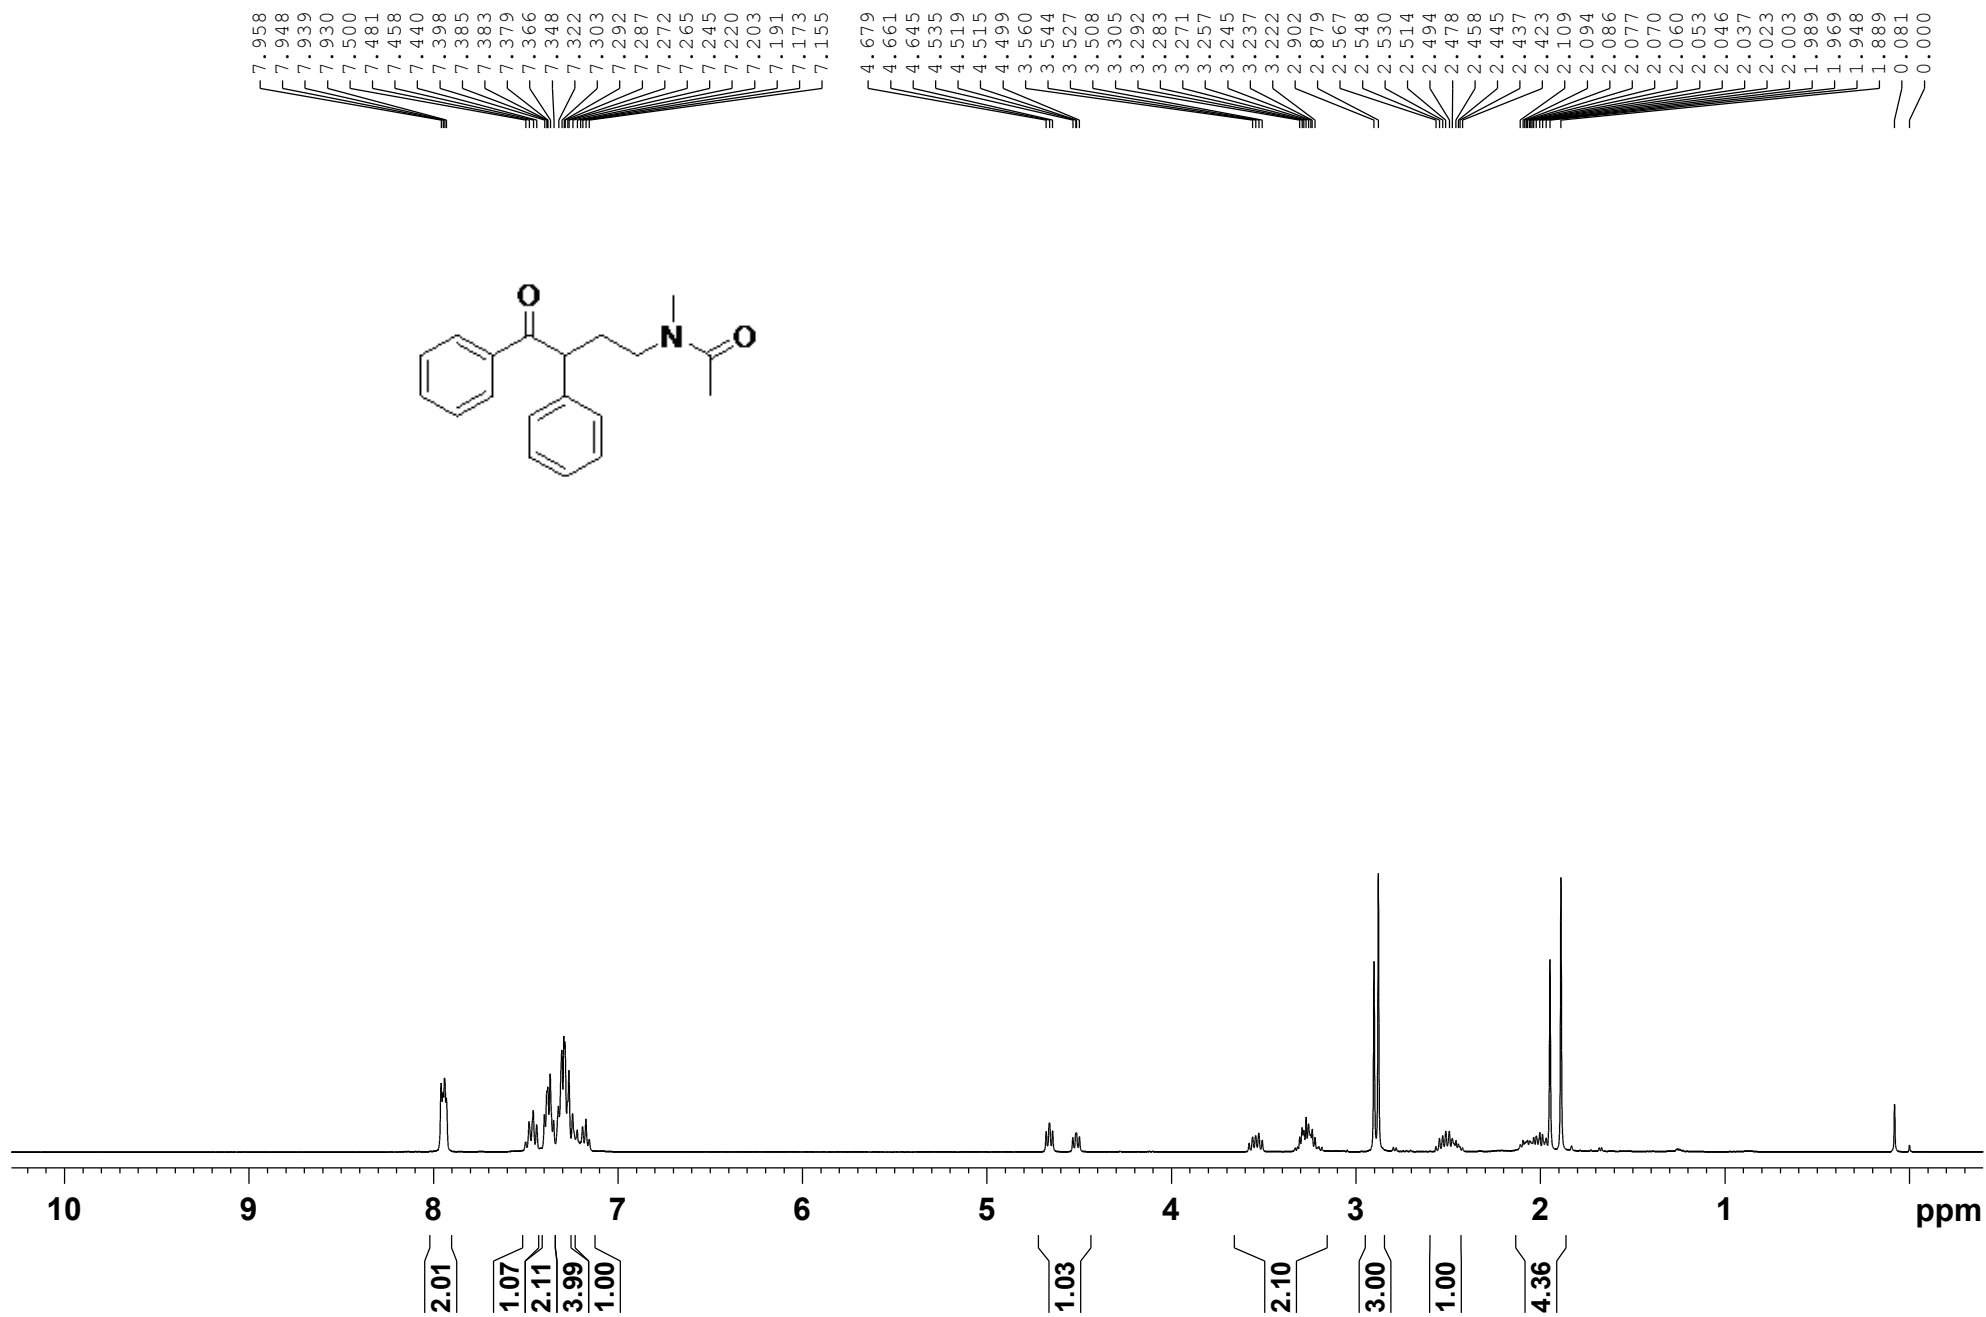

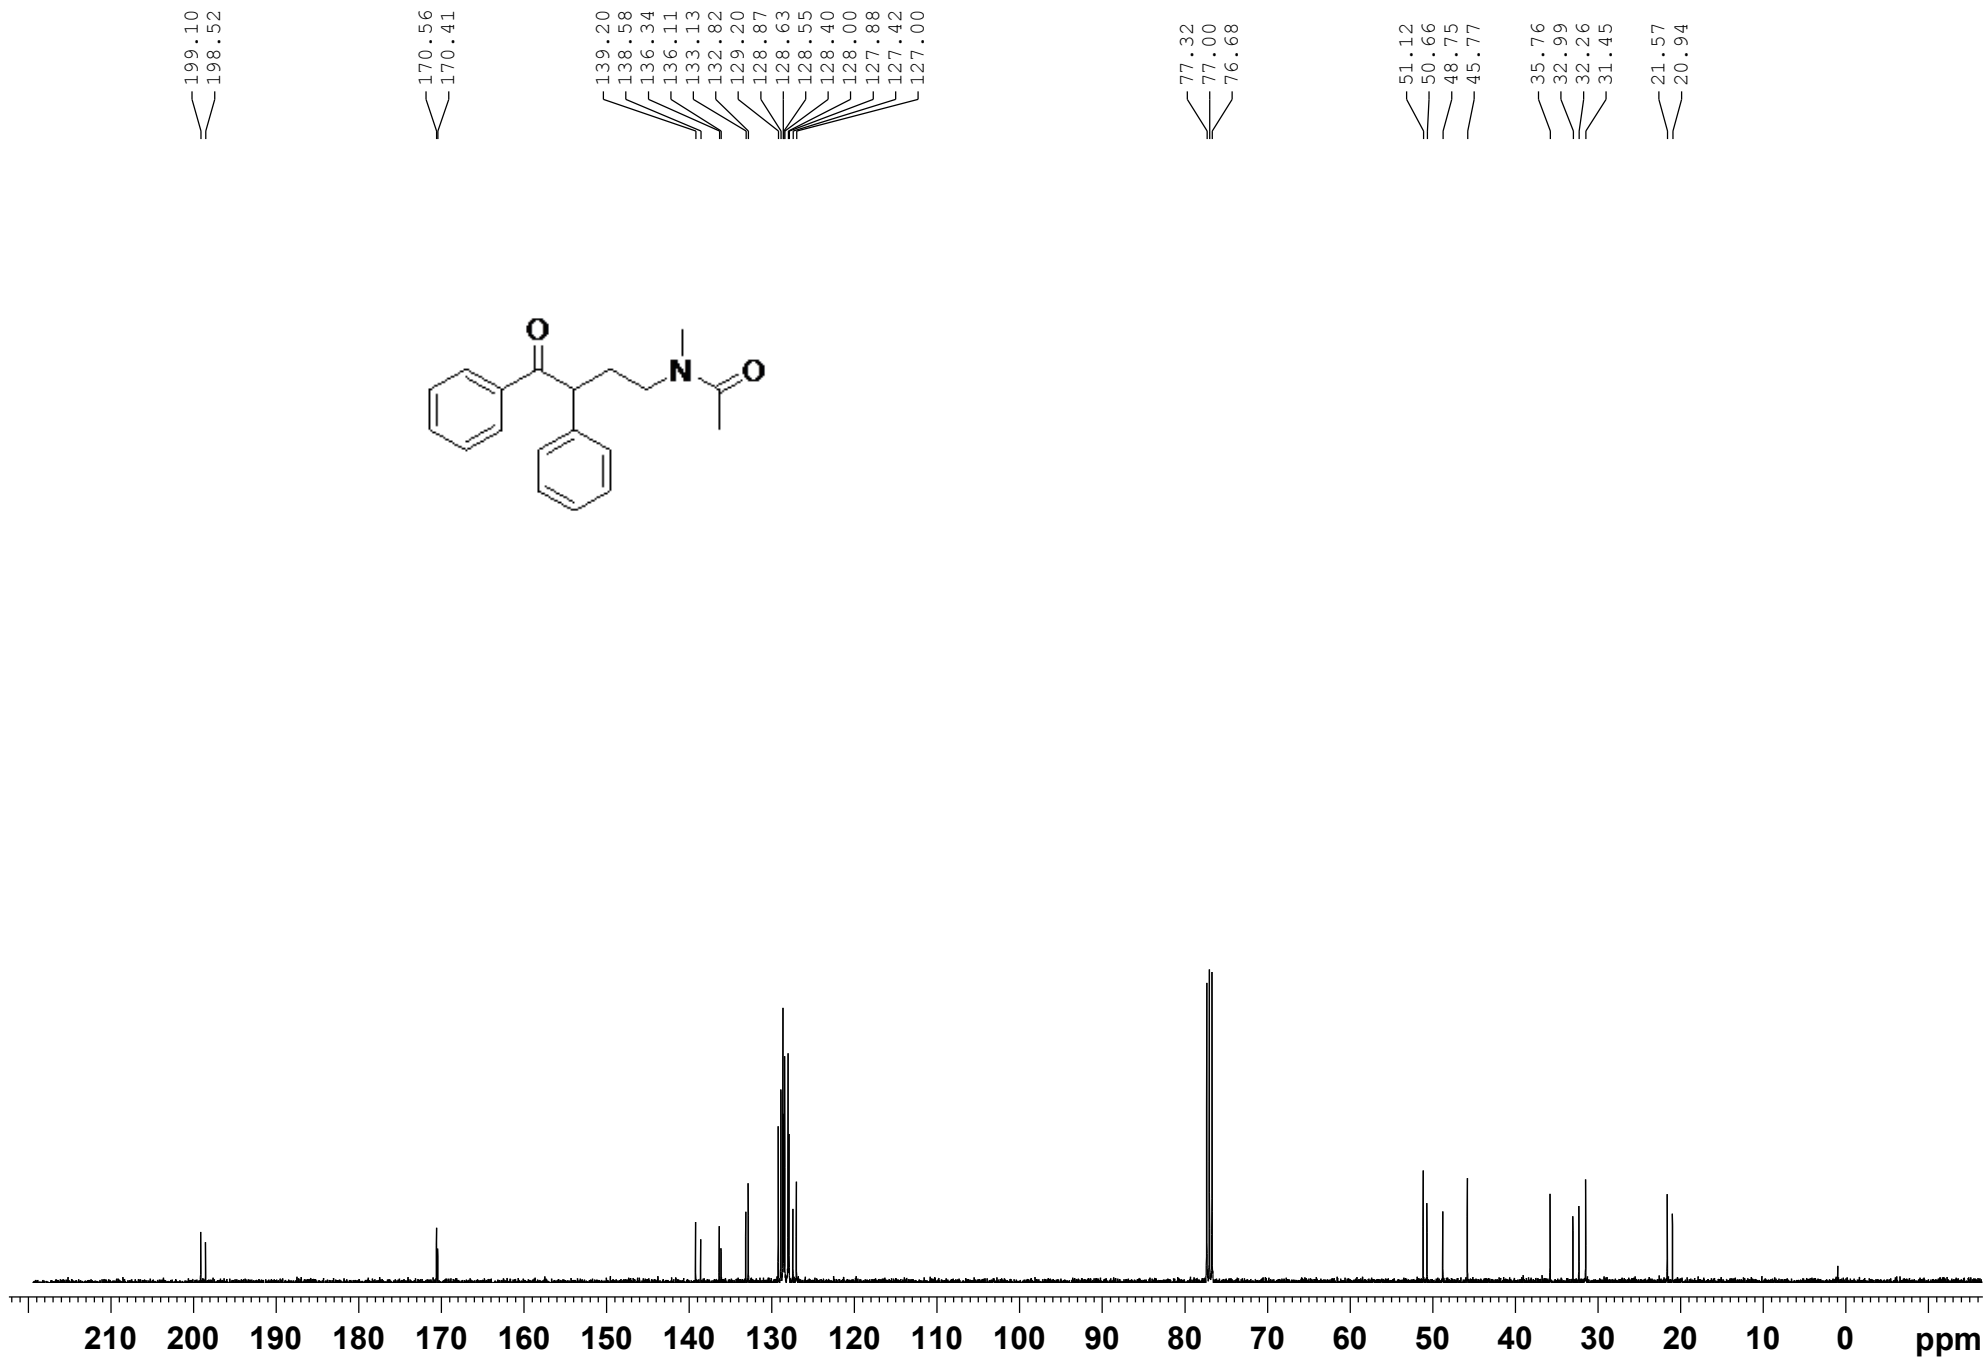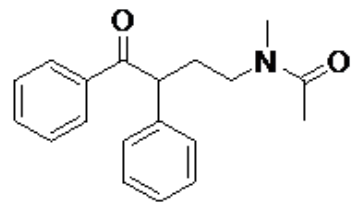

N-Methyl-N-(4-oxo-3,4-diphenylbutyl)formamide (3ab)

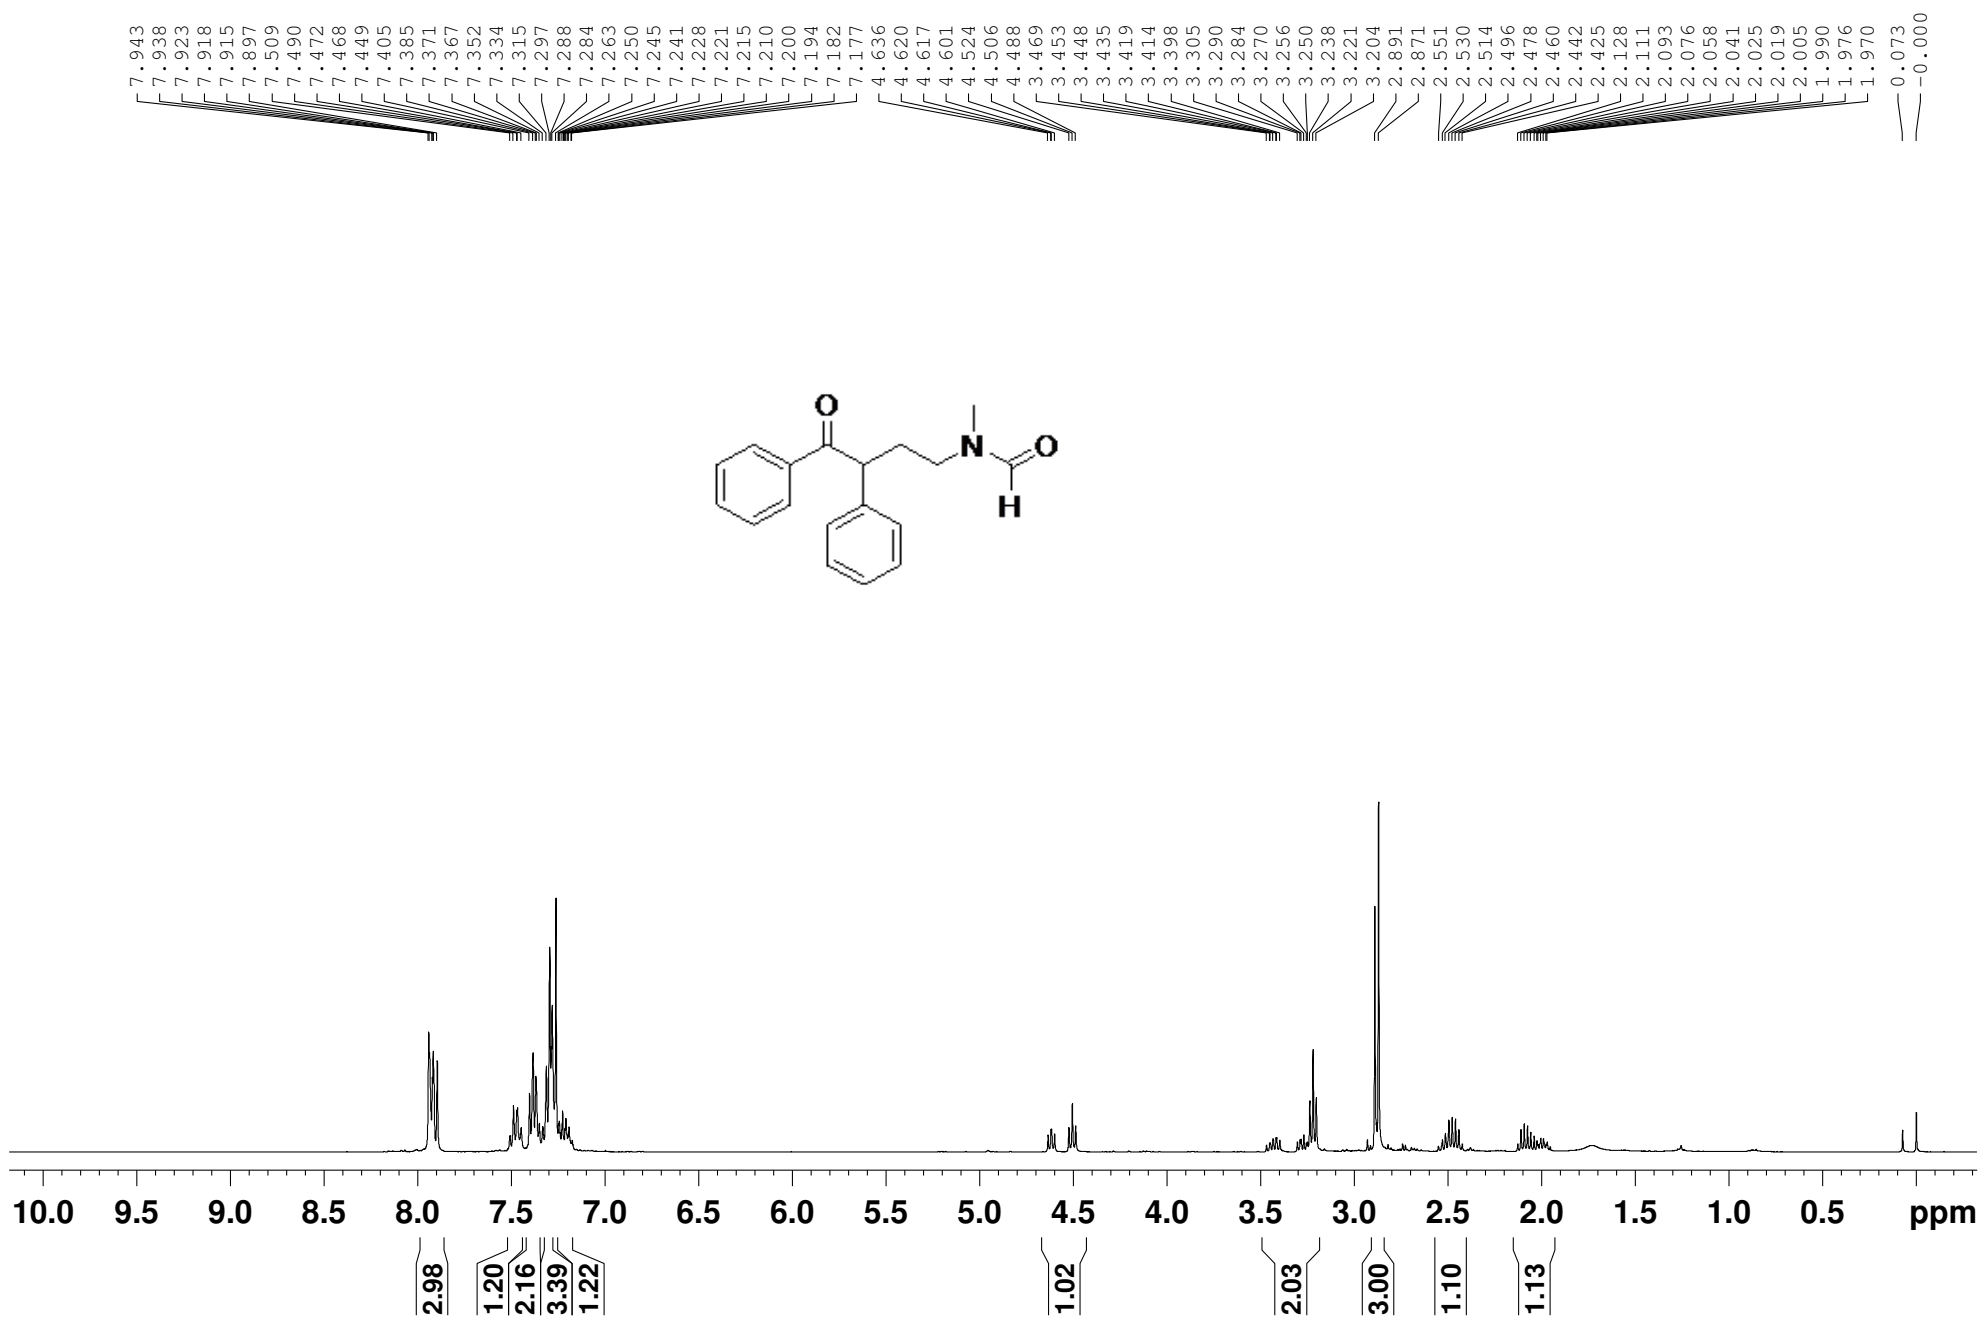

199.02  
198.56

162.71  
162.65  
139.01  
138.23  
136.38  
136.12  
133.24  
132.95  
129.29  
129.05  
128.72  
128.66  
128.64  
128.50  
128.10  
128.07  
127.56  
127.23

77.32  
77.00  
76.68

51.27  
50.21  
47.43  
42.70  
34.40  
31.75  
30.86  
29.36

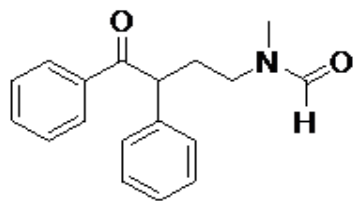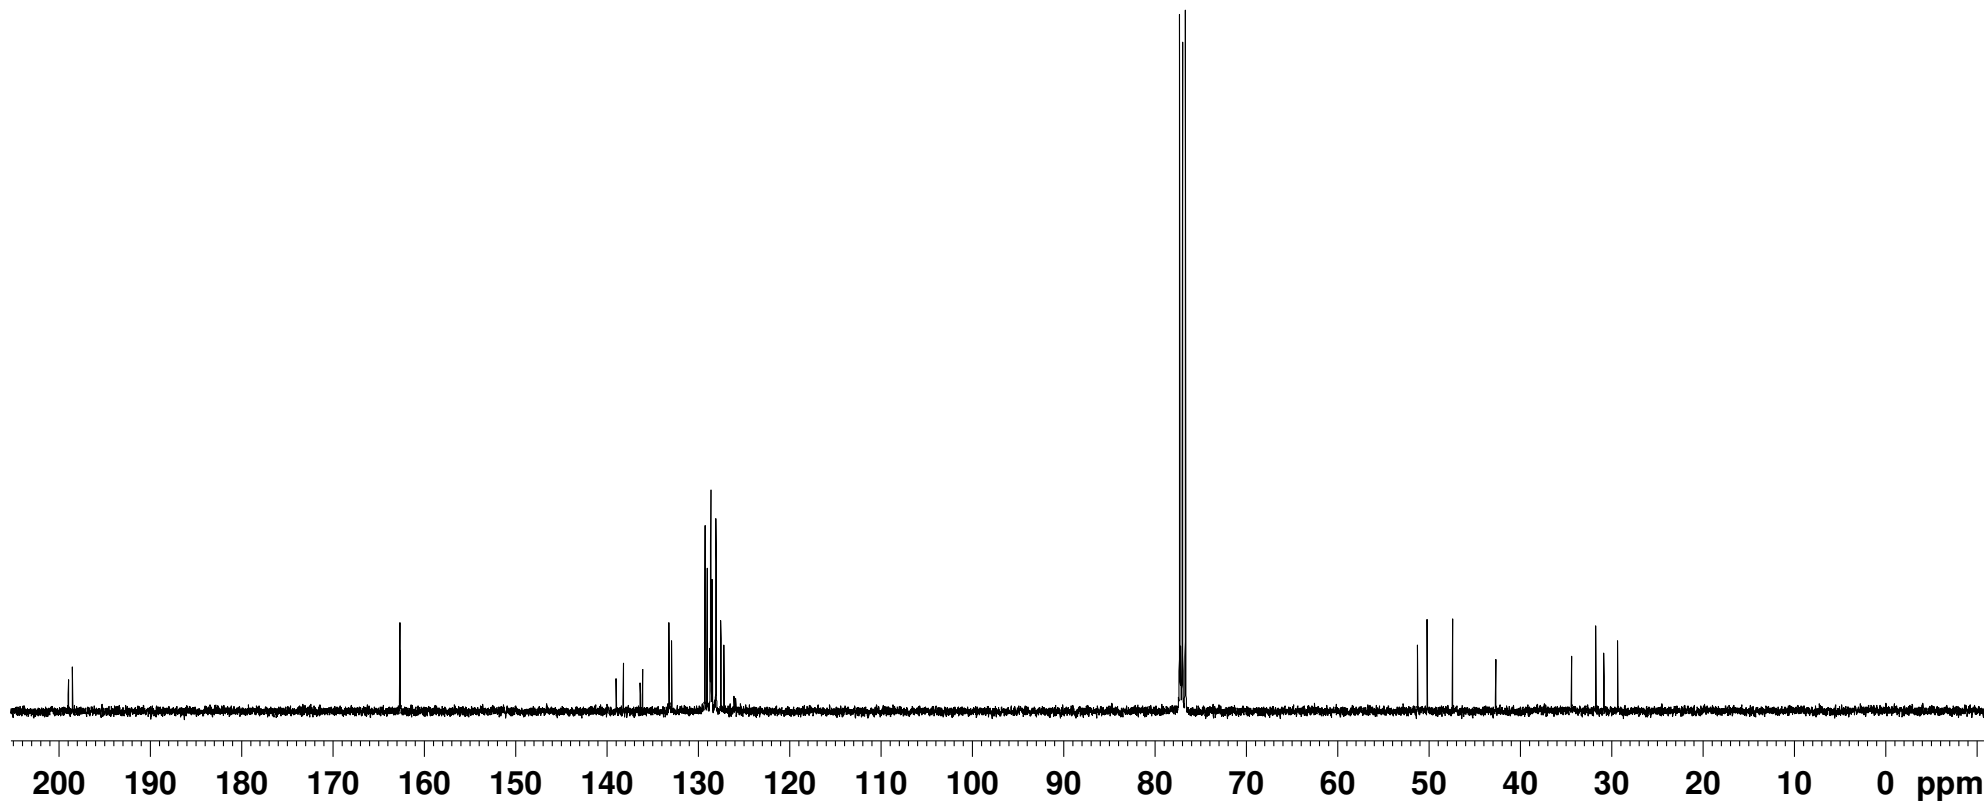



N,N-Dimethyl-4-oxo-3,4-diphenylbutanamide (3ab')

8.021  
8.003  
8.000  
7.468  
7.449  
7.431  
7.383  
7.363  
7.345  
7.338  
7.334  
7.316  
7.299  
7.281  
7.259  
7.220  
7.185

5.258  
5.249  
5.232  
5.223

3.537  
3.511  
3.497  
3.471  
3.008  
2.907  
2.653  
2.643  
2.612  
2.603

0.072  
-0.000

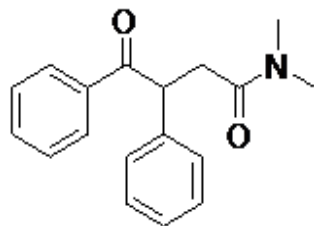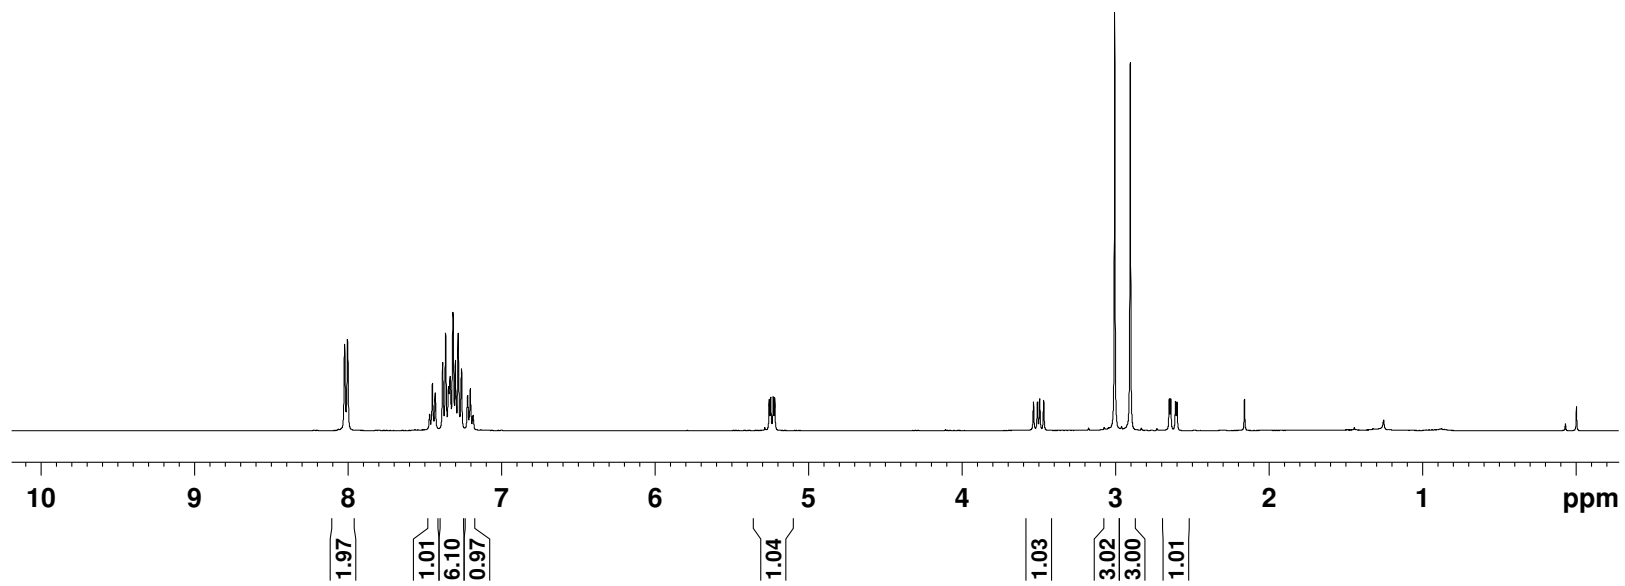

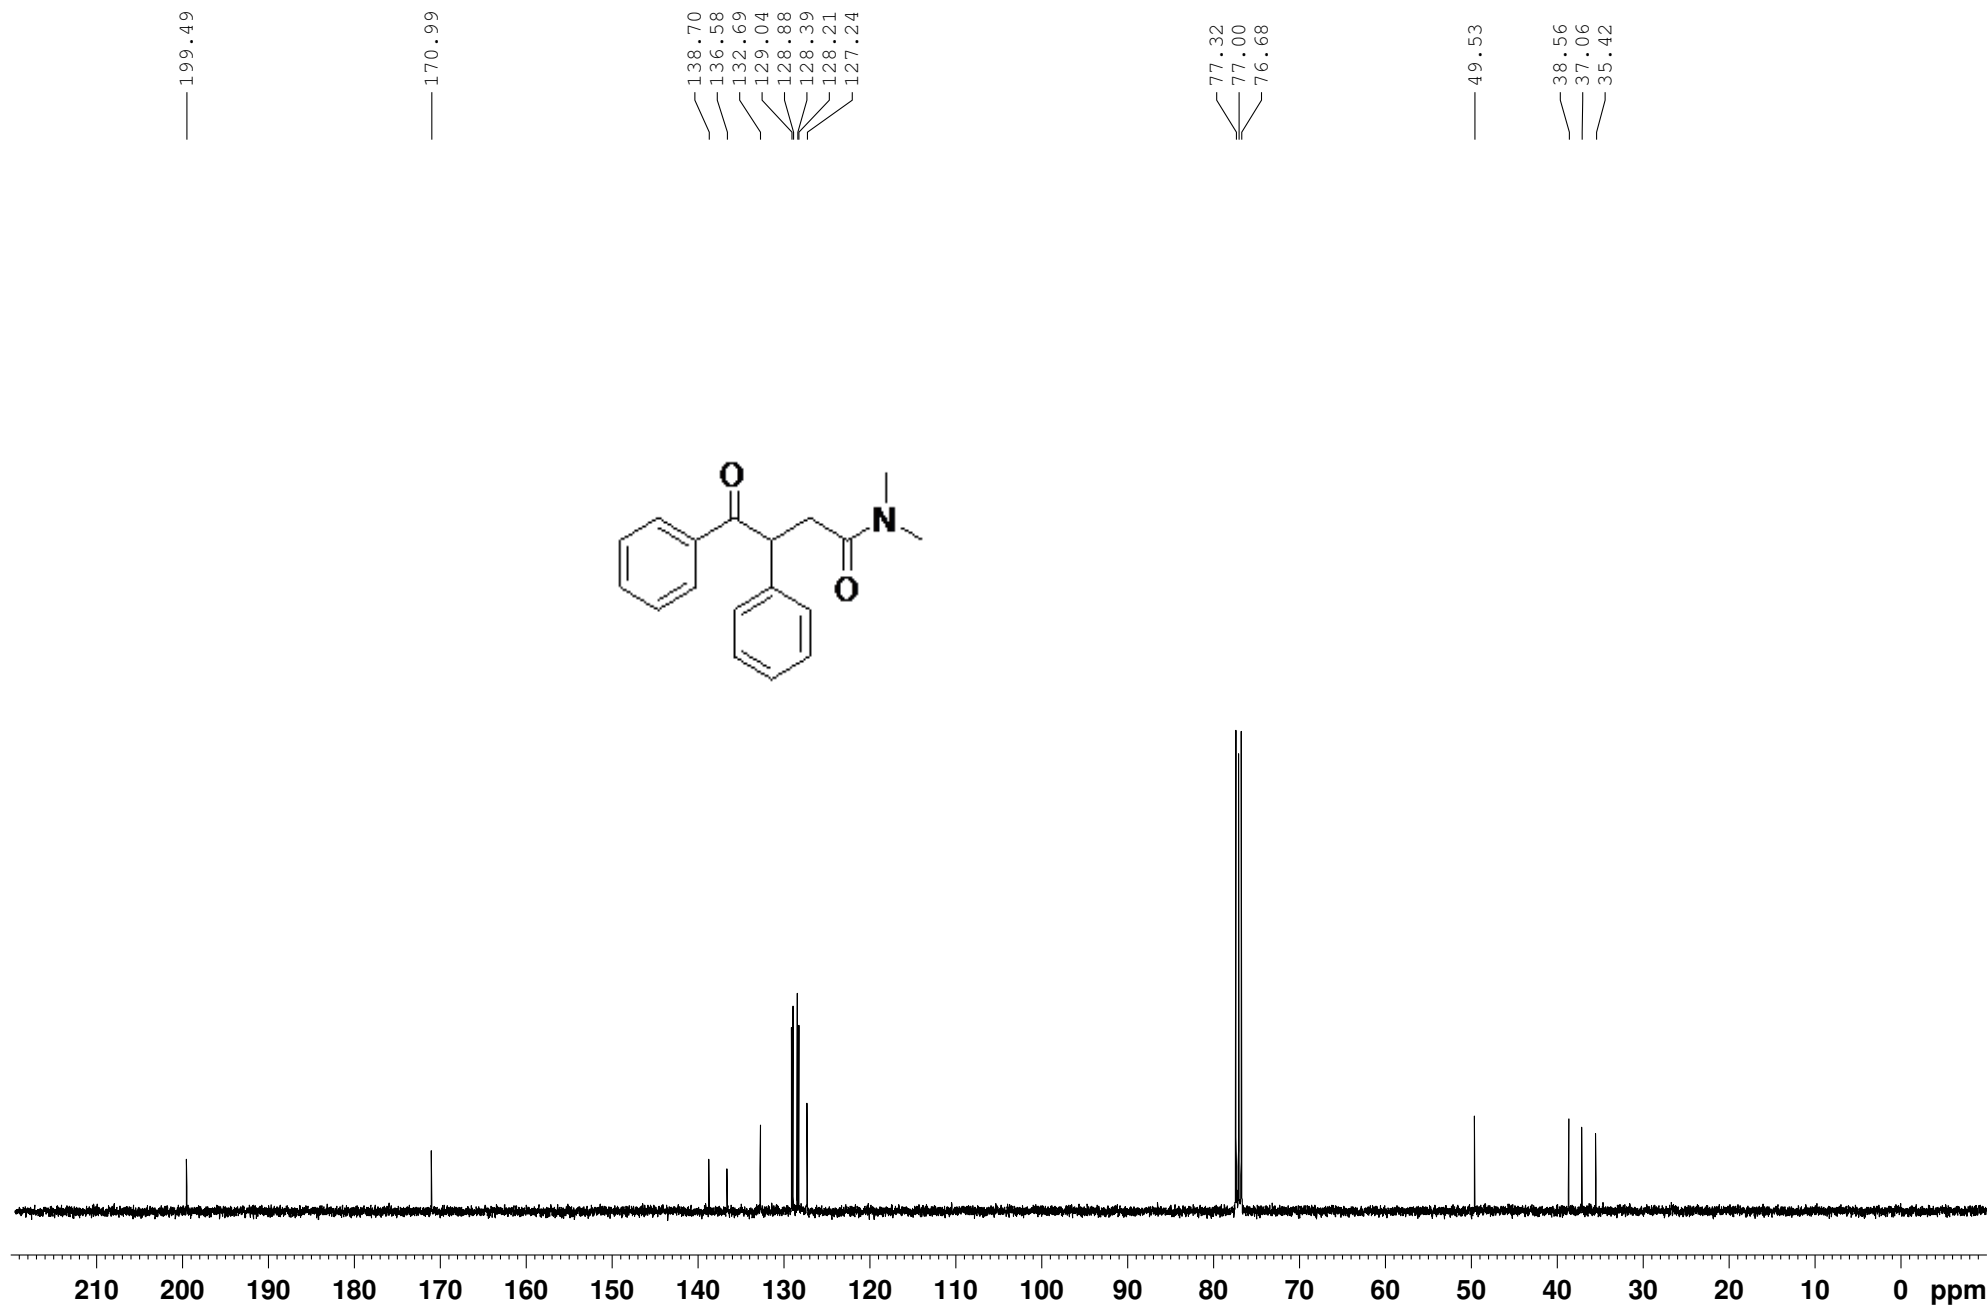

1,1,3-Trimethyl-3-(4-oxo-3,4-diphenylbutyl)urea (3ac)

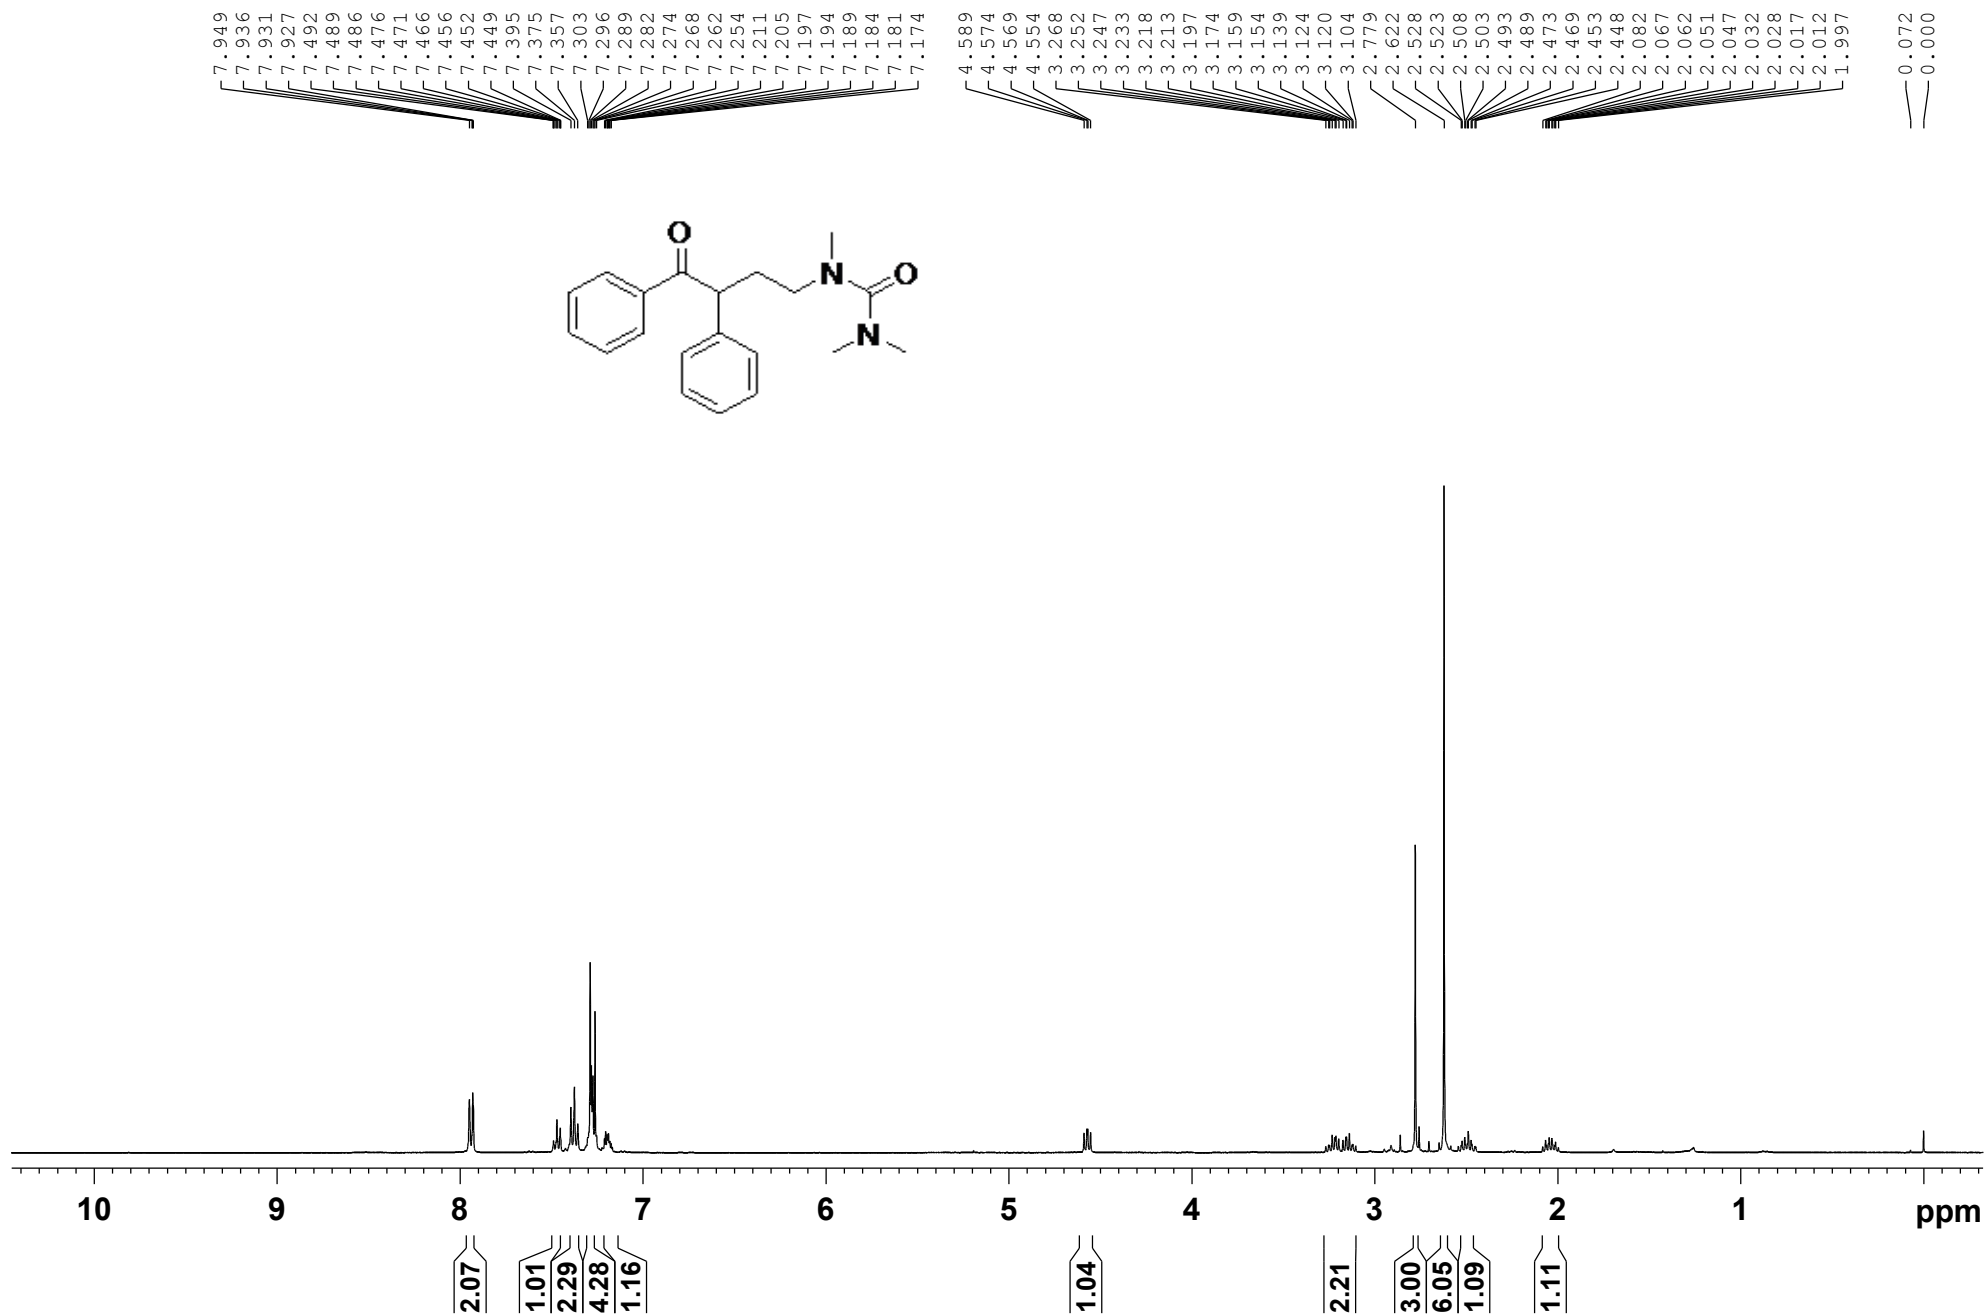

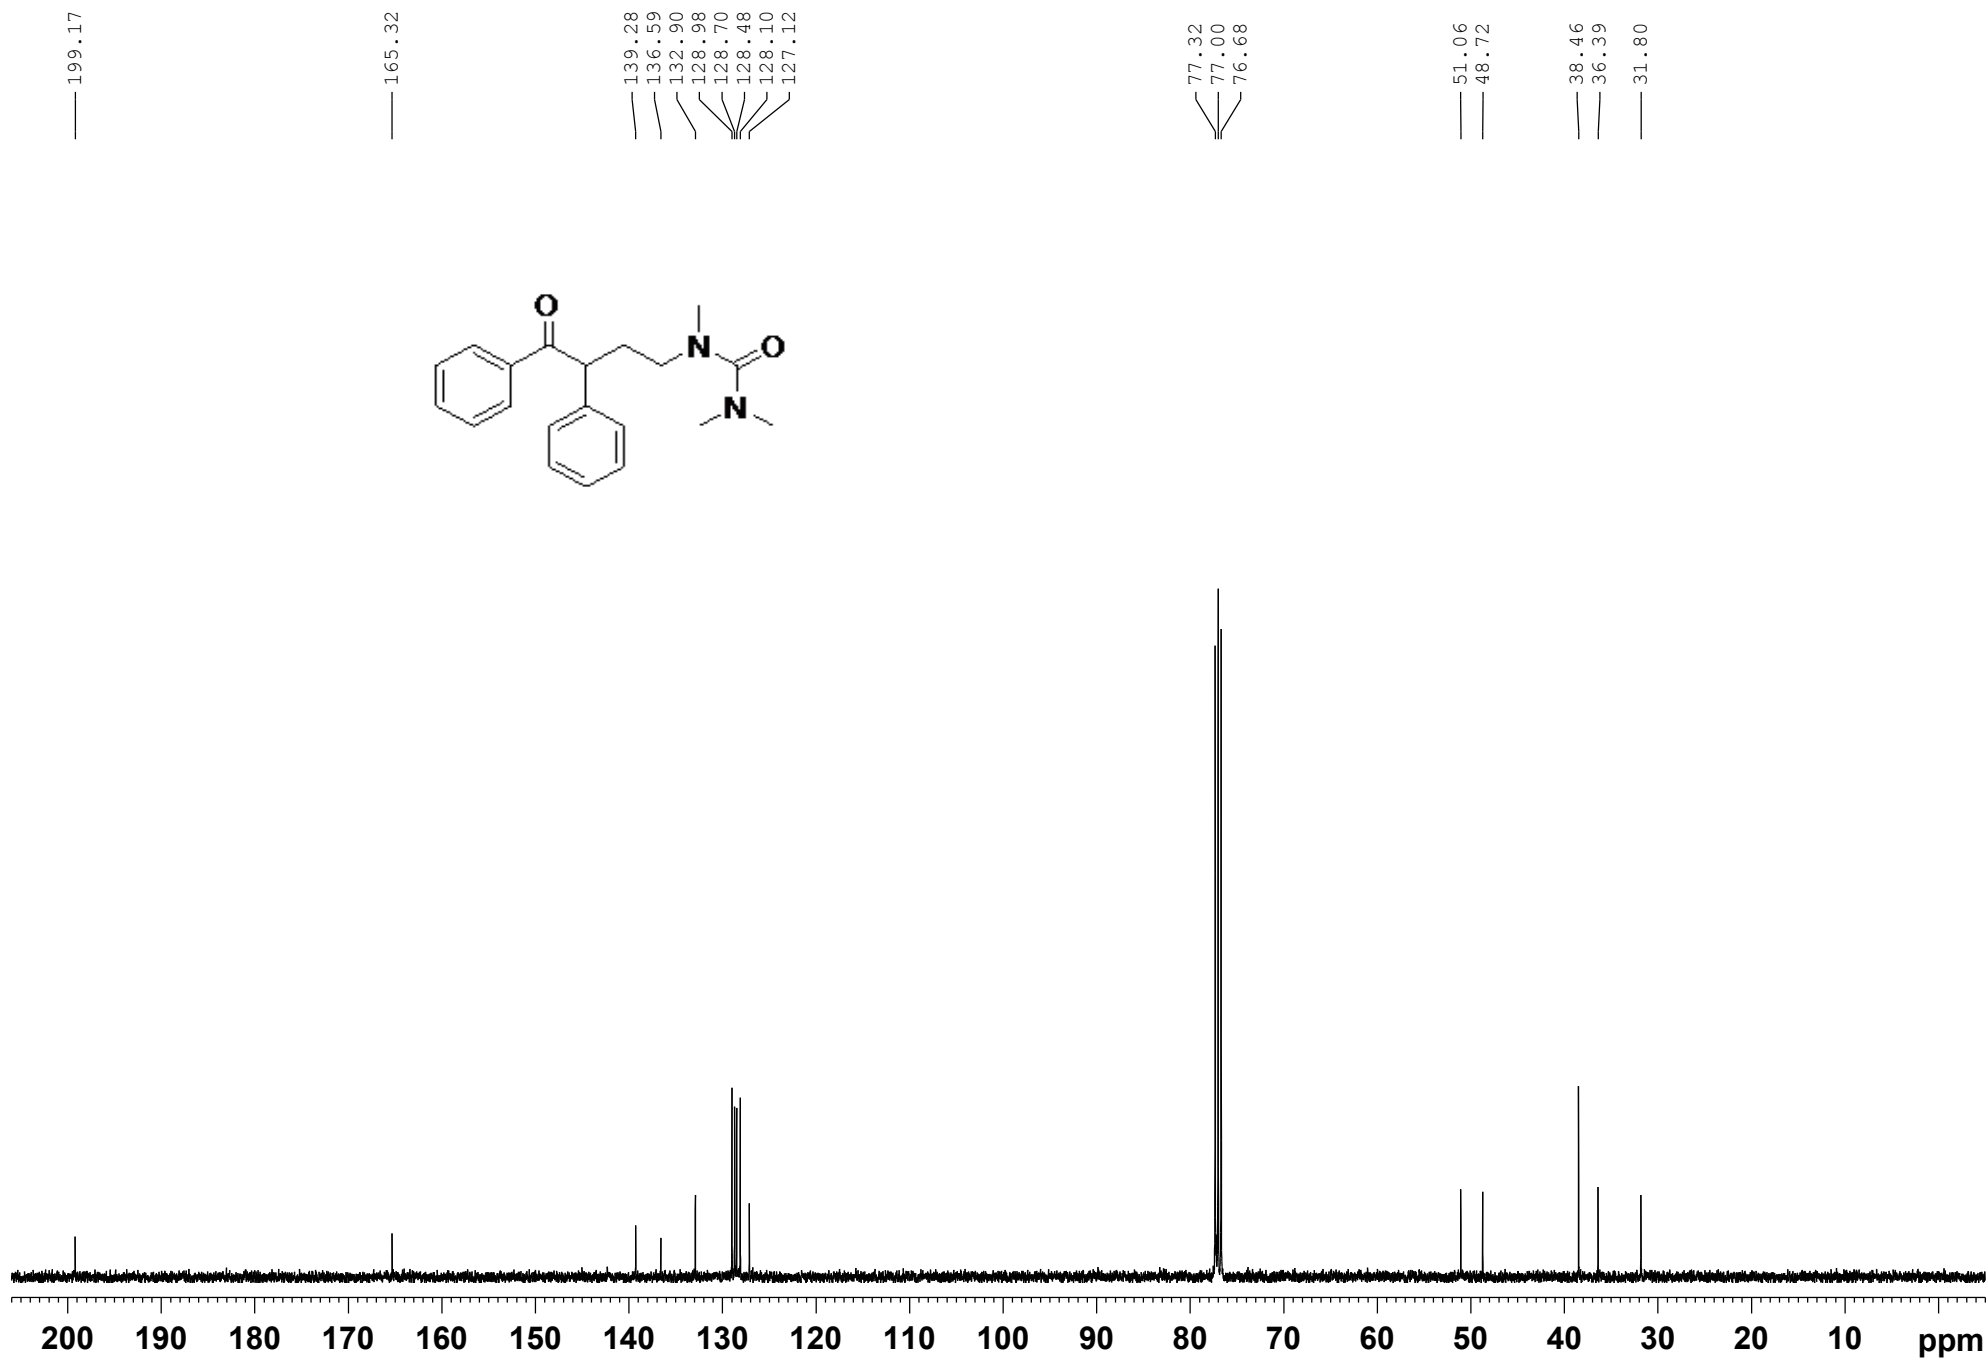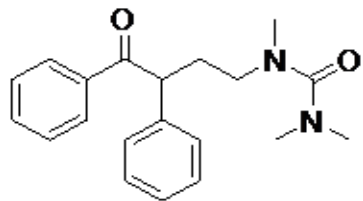

1,1,3-Trimethyl-3-(3-methyl-4-oxo-3,4-diphenylbutyl)urea (3gc)

7.505  
7.487  
7.484  
7.429  
7.427  
7.410  
7.408  
7.395  
7.390  
7.372  
7.368  
7.351  
7.347  
7.342  
7.329  
7.324  
7.320  
7.311  
7.307  
7.284  
7.264  
7.245

3.116  
3.102  
3.091  
3.083  
3.076  
3.066  
3.058  
3.042  
3.033  
3.017  
3.008  
2.999  
2.993  
2.985  
2.973  
2.959  
2.703  
2.699  
2.405  
2.391  
2.372  
2.359  
2.346  
2.344  
2.333  
2.319  
2.300  
2.285  
1.694

0.050  
0.000

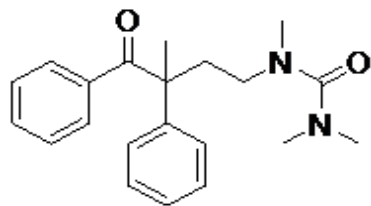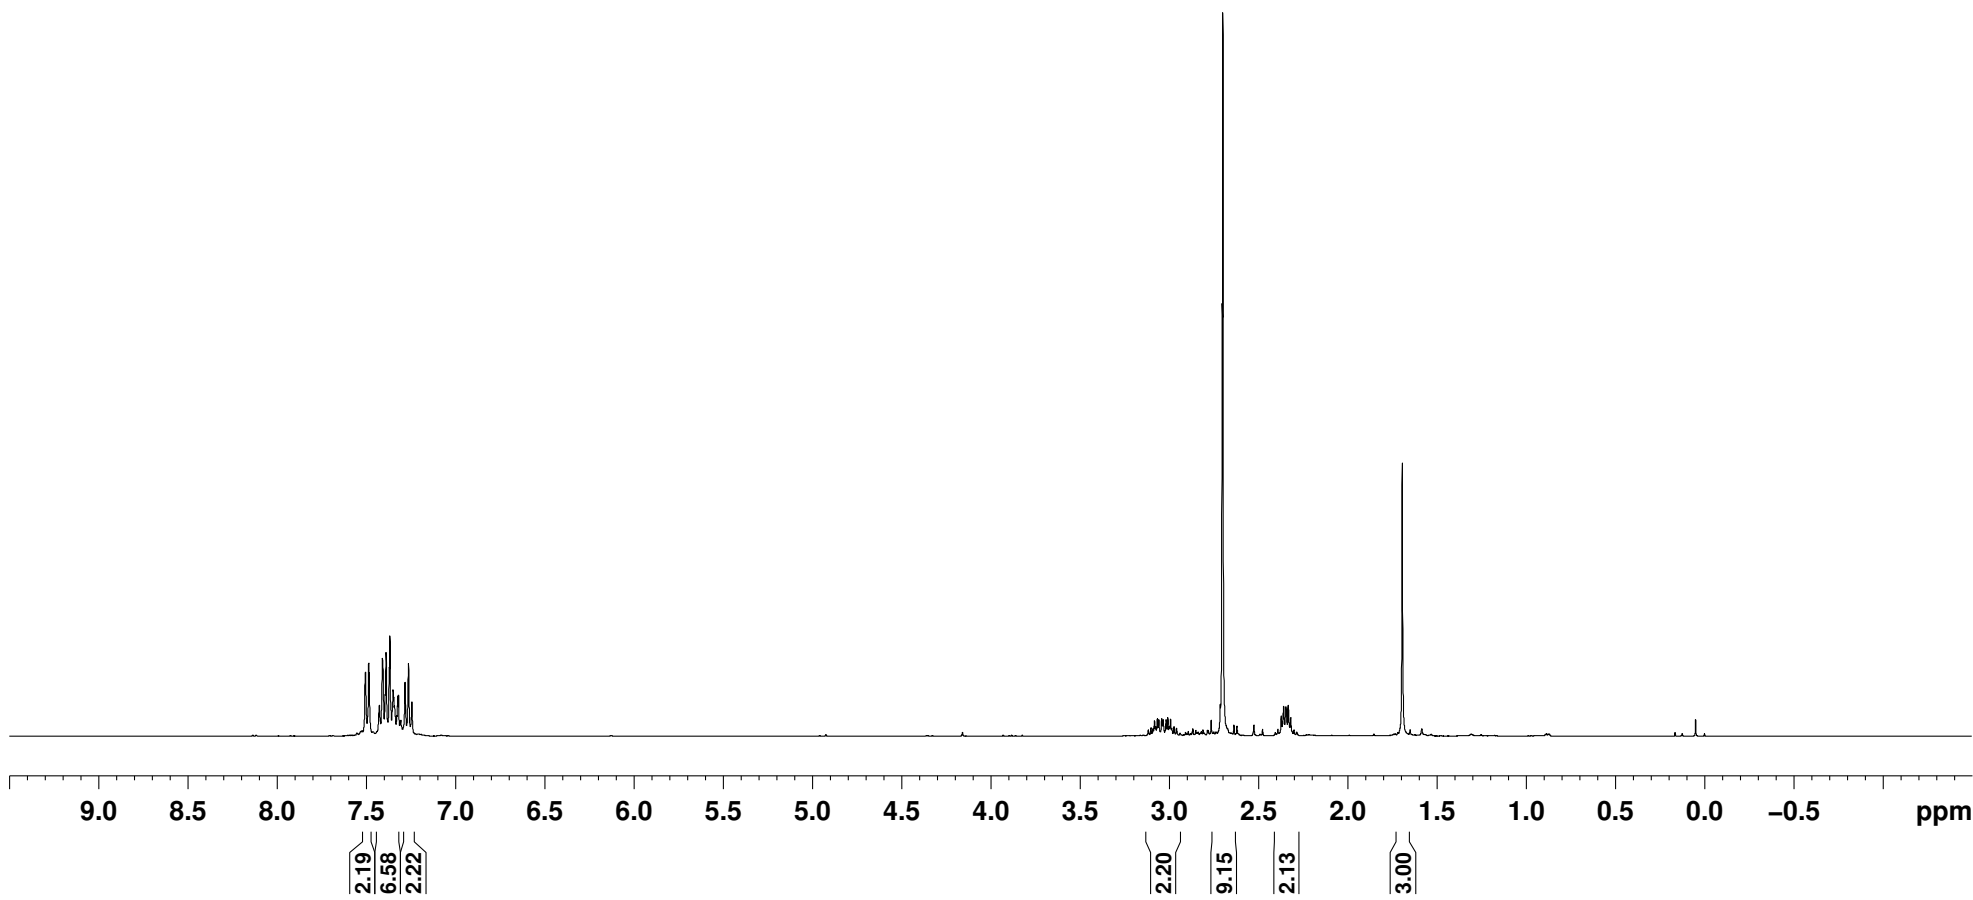

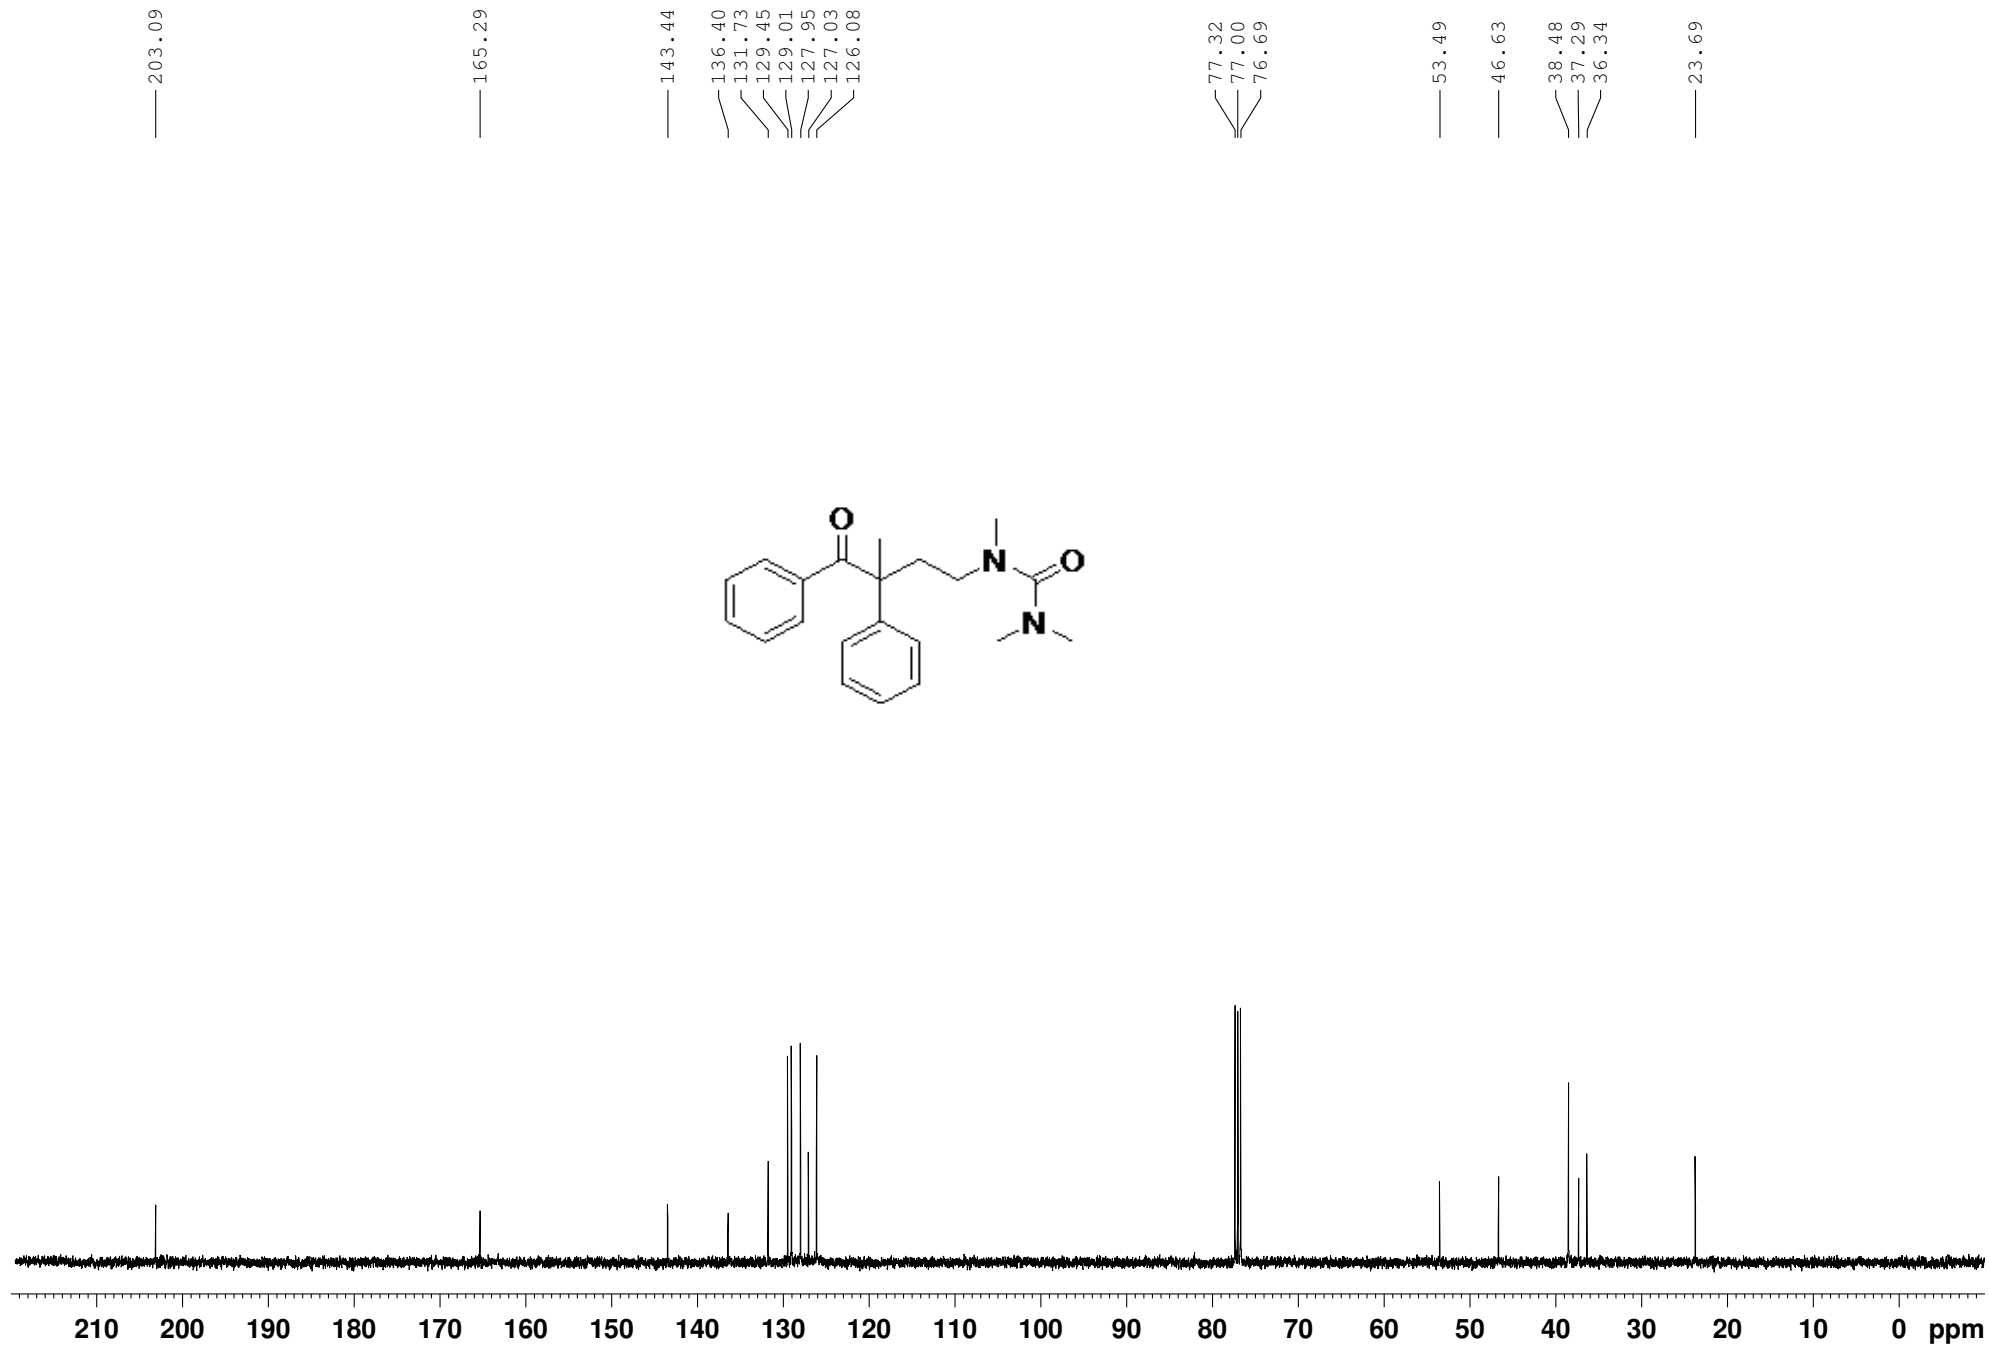

1-Methyl-5-(3-oxo-2,3-diphenylpropyl)pyrrolidin-2-one (3ad)

8.033  
8.015  
8.010  
8.007  
7.989  
7.985  
7.473  
7.468  
7.453  
7.450  
7.437  
7.434  
7.428  
7.425  
7.405  
7.400  
7.381  
7.362  
7.344  
7.334  
7.330  
7.326  
7.313  
7.310  
7.305  
7.301  
7.287  
7.283  
7.276  
7.261  
7.244  
7.216  
7.213  
7.210  
7.194  
7.190  
7.176  
7.174  
5.407  
5.396  
5.382  
5.370  
5.331  
5.318  
5.309  
5.295  
3.270  
3.261  
3.248  
3.241  
3.227  
3.223  
3.219  
3.198  
3.179  
3.174  
2.819  
2.398  
2.392  
2.382  
2.370  
2.360  
2.349  
2.336  
2.325  
2.271  
2.263  
2.255  
2.250  
2.242  
2.233  
2.133  
2.126  
2.114  
2.100  
2.092  
2.087  
2.081  
2.068  
1.710  
1.688  
1.679  
1.657  
1.634  
1.613  
1.602  
1.581  
0.000

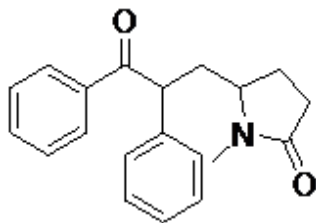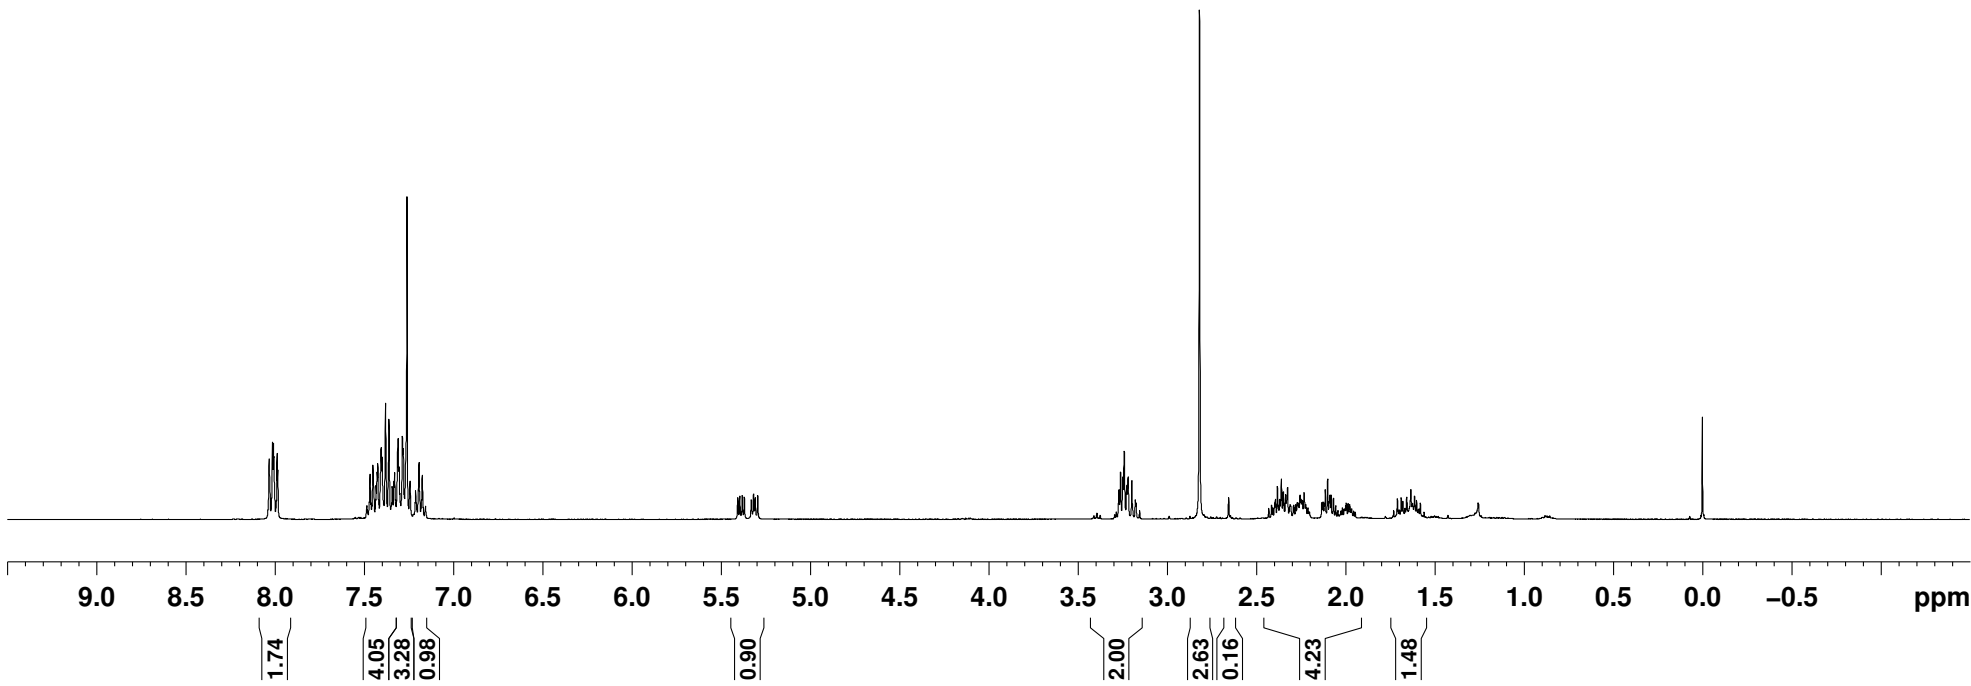

200.13  
200.11

176.66  
176.61

139.49  
139.09  
137.01  
136.54  
132.83  
132.74  
128.93  
128.88  
128.86  
128.83  
128.80  
128.49  
128.42  
128.29  
128.22  
127.04

77.32  
77.00  
76.68

50.69  
50.22  
47.48  
39.31  
37.96  
36.46  
35.95  
29.64  
29.60  
26.00  
25.91

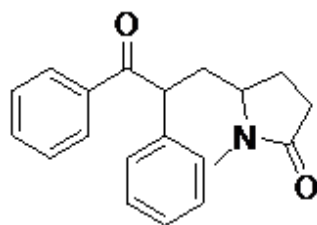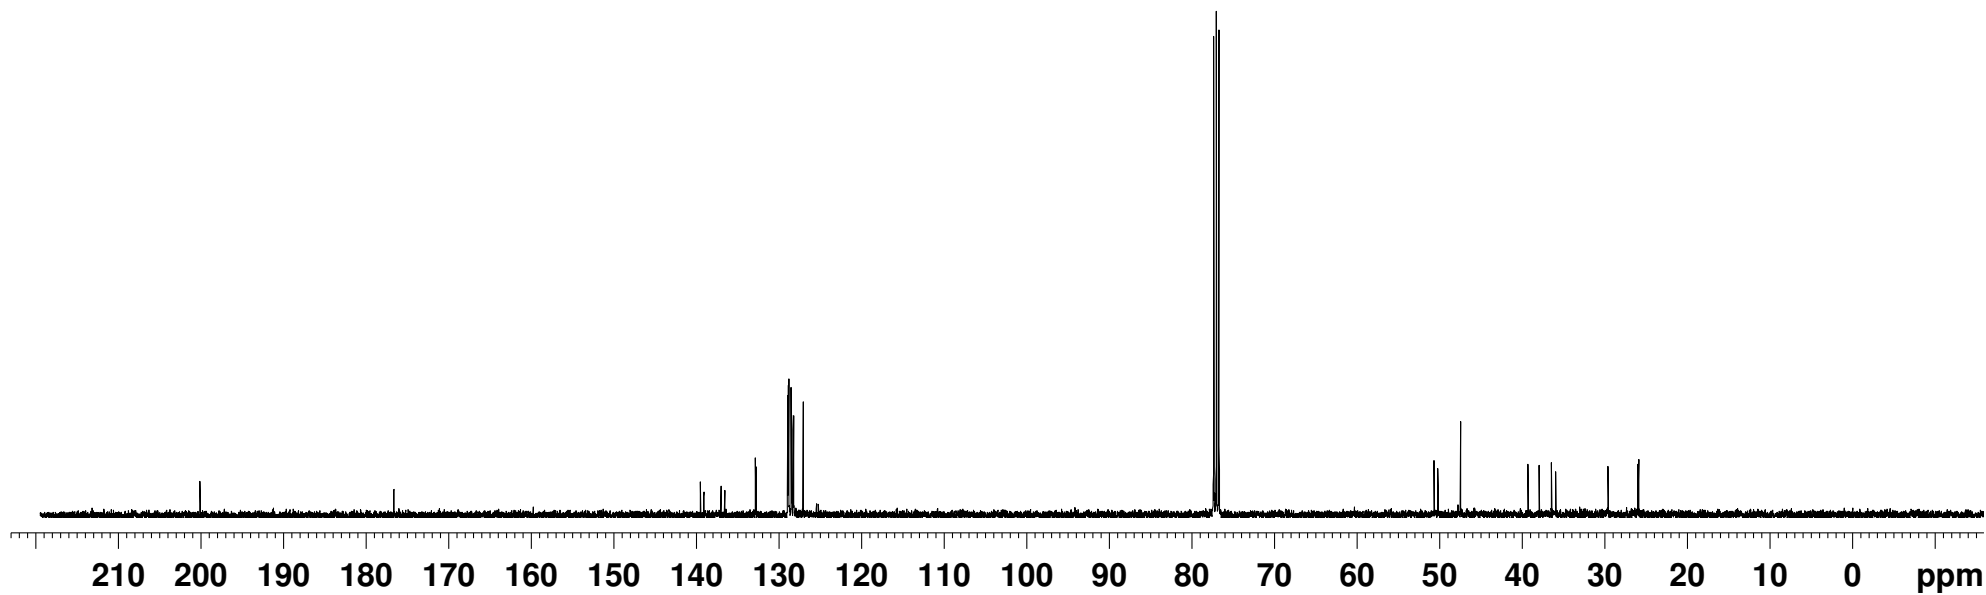



1,3-Dimethyl-4-(3-oxo-2,3-diphenylpropyl)imidazolidin-2-one (3ae)

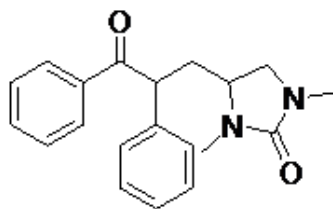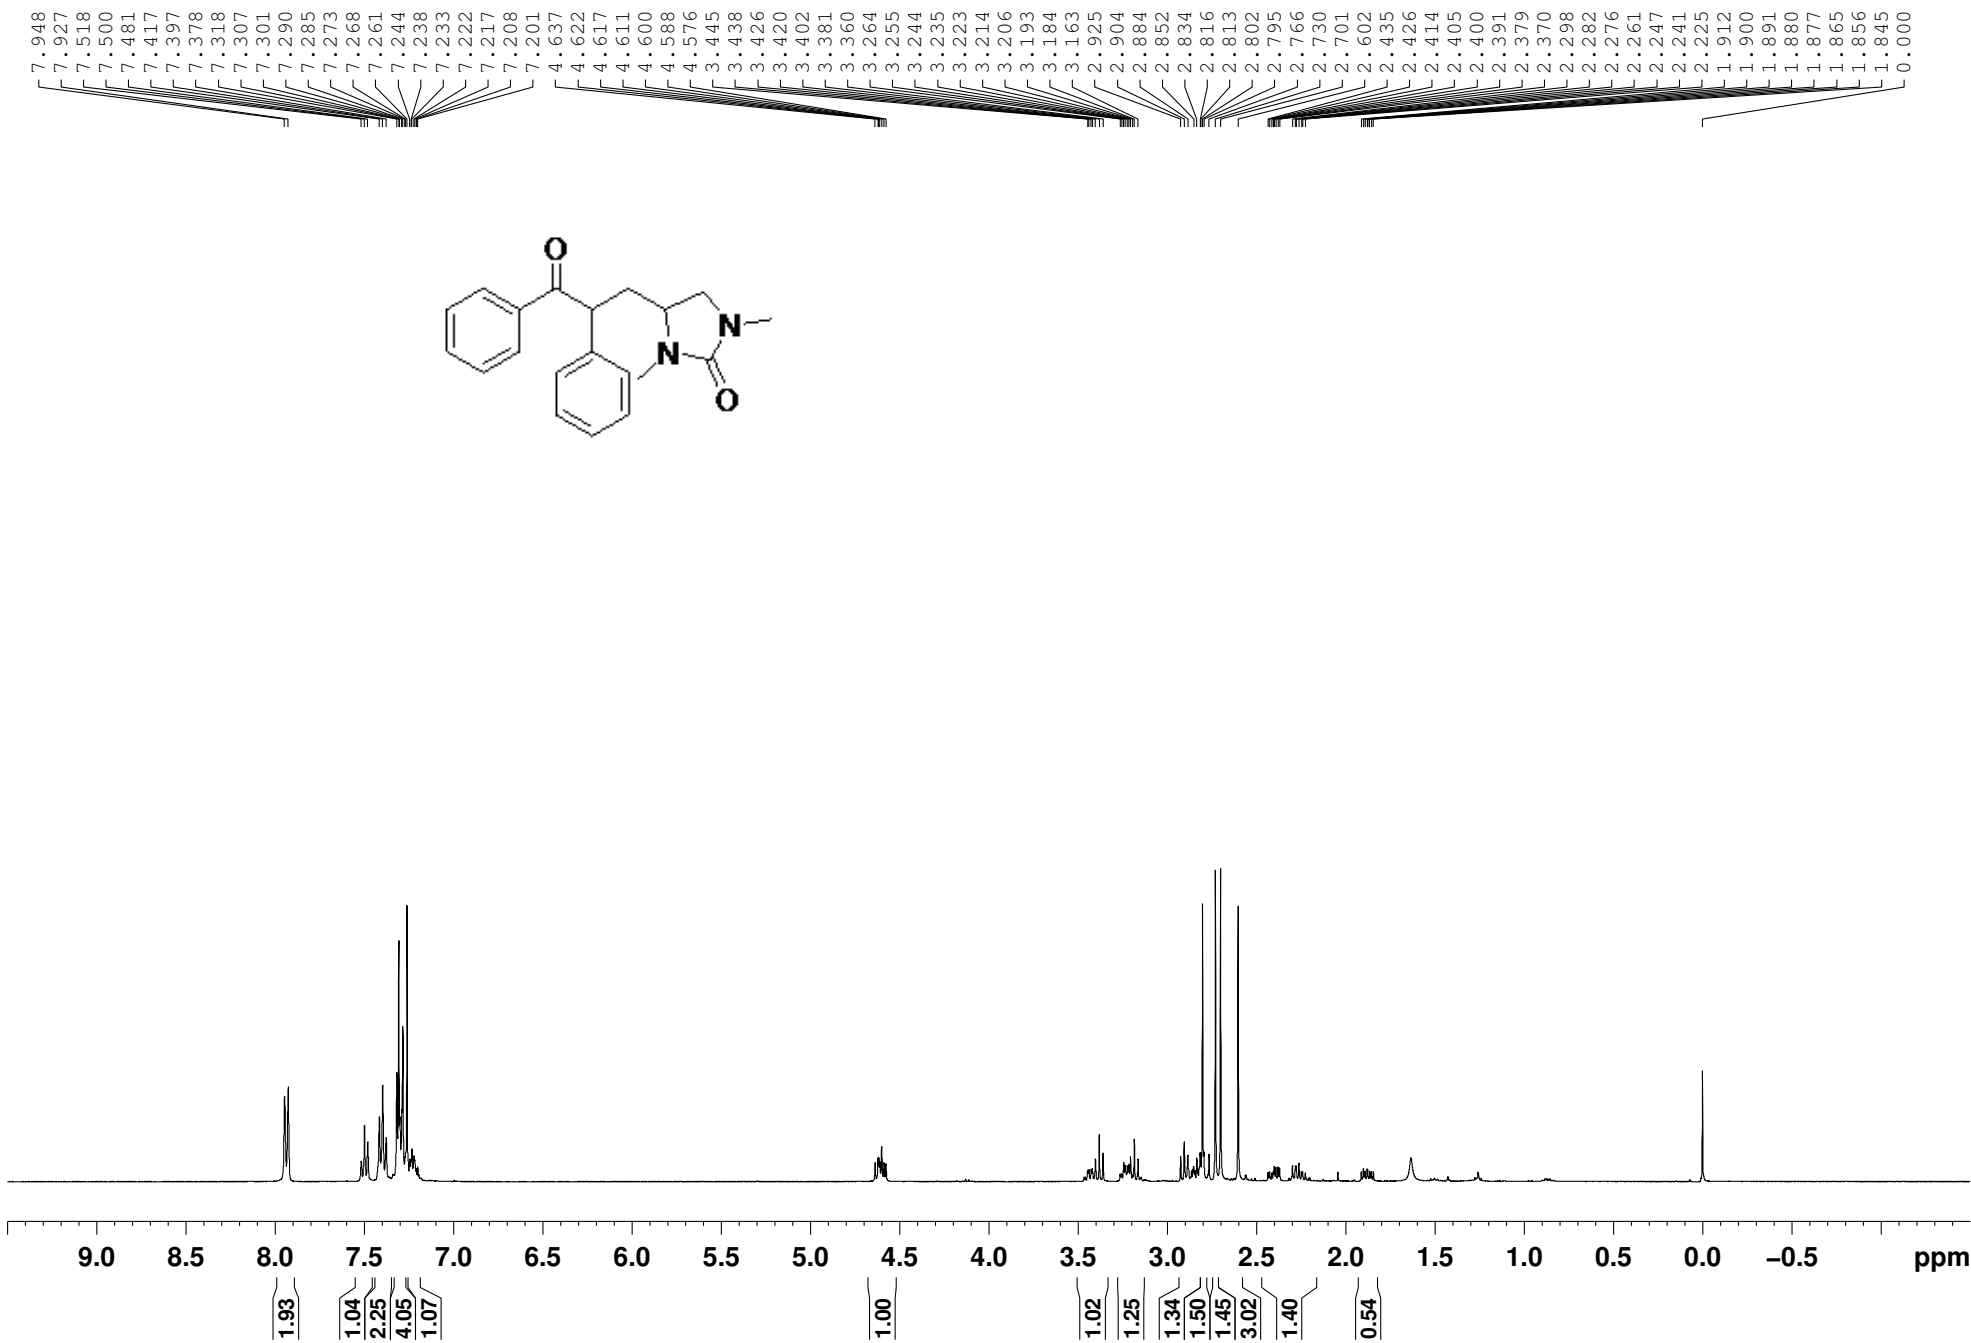

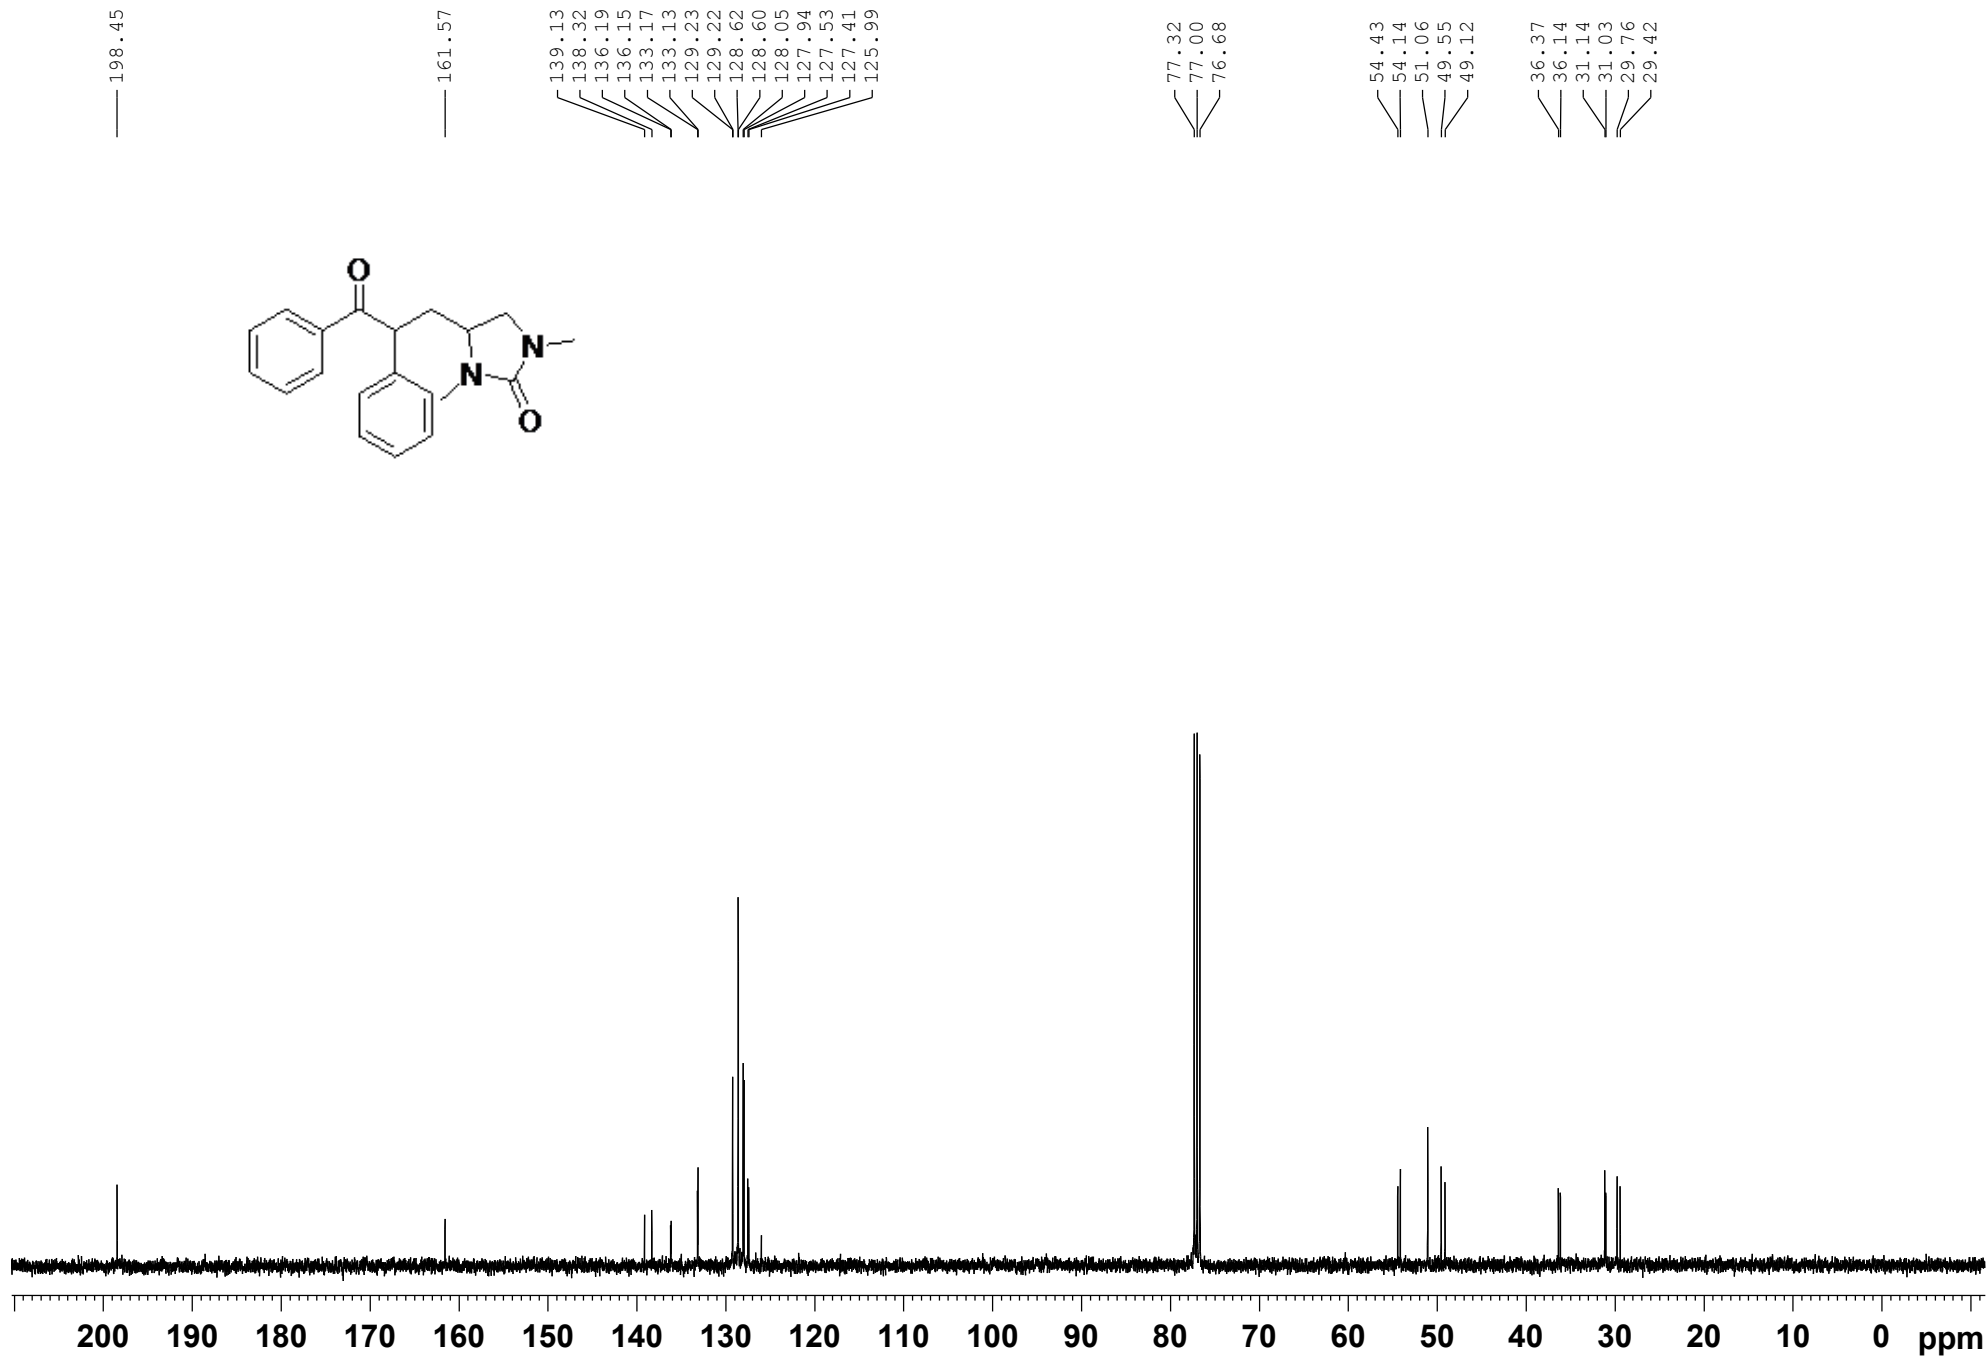

N-Methyl-N-(4-oxo-3,4-dip-tolylbutyl)acetamide (3ba)

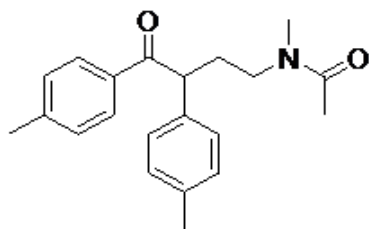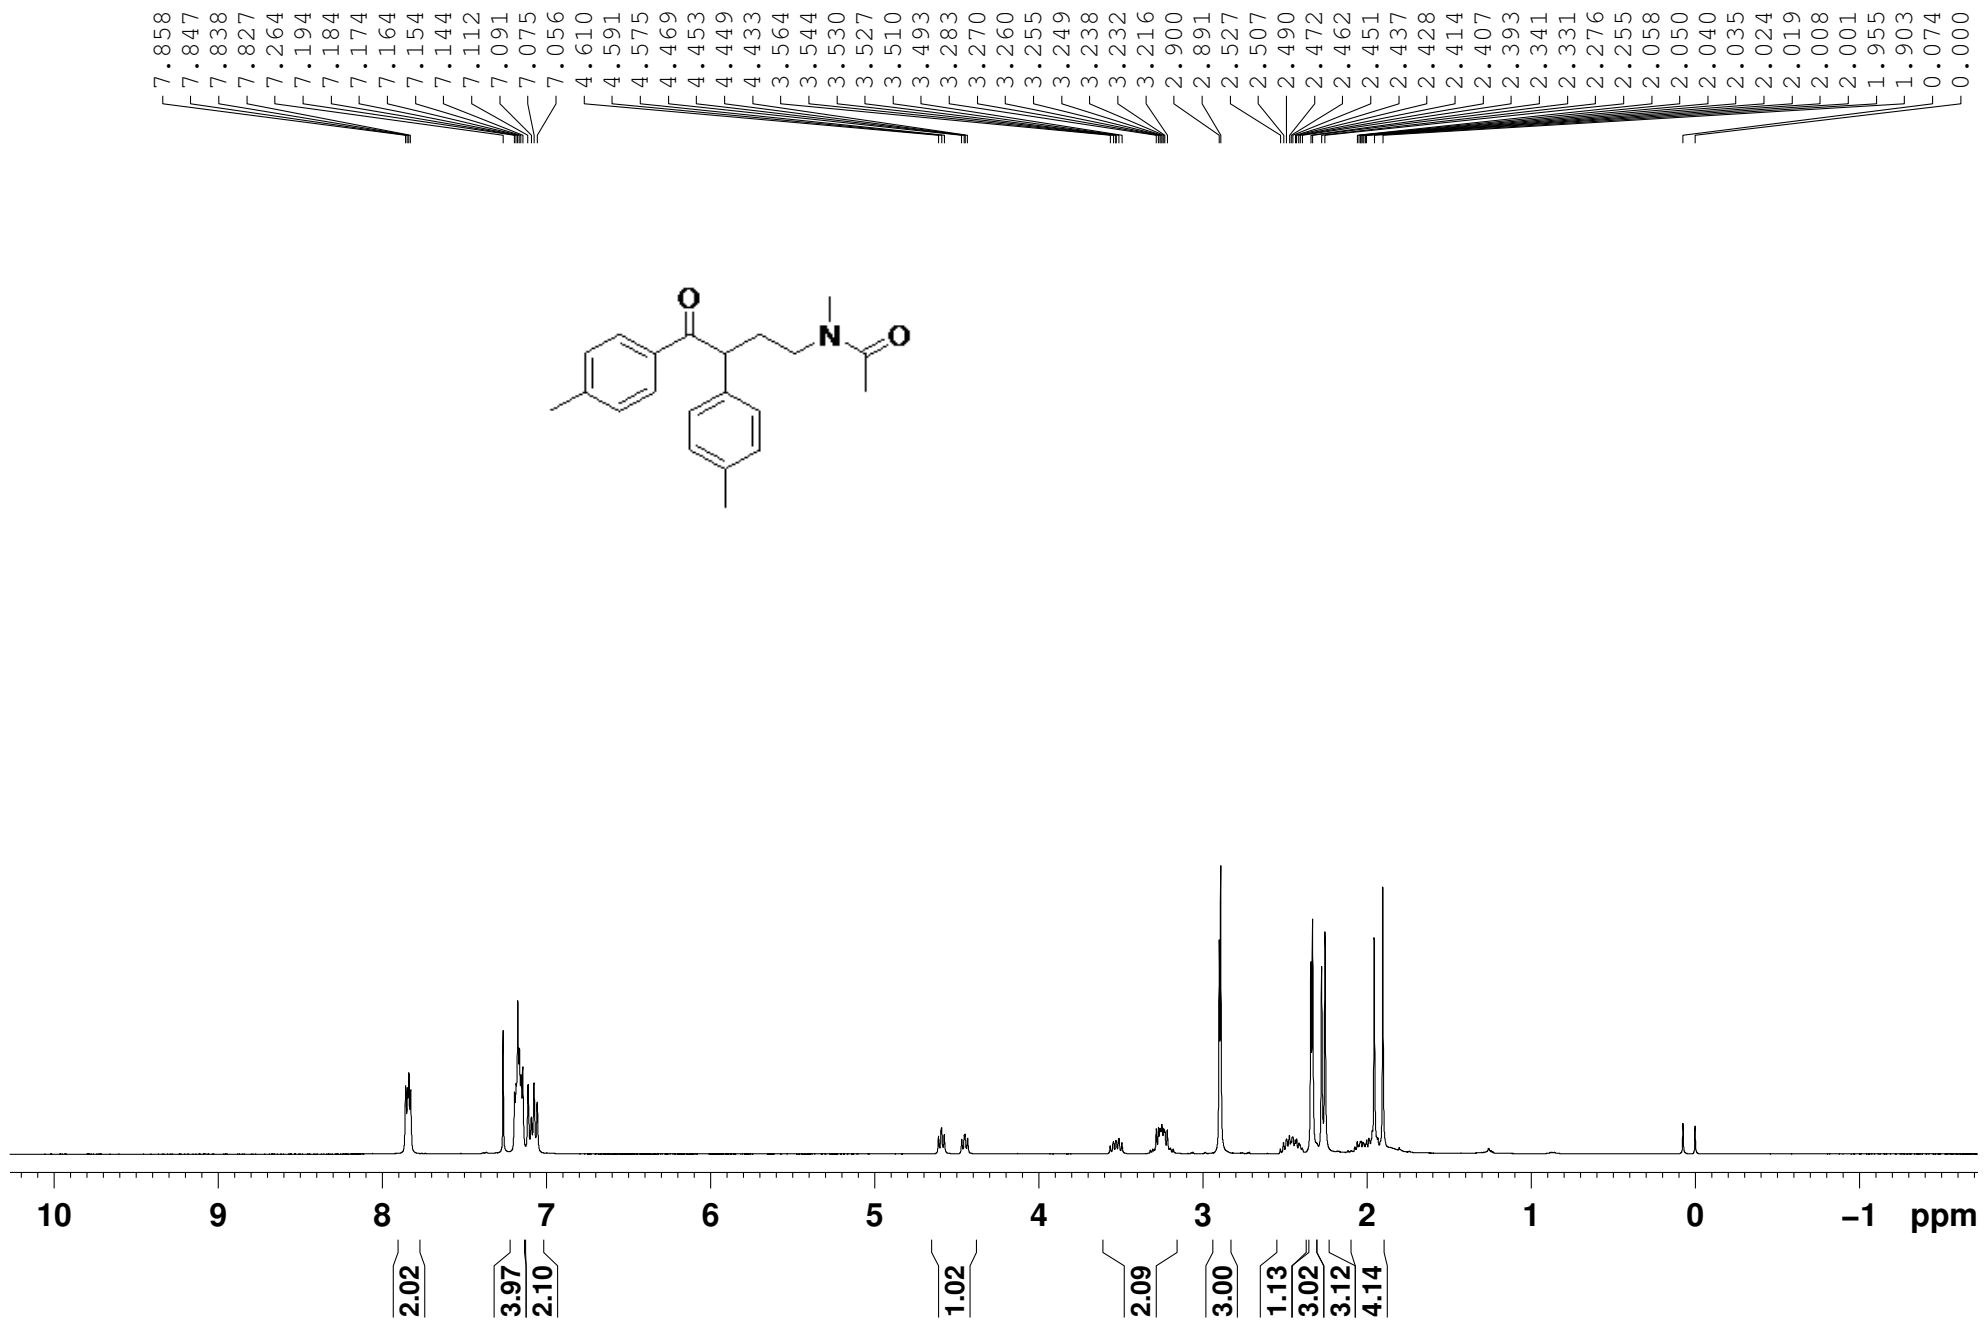

198.89  
198.31

170.58  
170.54  
144.01  
143.61  
137.10  
136.60  
136.43  
135.84  
133.92  
133.71  
129.90  
129.60  
129.29  
129.15  
128.83  
128.81  
127.90  
127.78

77.32  
77.00  
76.69

50.62  
50.14  
48.88  
45.86  
35.84  
33.06  
32.27  
31.44  
21.65  
21.54  
21.52  
21.03  
20.94

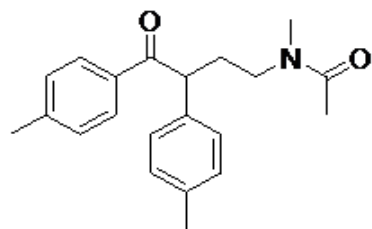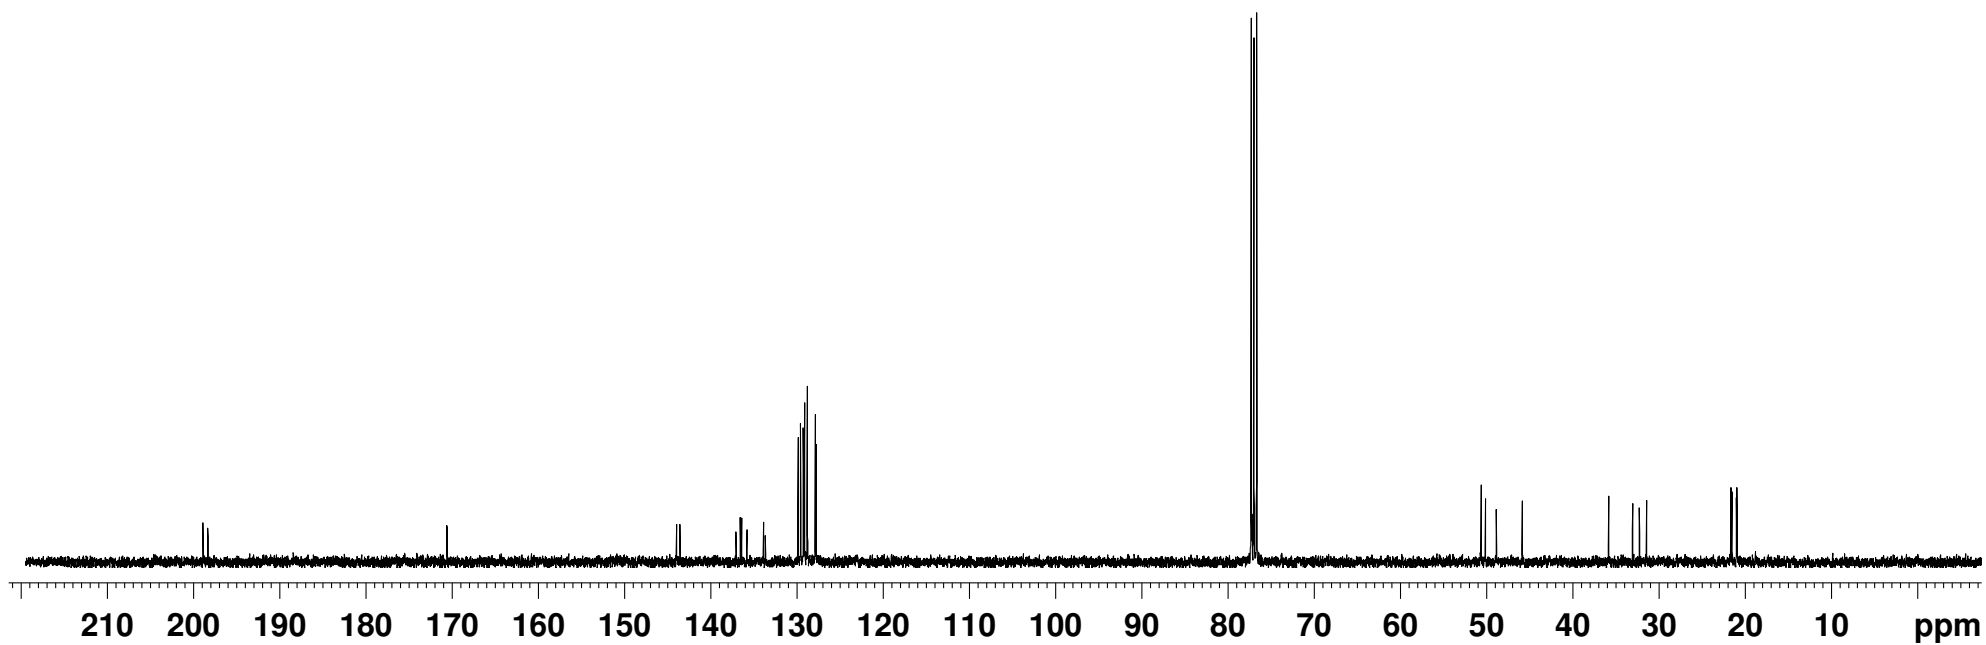

N-(3,4-Bis(4-methoxyphenyl)-4-oxobutyl)-N-methylacetamide (3ca)

7.948  
7.936  
7.931  
7.926  
7.918  
7.914  
7.275  
7.234  
7.212  
7.200  
7.178  
6.870  
6.865  
6.846  
6.823  
6.813  
6.791  
4.576  
4.558  
4.541  
4.434  
4.418  
4.413  
4.398  
3.812  
3.805  
3.747  
3.731  
3.574  
3.553  
3.539  
3.520  
3.502  
3.302  
3.279  
3.271  
3.266  
3.256  
3.238  
3.224  
3.216  
3.203  
3.196  
2.901  
2.889  
2.496  
2.478  
2.461  
2.445  
2.435  
2.425  
2.413  
2.400  
2.392  
2.062  
2.046  
2.039  
2.030  
2.023  
2.011  
1.989  
1.974  
1.956  
1.941  
1.927  
1.920  
1.902  
0.076  
-0.000

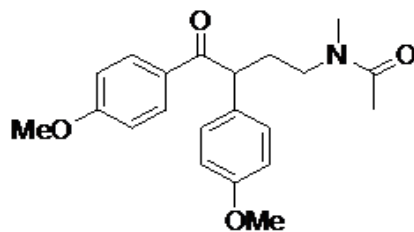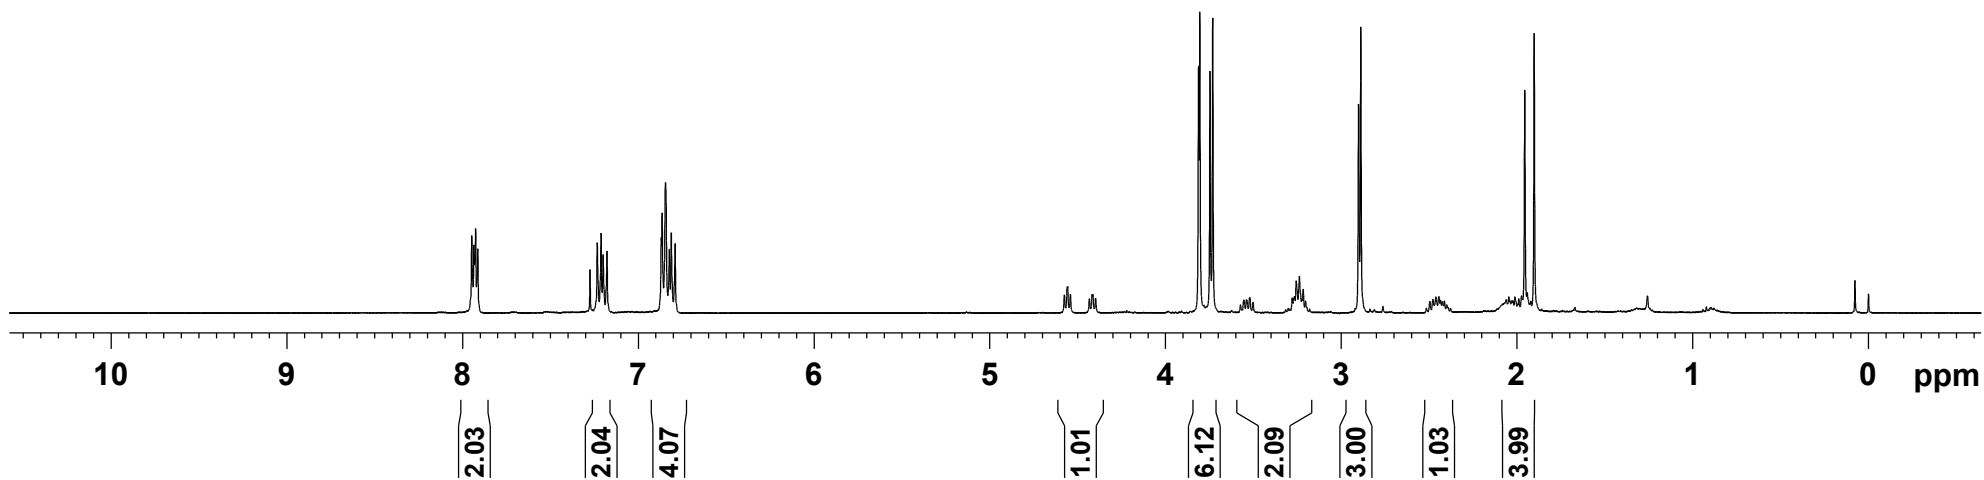

197.85  
197.23

170.57  
170.50  
163.43  
163.23  
158.75  
158.49

131.64  
130.99  
130.95  
129.32  
129.09  
128.97  
128.88  
114.56  
114.26  
113.75  
113.61

77.32  
77.00  
76.68

55.37  
55.32  
55.15  
55.11  
49.82  
49.35  
48.83  
45.80

35.81  
33.03  
32.29  
31.46

21.64  
21.01

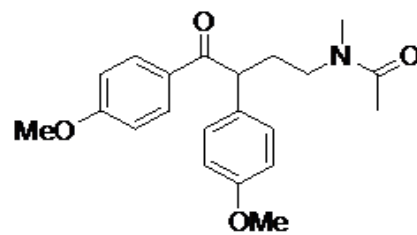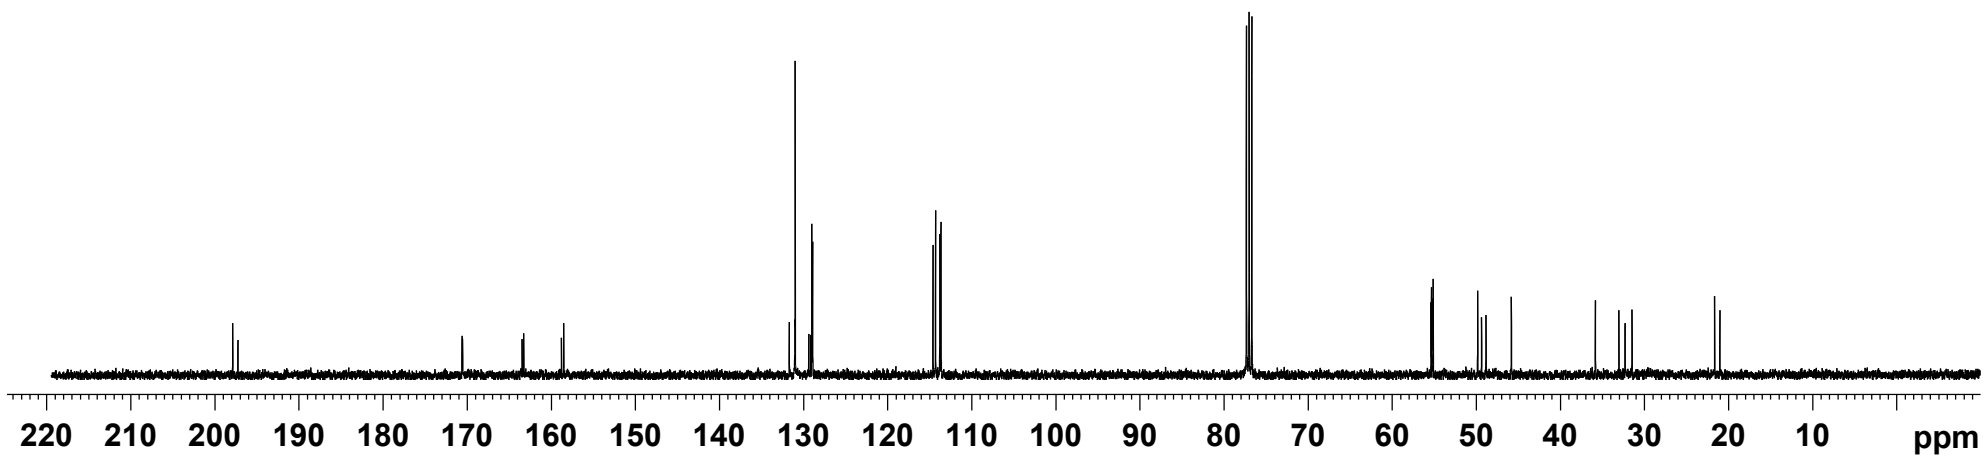

N-(3,4-Bis(4-chlorophenyl)-4-oxobutyl)-N-methylacetamide (3da)

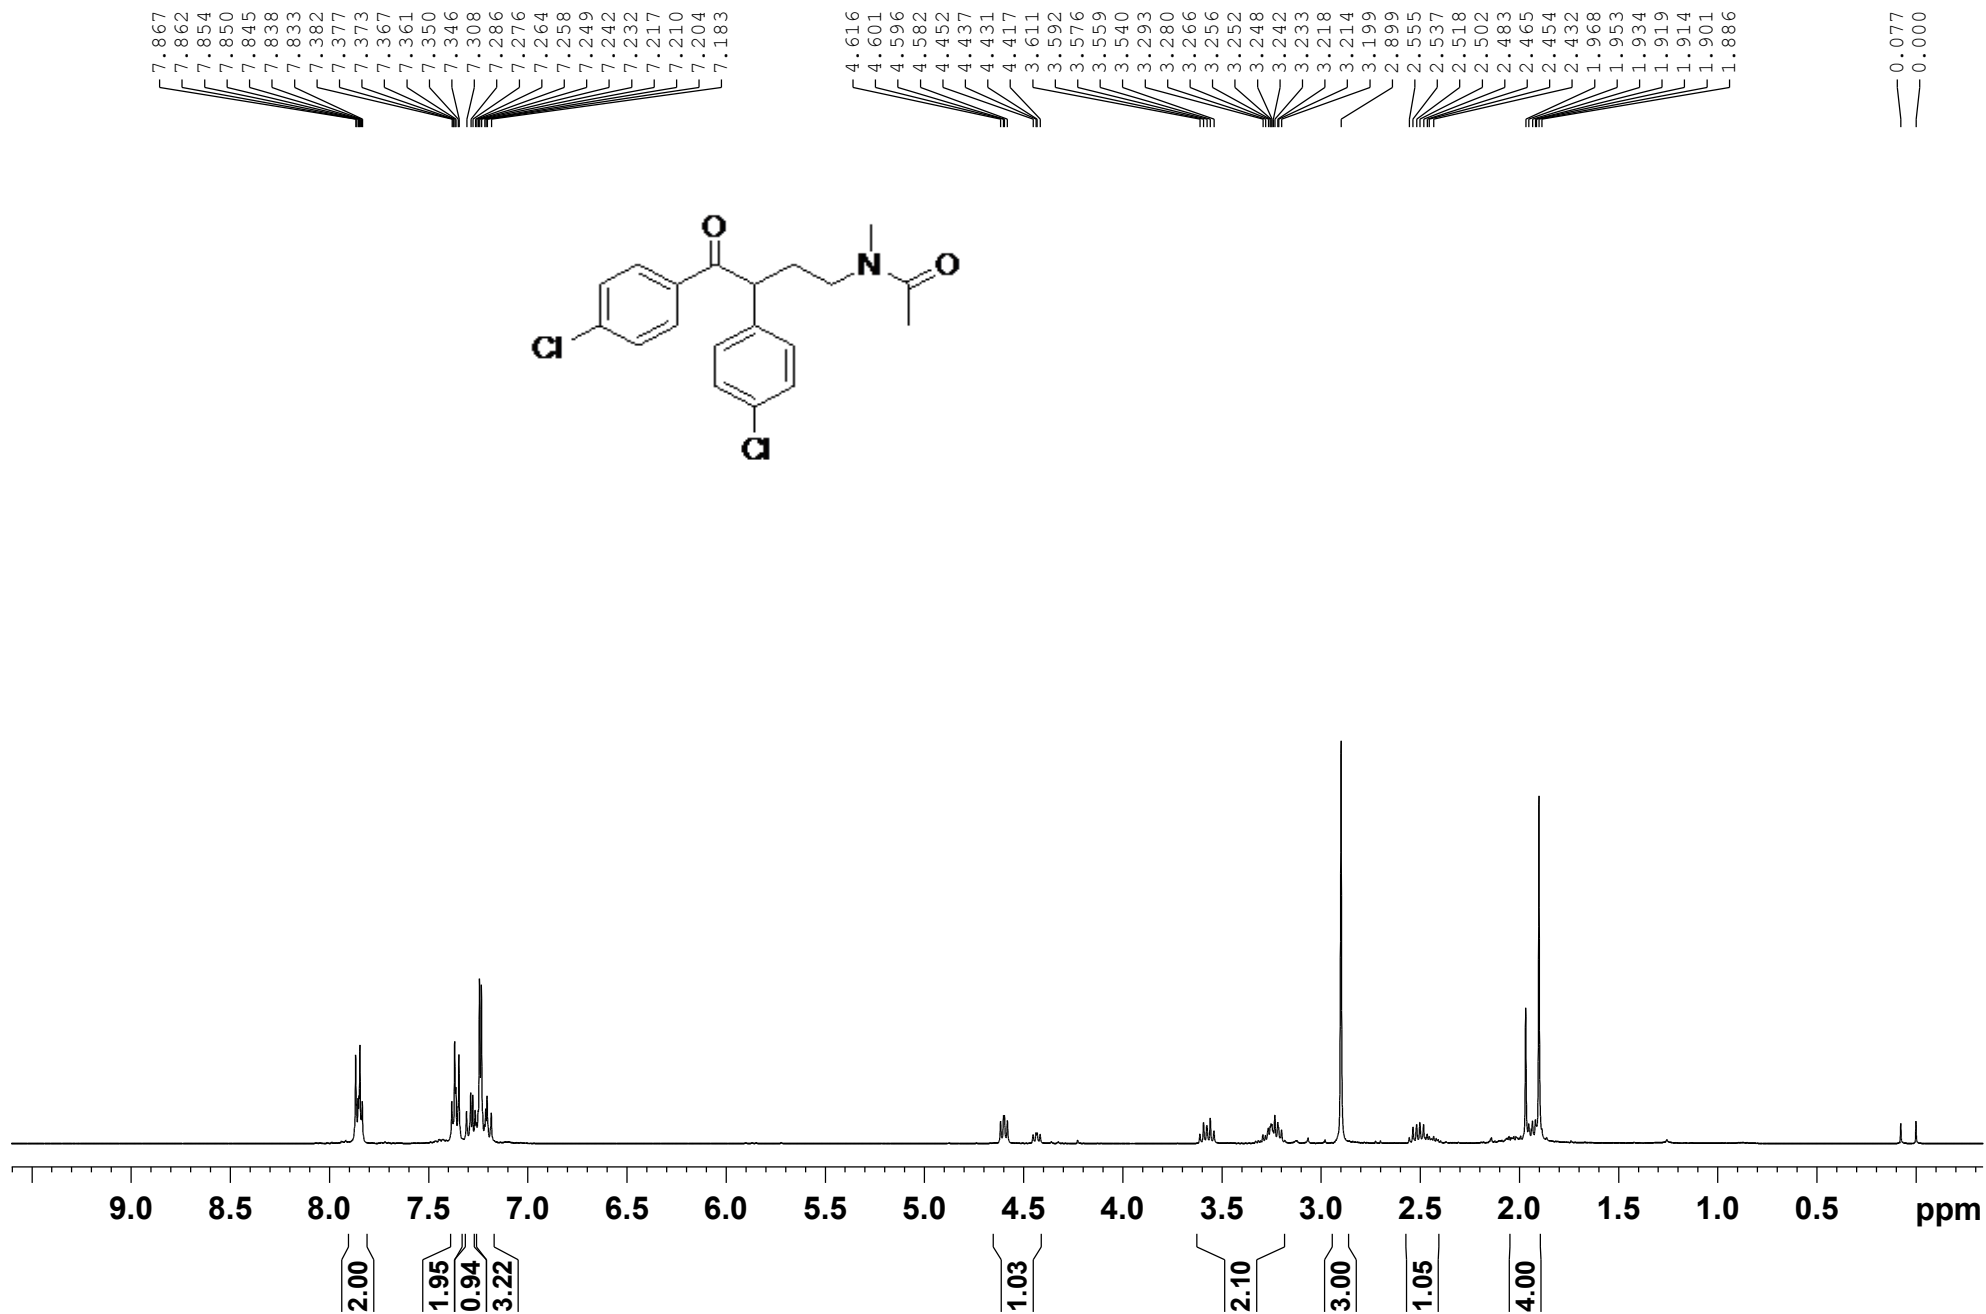

197.64  
196.96

170.76  
170.40

139.95  
139.54  
137.46  
136.79  
134.40  
134.12  
133.66  
133.17  
130.05  
130.00  
129.56  
129.34  
129.17  
129.05  
128.87

77.32  
77.00  
76.68

50.48  
50.01  
48.64  
45.71

35.84  
33.07  
32.14  
31.40

21.62  
21.02

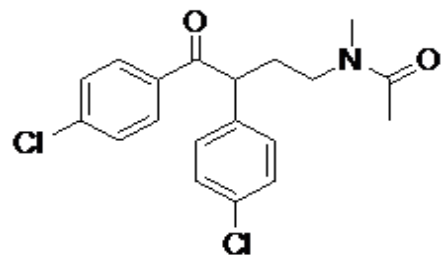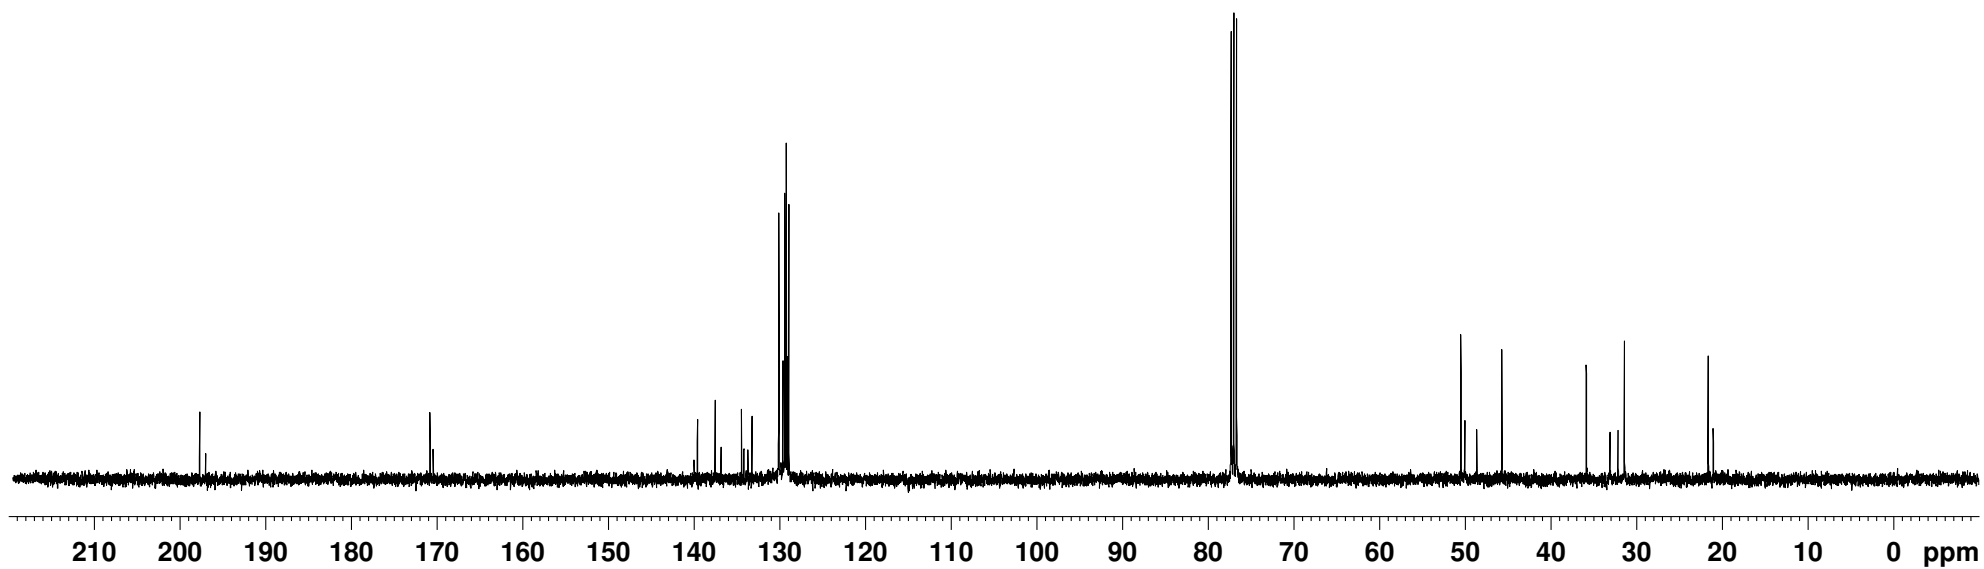



N-(3,4-Bis(4-fluorophenyl)-4-oxobutyl)-N-methylacetamide (3ea)

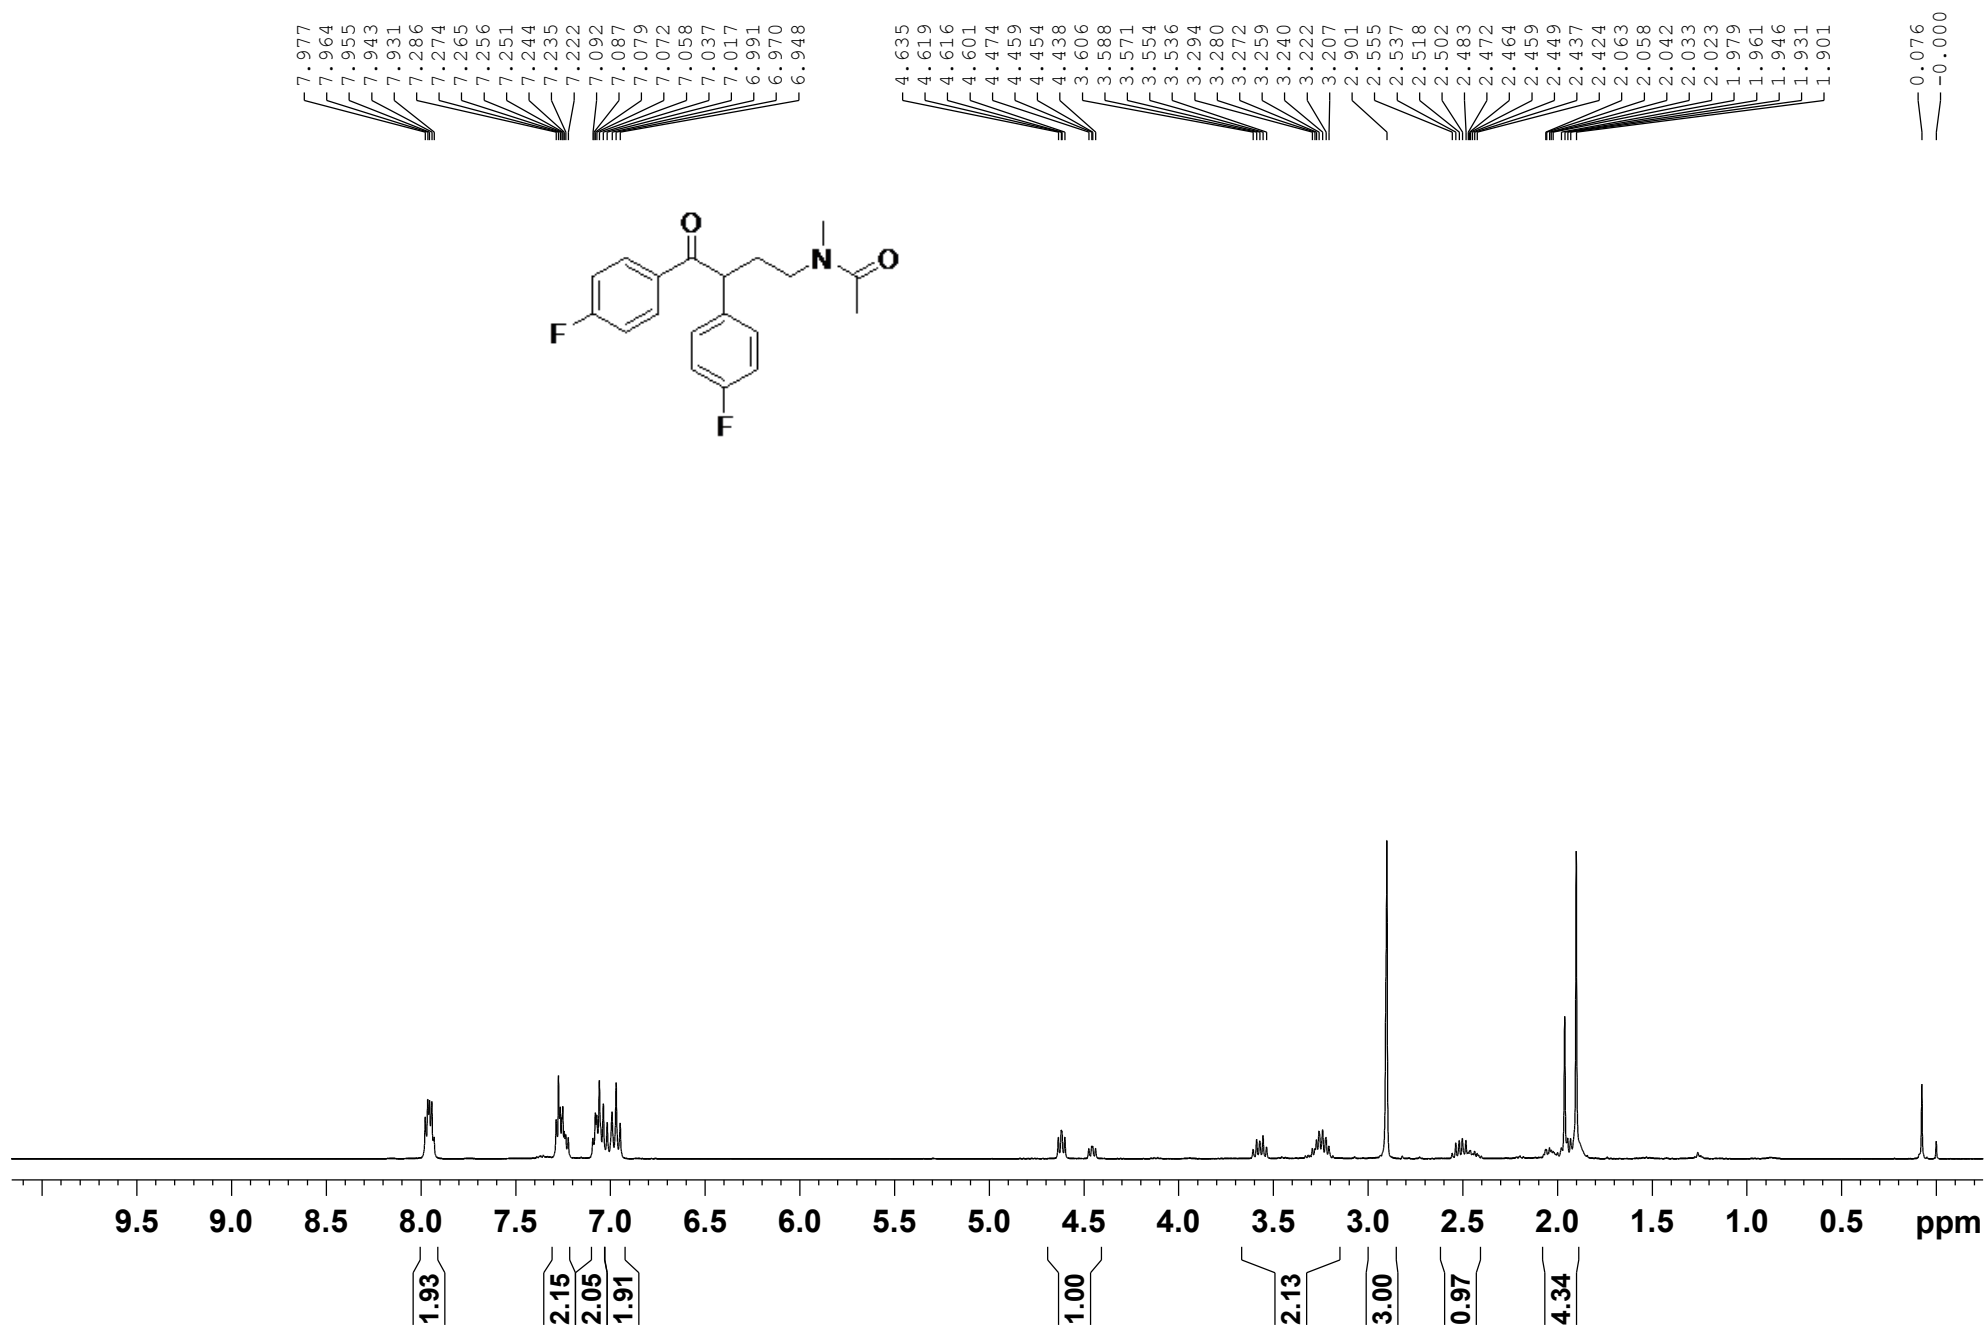

197.54  
196.84

170.74  
170.43  
166.86  
164.32  
163.12  
160.67

134.87  
134.84  
134.21  
132.58  
131.37  
131.28  
129.59  
129.51  
129.47  
129.39  
116.43  
116.22  
116.00  
115.77  
115.55

77.32  
77.00  
76.68

50.26  
49.81  
48.69  
45.74

35.84  
33.07  
32.36  
31.59

21.62  
21.01

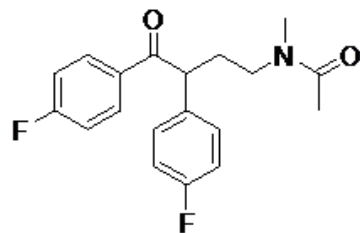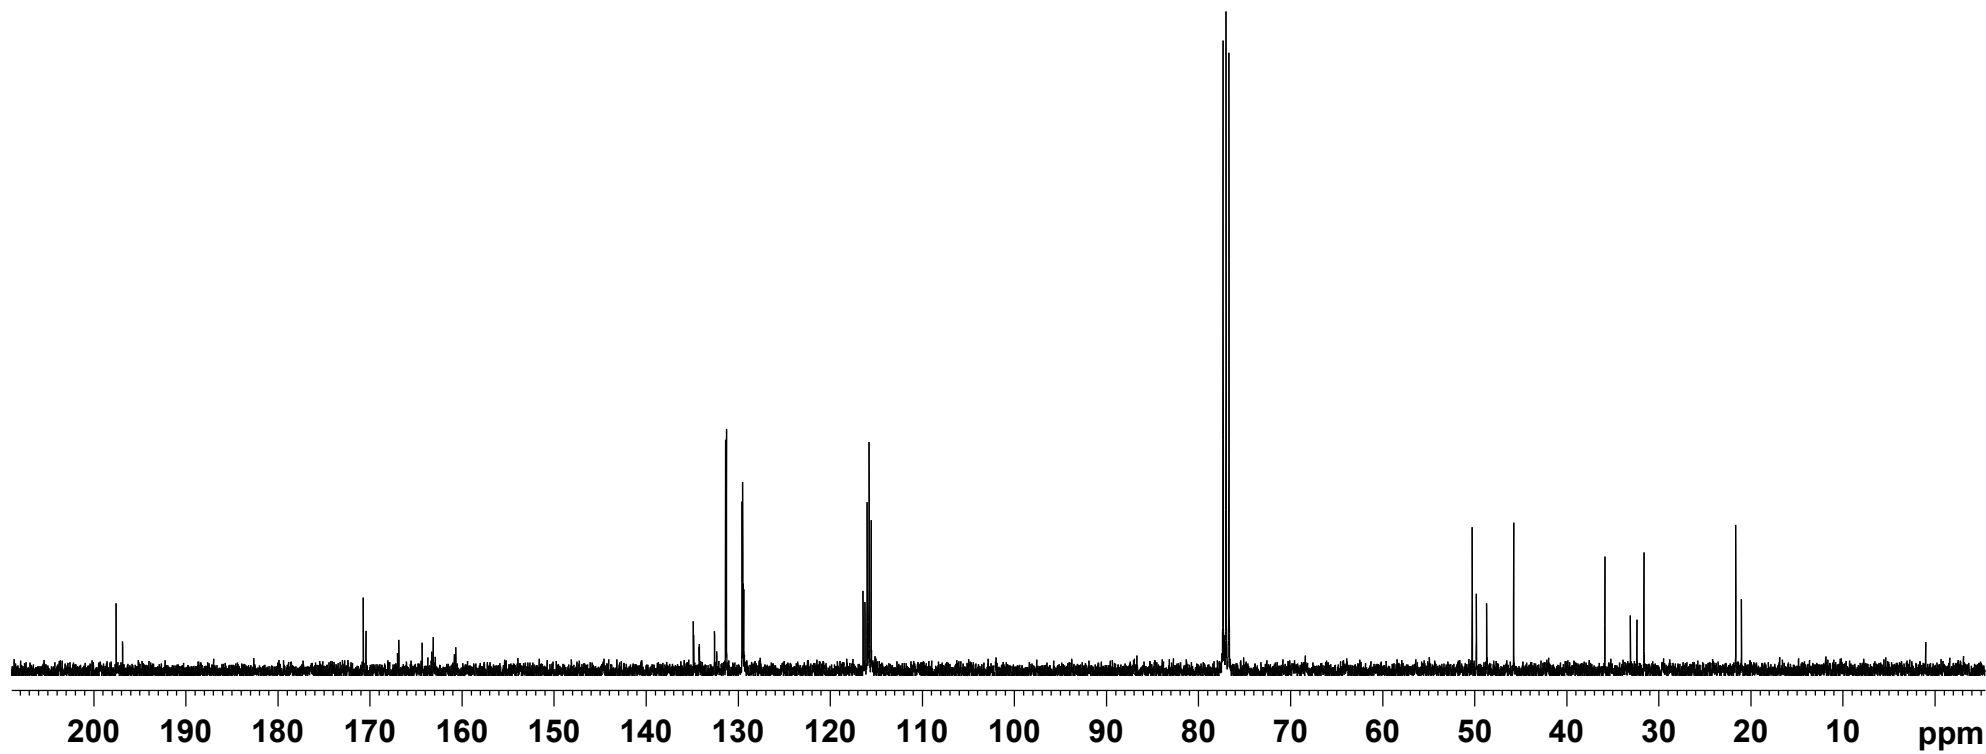

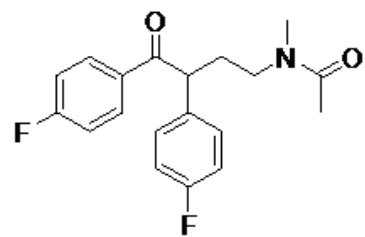

--104.155  
--104.167  
--105.019  
--105.031  
--114.243  
--115.178  
--115.190

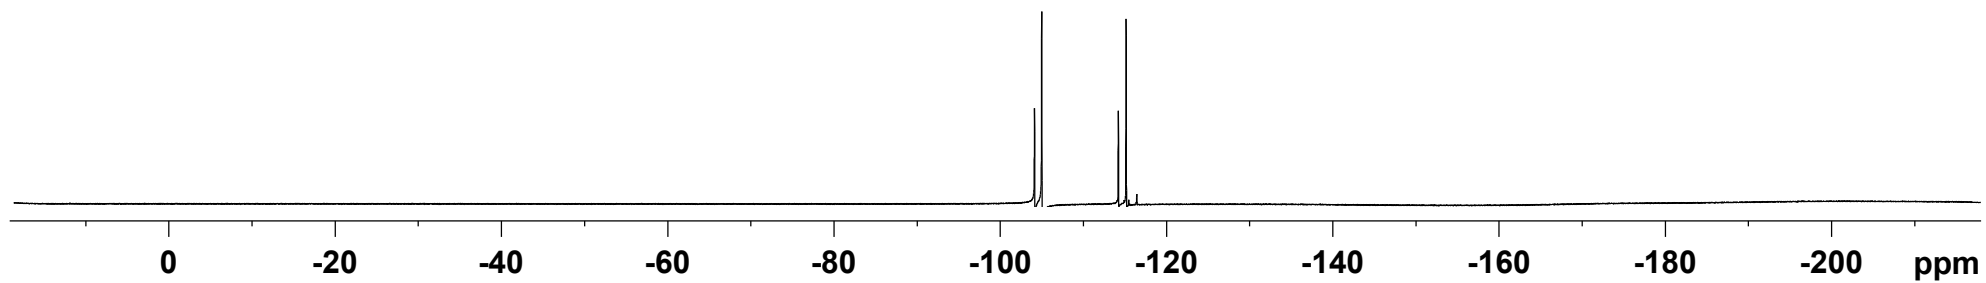

N-Methyl-N-(4-oxo-3,4-dio-tolylbutyl)acetamide (3fa)

7.498  
7.481  
7.394  
7.390  
7.372  
7.279  
7.264  
7.247  
7.245  
7.229  
7.226  
7.173  
7.153  
7.146  
7.142  
7.133  
7.130  
7.126  
7.122  
7.112  
7.102  
7.093  
7.084  
7.076  
7.072  
7.068  
4.711  
4.698  
4.690  
4.677  
4.584  
4.569  
4.563  
4.548  
4.548  
3.466  
3.450  
3.445  
3.436  
3.429  
3.421  
3.416  
3.401  
3.394  
3.388  
3.381  
3.368  
3.357  
3.344  
3.332  
3.319  
3.281  
3.266  
3.256  
3.242  
2.966  
2.937  
2.566  
2.550  
2.545  
2.537  
2.532  
2.516  
2.511  
2.499  
2.495  
2.488  
2.476  
2.465  
2.454  
2.335  
2.302  
2.275  
2.268  
2.064  
2.016  
2.003  
1.997  
1.980  
1.963  
1.902  
1.888  
1.882  
1.867  
1.861  
1.854  
1.847  
-0.000

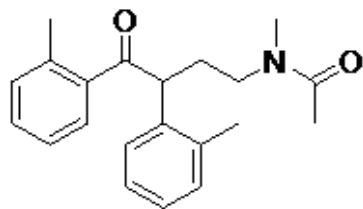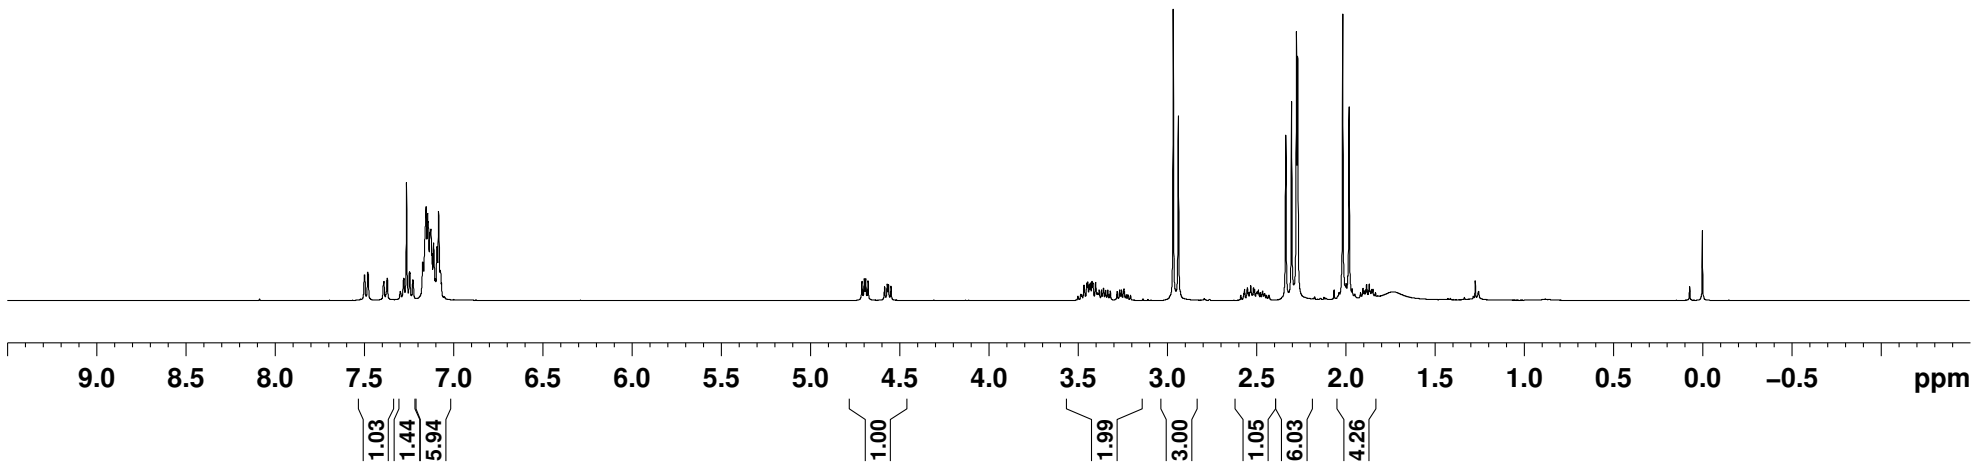

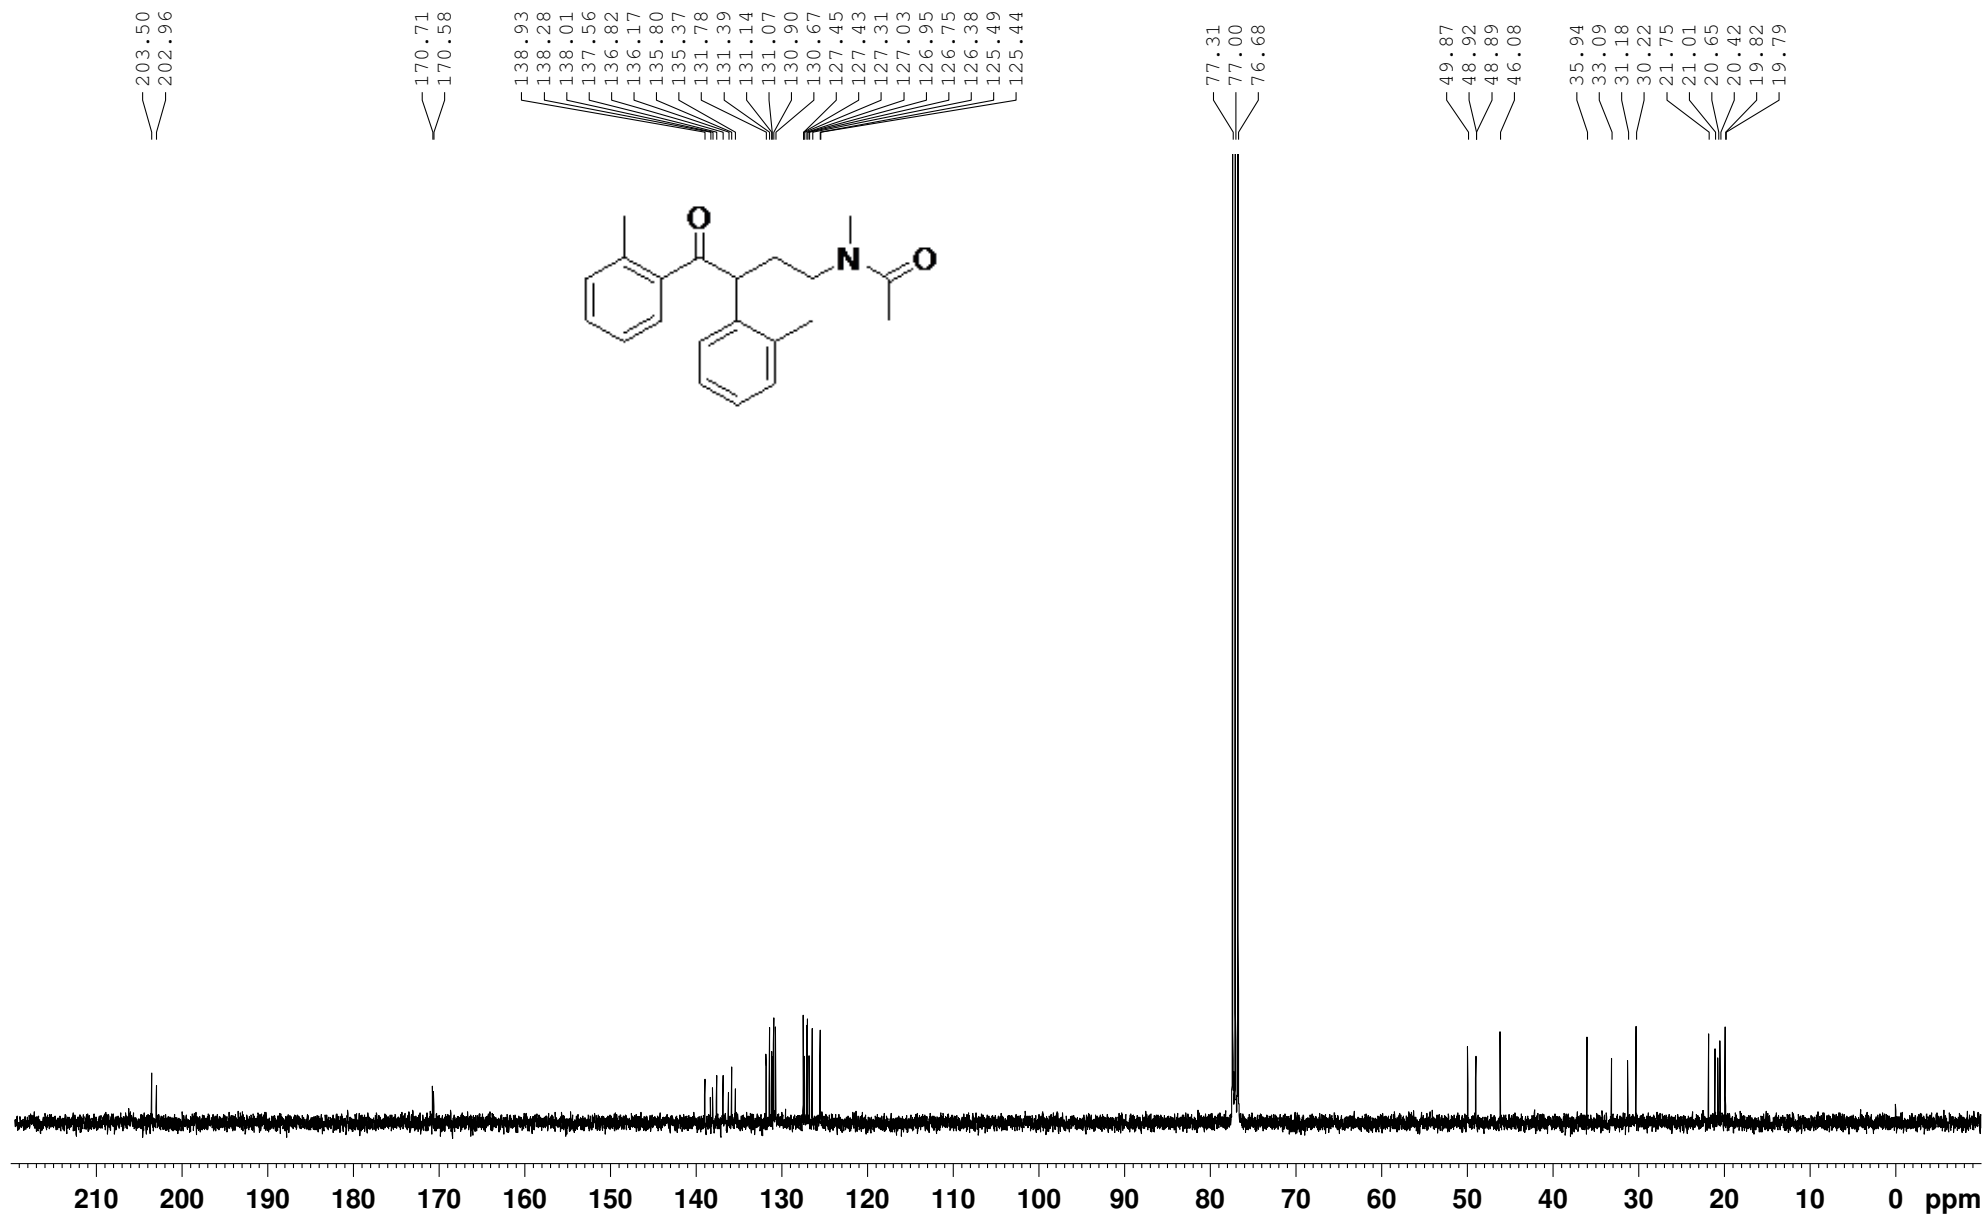

N-Methyl-N-(3-methyl-4-oxo-3,4-diphenylbutyl)acetamide (3ga)

7.485  
7.465  
7.442  
7.422  
7.411  
7.391  
7.374  
7.357  
7.332  
7.311  
7.290  
7.279  
7.270  
7.255  
7.234  
7.214  
7.193

3.382  
3.367  
3.349  
3.341  
3.333  
3.325  
3.308  
3.177  
3.162  
3.151  
3.140  
3.130  
3.116  
3.099  
3.088  
3.068  
3.052  
2.799  
2.790  
2.249  
2.238  
2.224  
2.196  
1.960  
1.833  
1.683  
1.673  
0.079  
0.000

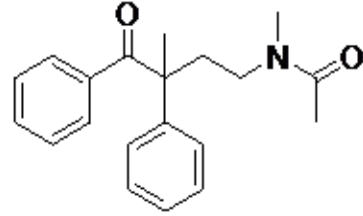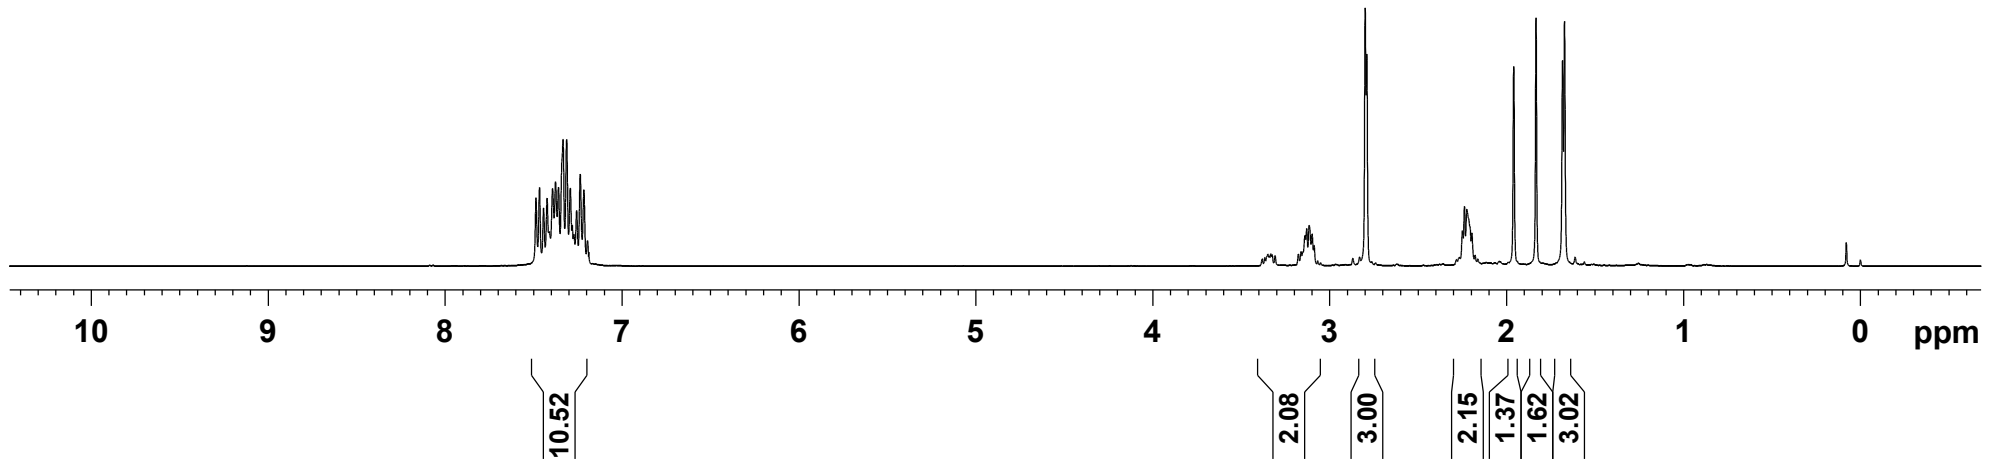

203.15  
202.48

170.22  
170.13

143.20  
142.74  
136.46  
135.86  
132.03  
131.64  
129.51  
129.35  
129.17  
128.97  
128.06  
127.91  
127.35  
126.99  
125.99  
125.92

77.32  
77.00  
76.68

53.35  
53.18  
46.91  
43.76  
39.00  
36.99  
35.76  
33.07

23.59  
23.06  
21.70  
20.59

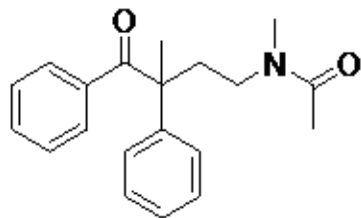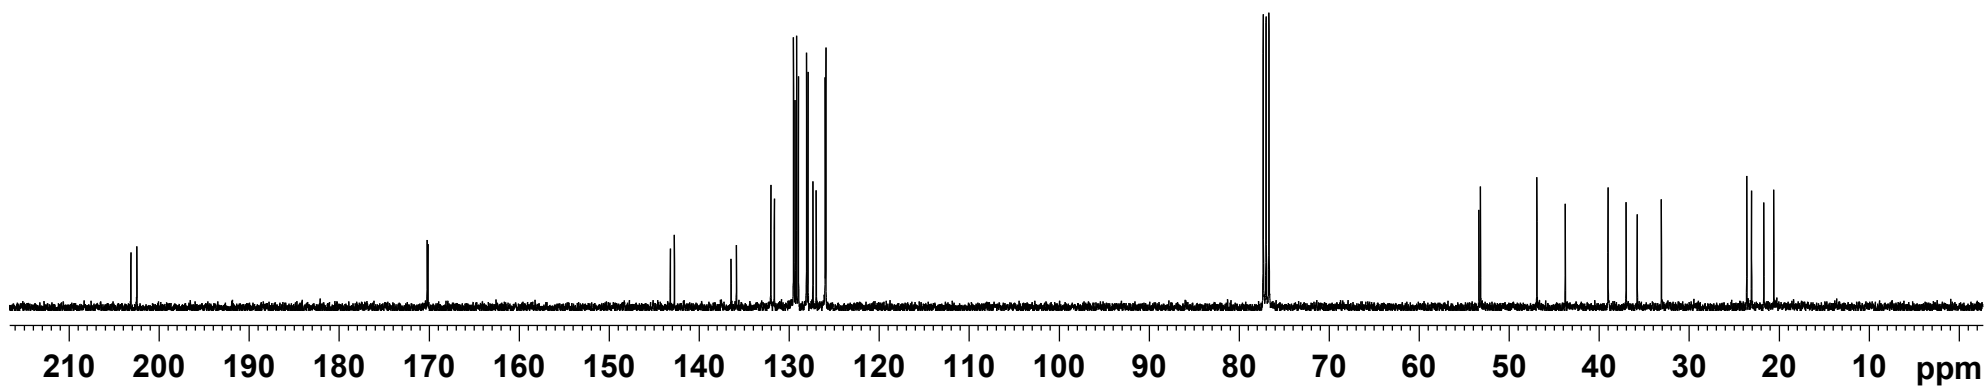

N-Methyl-N-(3-methyl-4-oxo-3,4-dip-tolylbutyl)acetamide (3ha)

7.426  
7.406  
7.397  
7.376  
7.270  
7.193  
7.171  
7.164  
7.153  
7.142  
7.133  
7.052  
7.032  
7.011

3.347  
3.332  
3.320  
3.314  
3.306  
3.299  
3.289  
3.273  
3.178  
3.173  
3.164  
3.152  
3.146  
3.137  
3.118  
3.106  
3.094  
3.077  
3.071  
3.059  
3.052  
3.035  
2.805  
2.798  
2.348  
2.327  
2.297  
2.285  
2.205  
2.196  
2.184  
2.181  
2.163  
2.155  
1.965  
1.849  
1.658  
1.645

0.075  
-0.000

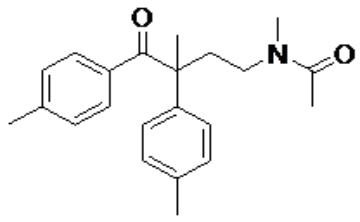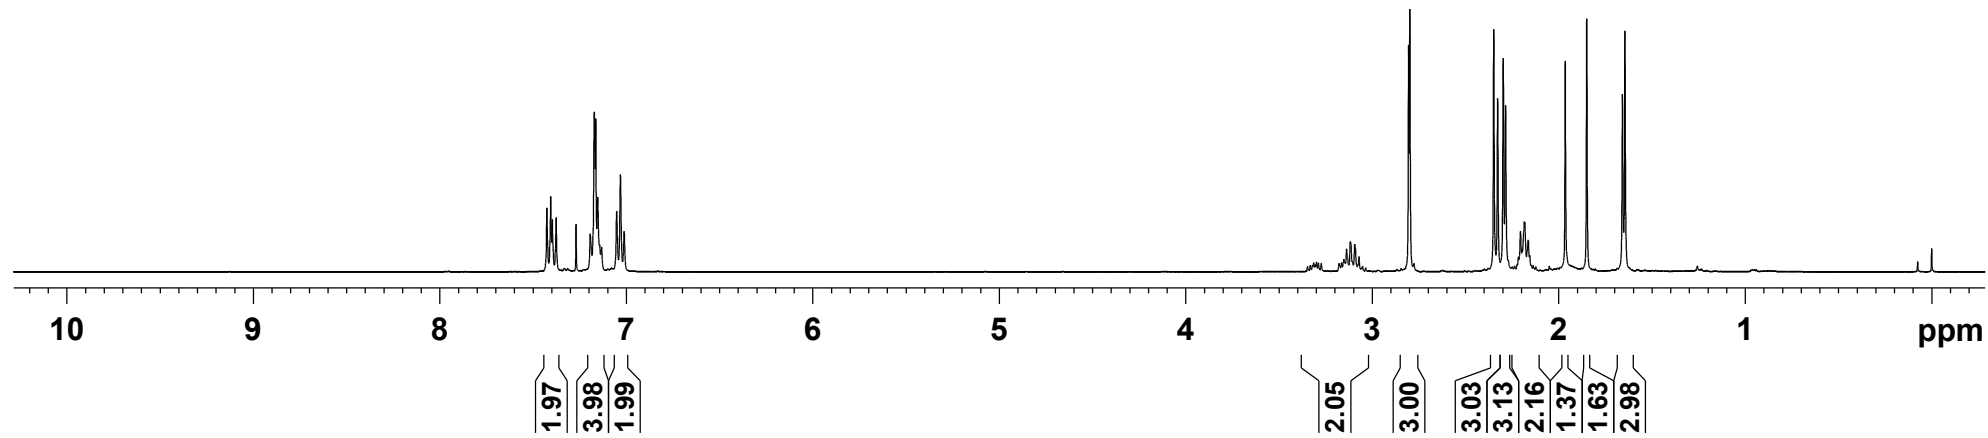



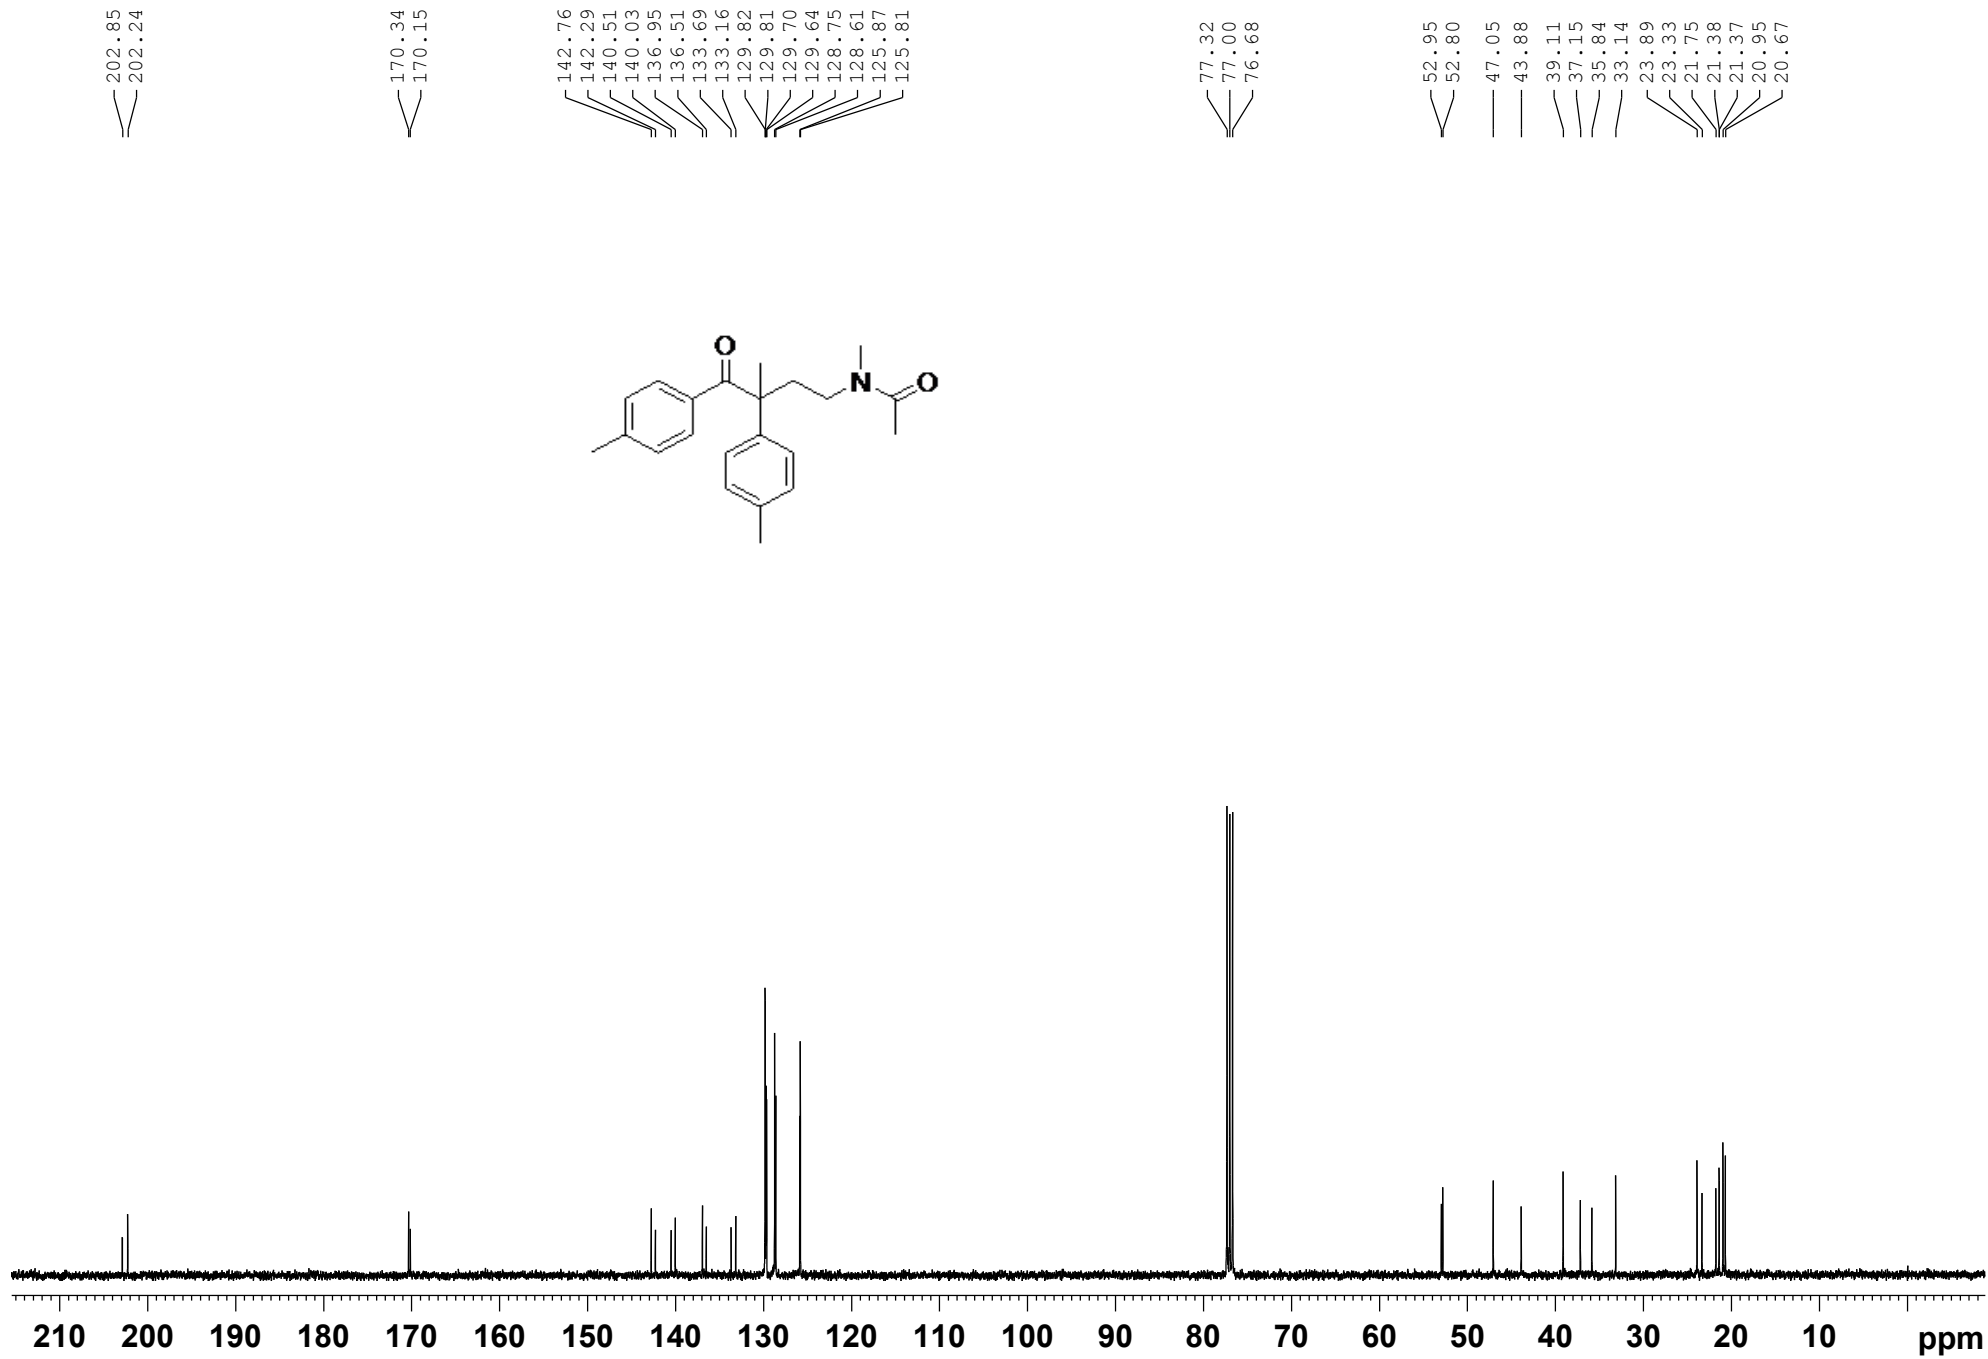

N-(3,4-Bis(4-methoxyphenyl)-3-methyl-4-oxobutyl)-N-methylacetamide (3ia)

7.544  
7.521  
7.515  
7.497  
7.276  
7.216  
7.194  
7.191  
7.169  
6.915  
6.893  
6.887  
6.865  
6.740  
6.723  
6.718  
6.710  
6.701  
3.809  
3.793  
3.776  
3.764  
3.340  
3.325  
3.314  
3.308  
3.300  
3.291  
3.283  
3.267  
3.188  
3.174  
3.166  
3.151  
3.134  
3.128  
3.110  
3.093  
3.087  
3.069  
3.054  
3.033  
2.816  
2.803  
2.203  
2.192  
2.172  
2.150  
1.970  
1.863  
1.658  
1.647  
0.076  
-0.000

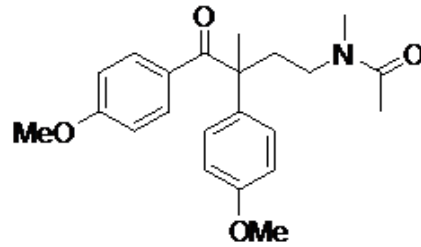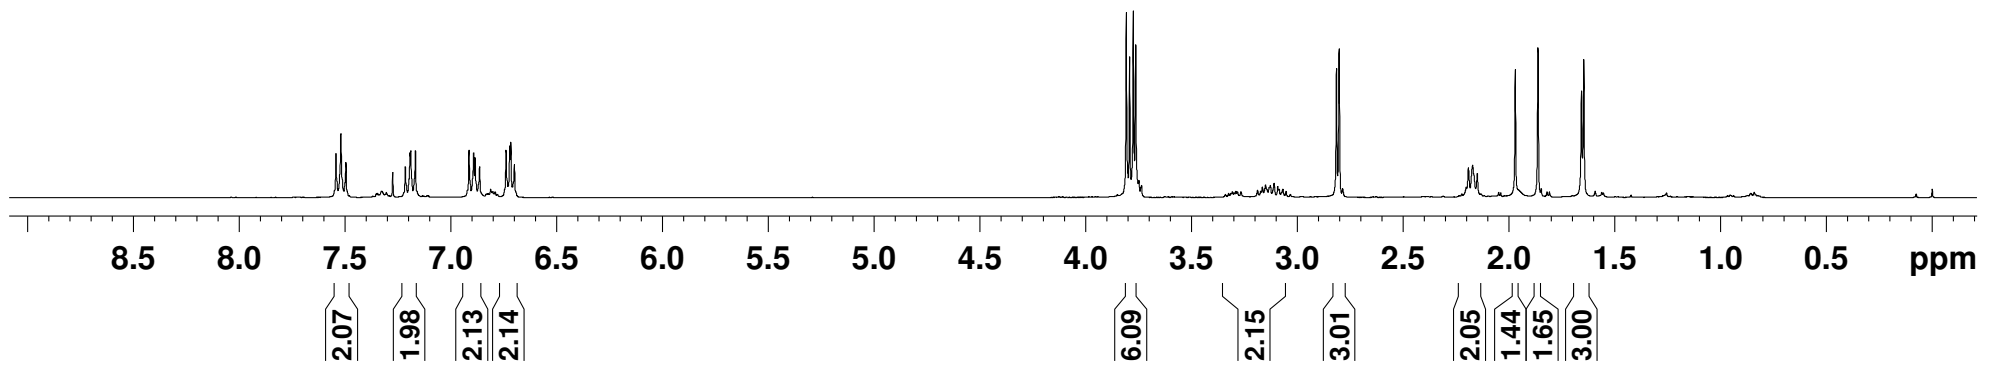

201.65  
201.06

170.30  
170.13  
162.46  
162.19  
158.59  
158.36

135.83  
135.29  
132.09  
131.96  
128.84  
128.32  
127.07  
127.04  
114.44  
114.29  
113.24  
113.10

77.32  
77.00  
76.68  
55.27  
55.22  
55.19  
55.15  
52.50  
52.35  
47.07  
43.91  
39.29  
37.26  
35.87  
33.14  
24.22  
23.65  
21.75  
20.70

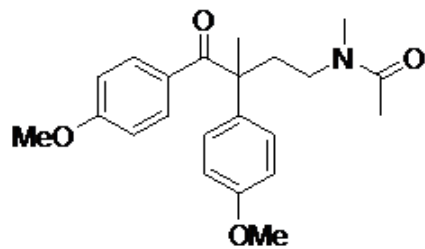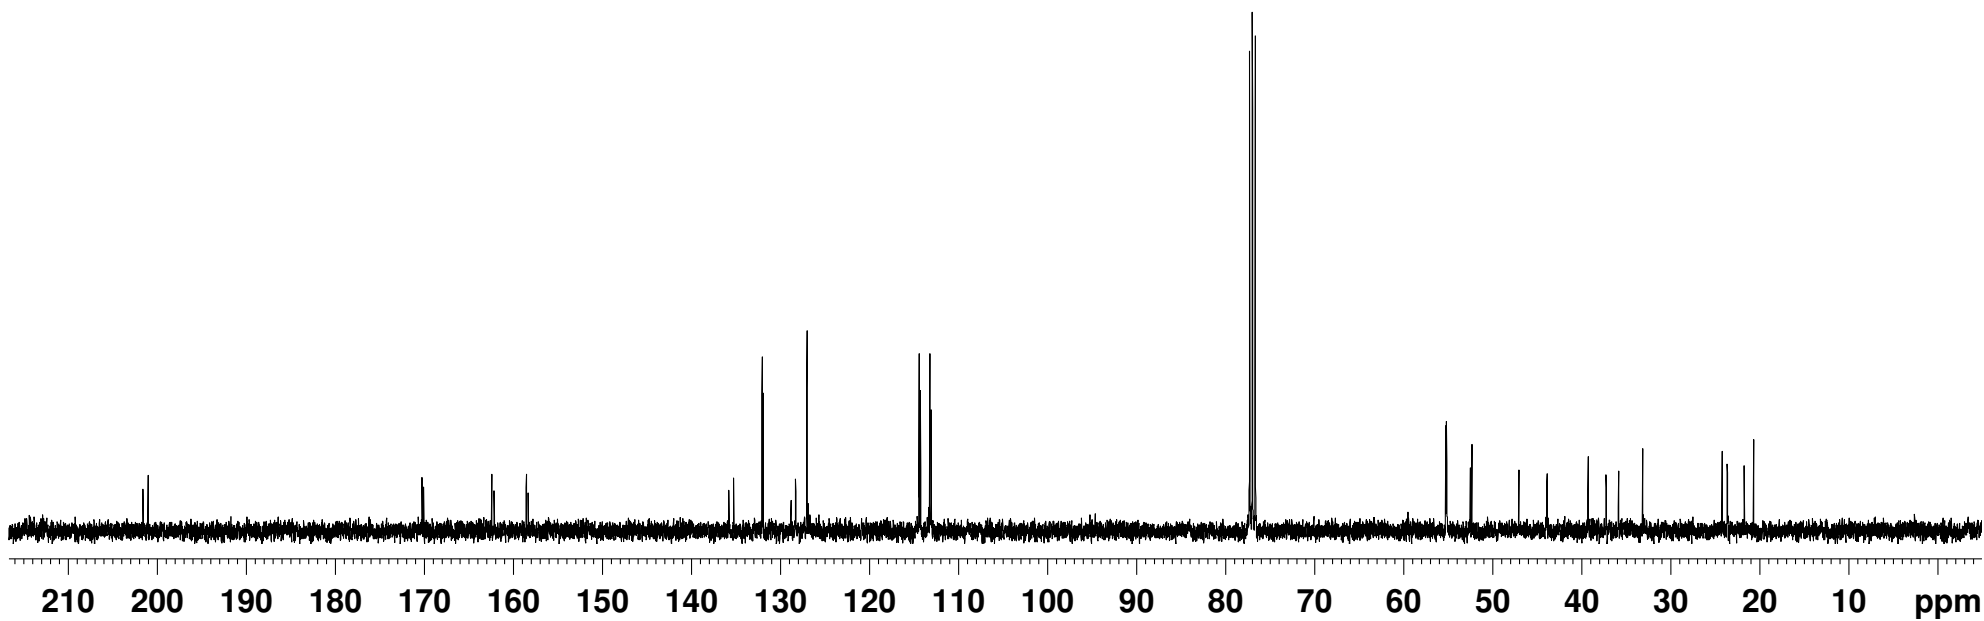

N-(3,4-Bis(4-chlorophenyl)-3-methyl-4-oxobutyl)-N-methylacetamide (3ja)

7.440  
7.419  
7.407  
7.387  
7.370  
7.350  
7.329  
7.287  
7.254  
7.245  
7.230  
7.224  
7.208  
7.202

3.343  
3.329  
3.311  
3.302  
3.296  
3.285  
3.270  
3.182  
3.168  
3.156  
3.138  
3.113  
3.095  
2.845  
2.813  
2.239  
2.219  
2.205  
2.192  
2.180  
2.166  
2.152  
2.145  
2.132  
1.973  
1.908  
1.667  
0.079  
0.000

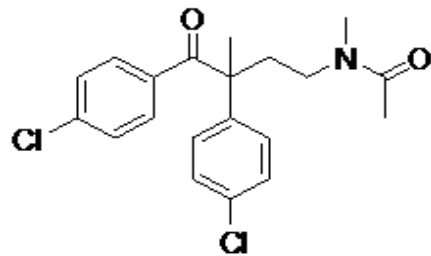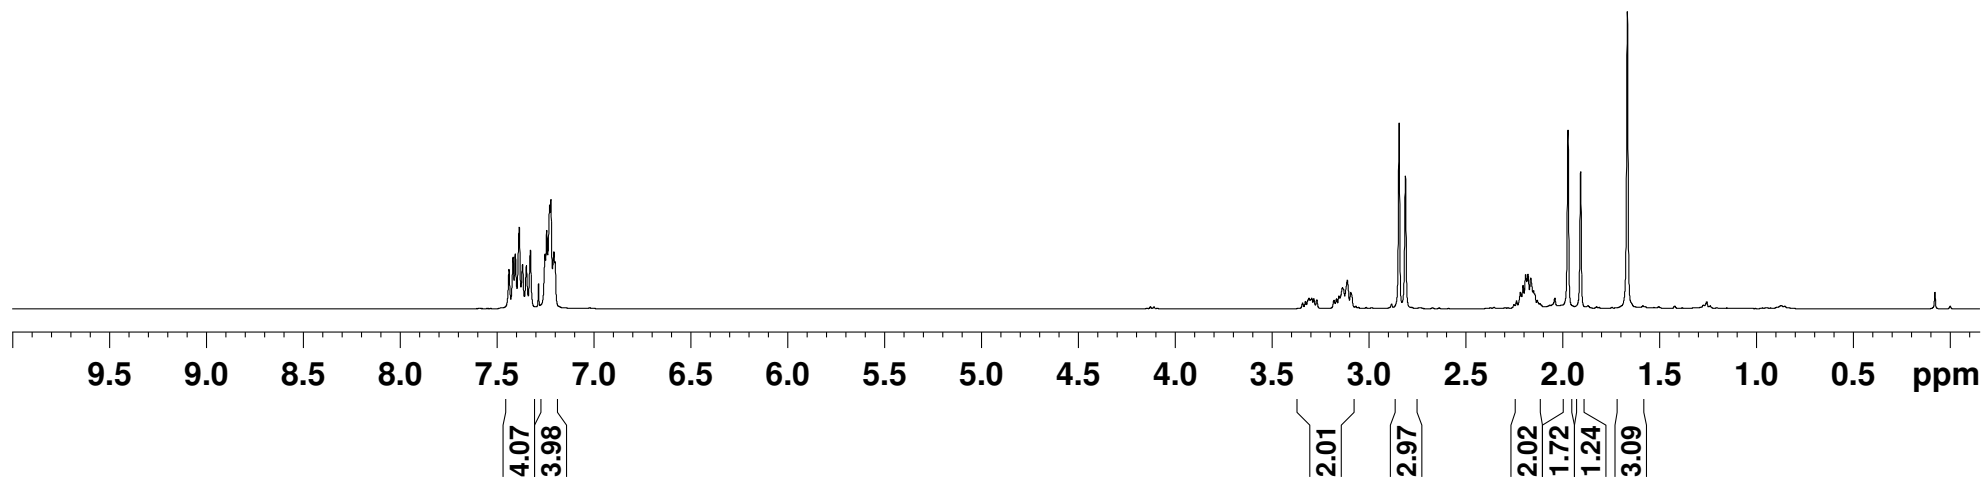

< 201.24  
< 200.59

< 170.20  
< 170.13  
141.62  
141.14  
138.74  
138.30  
134.18  
133.61  
133.57  
133.16  
130.99  
130.85  
129.50  
129.26  
128.51  
128.36  
127.40  
127.29

< 77.31  
< 77.00  
< 76.68

< 53.01  
< 52.81  
< 46.80  
< 43.71  
< 39.09  
< 36.95  
< 35.92  
< 33.12  
< 23.49  
< 23.07  
< 21.69  
< 20.70

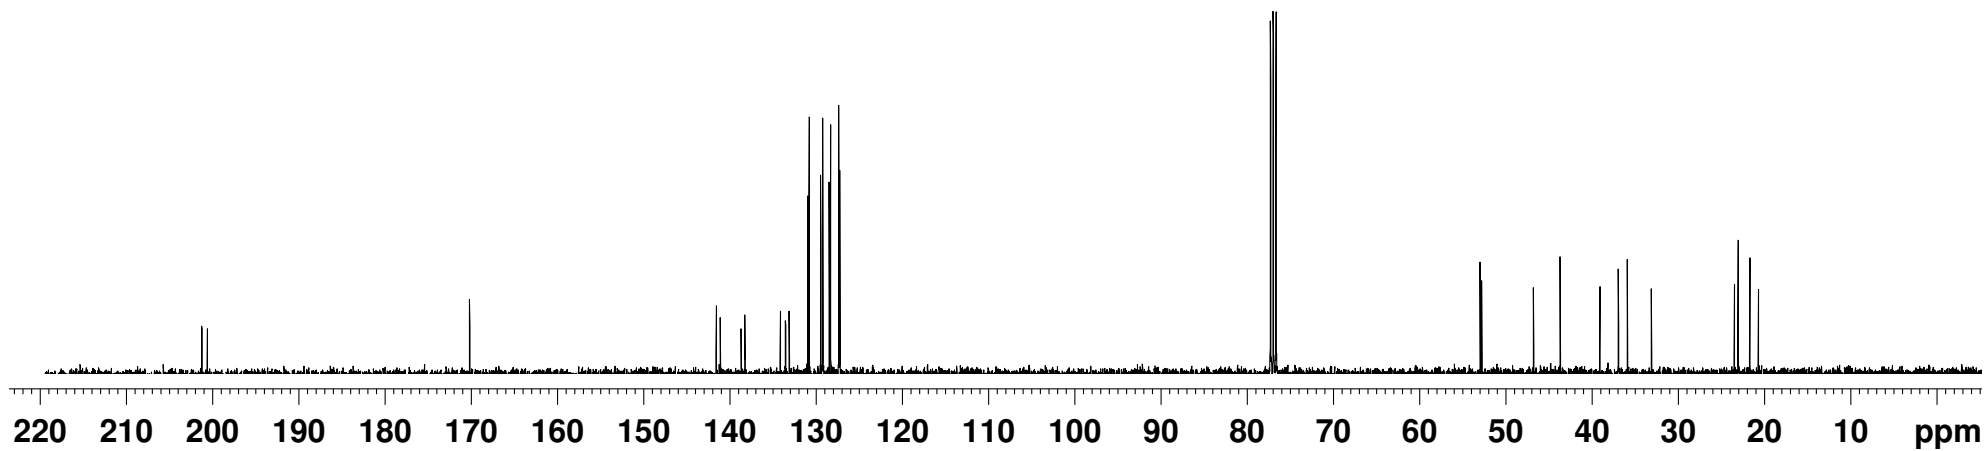

N-(3,4-Bis(4-fluorophenyl)-3-methyl-4-oxobutyl)-N-methylacetamide (3ka)

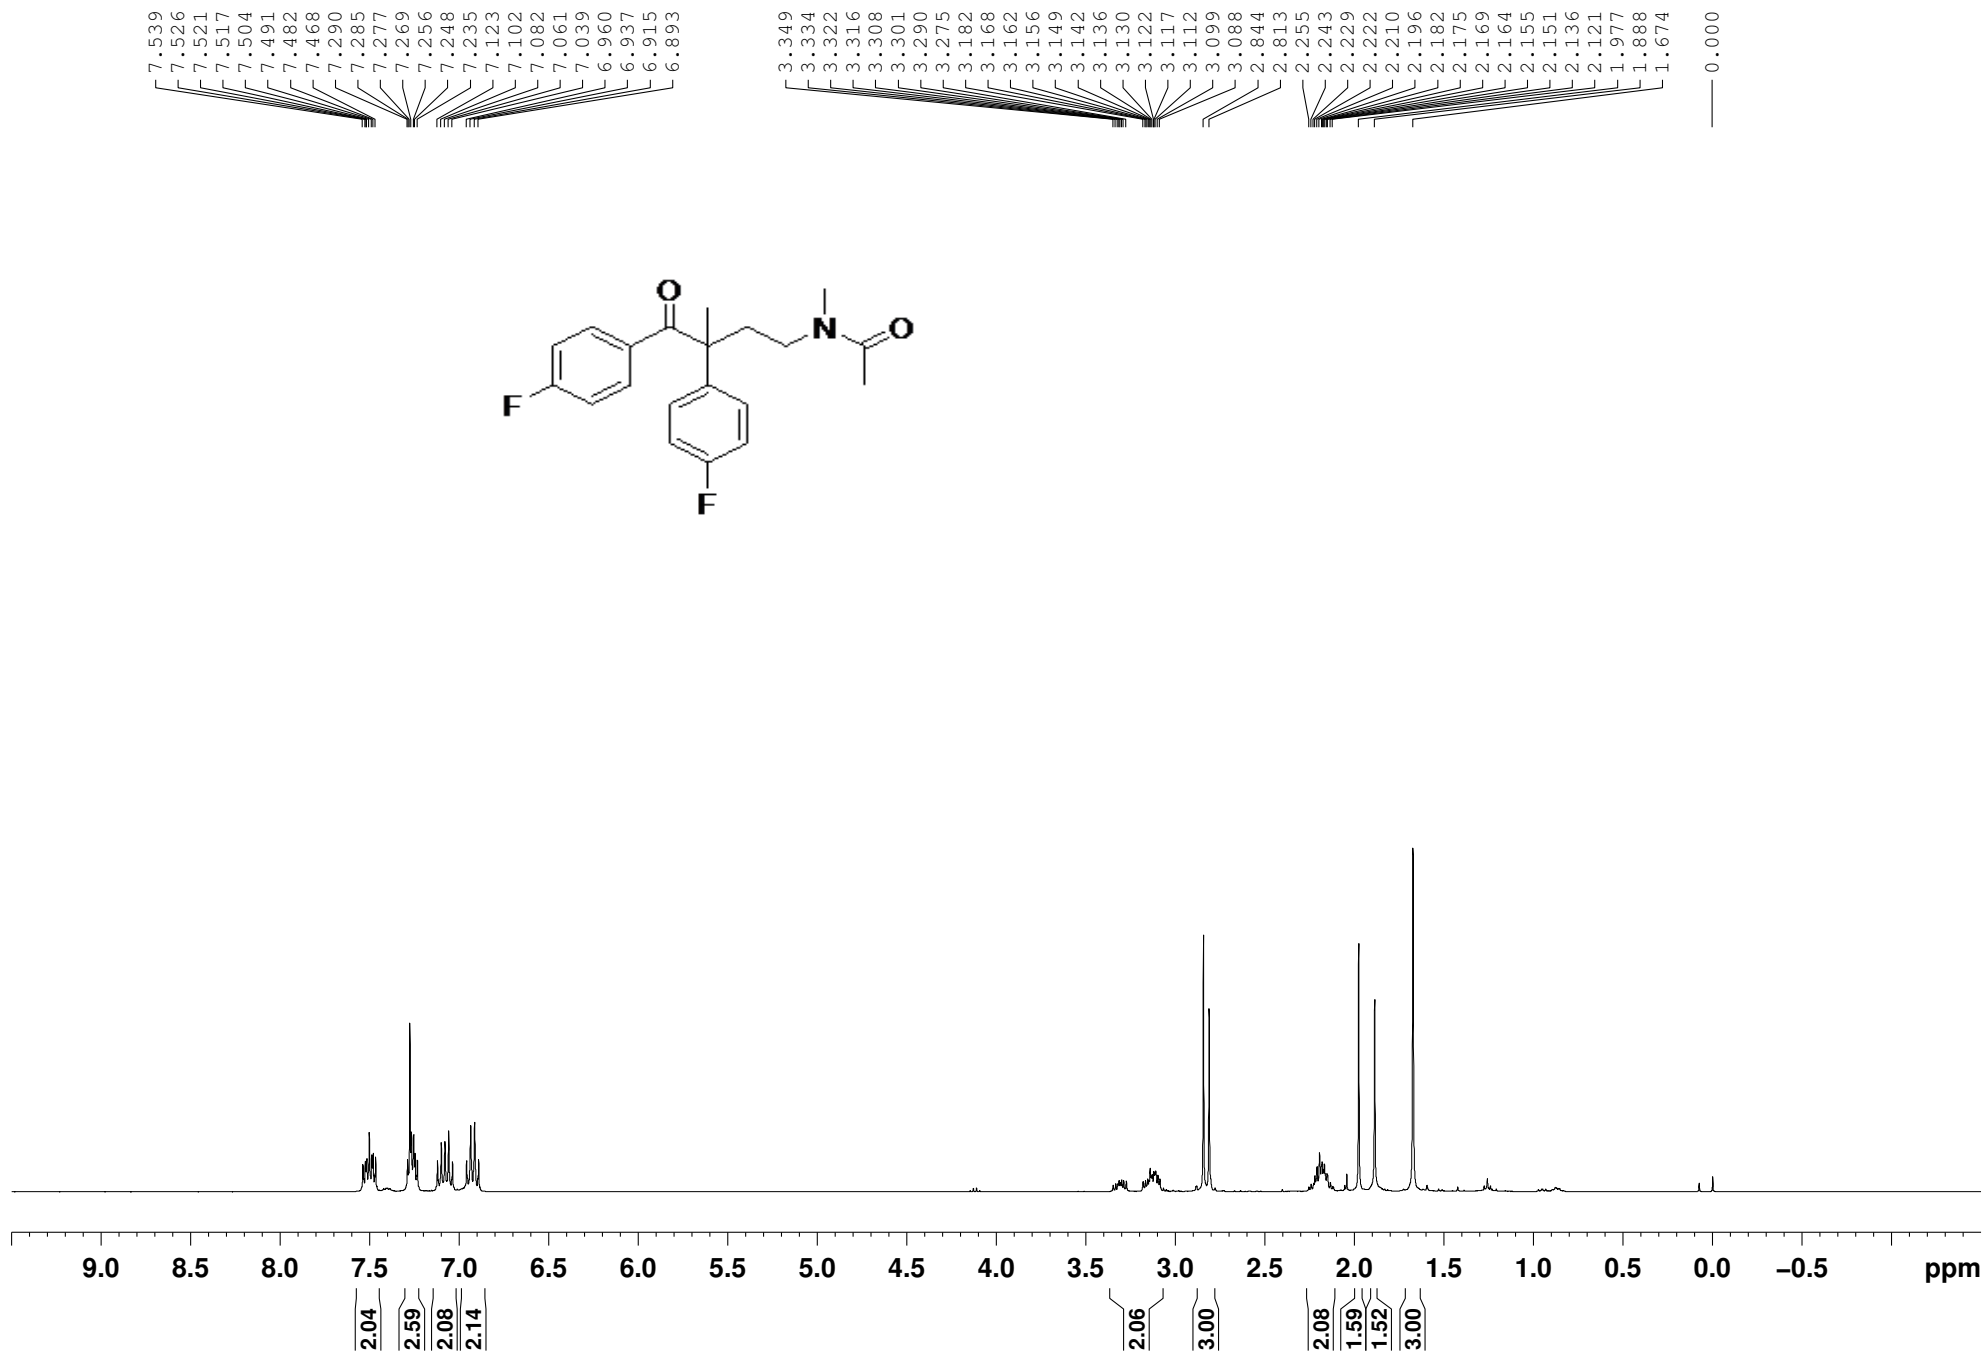

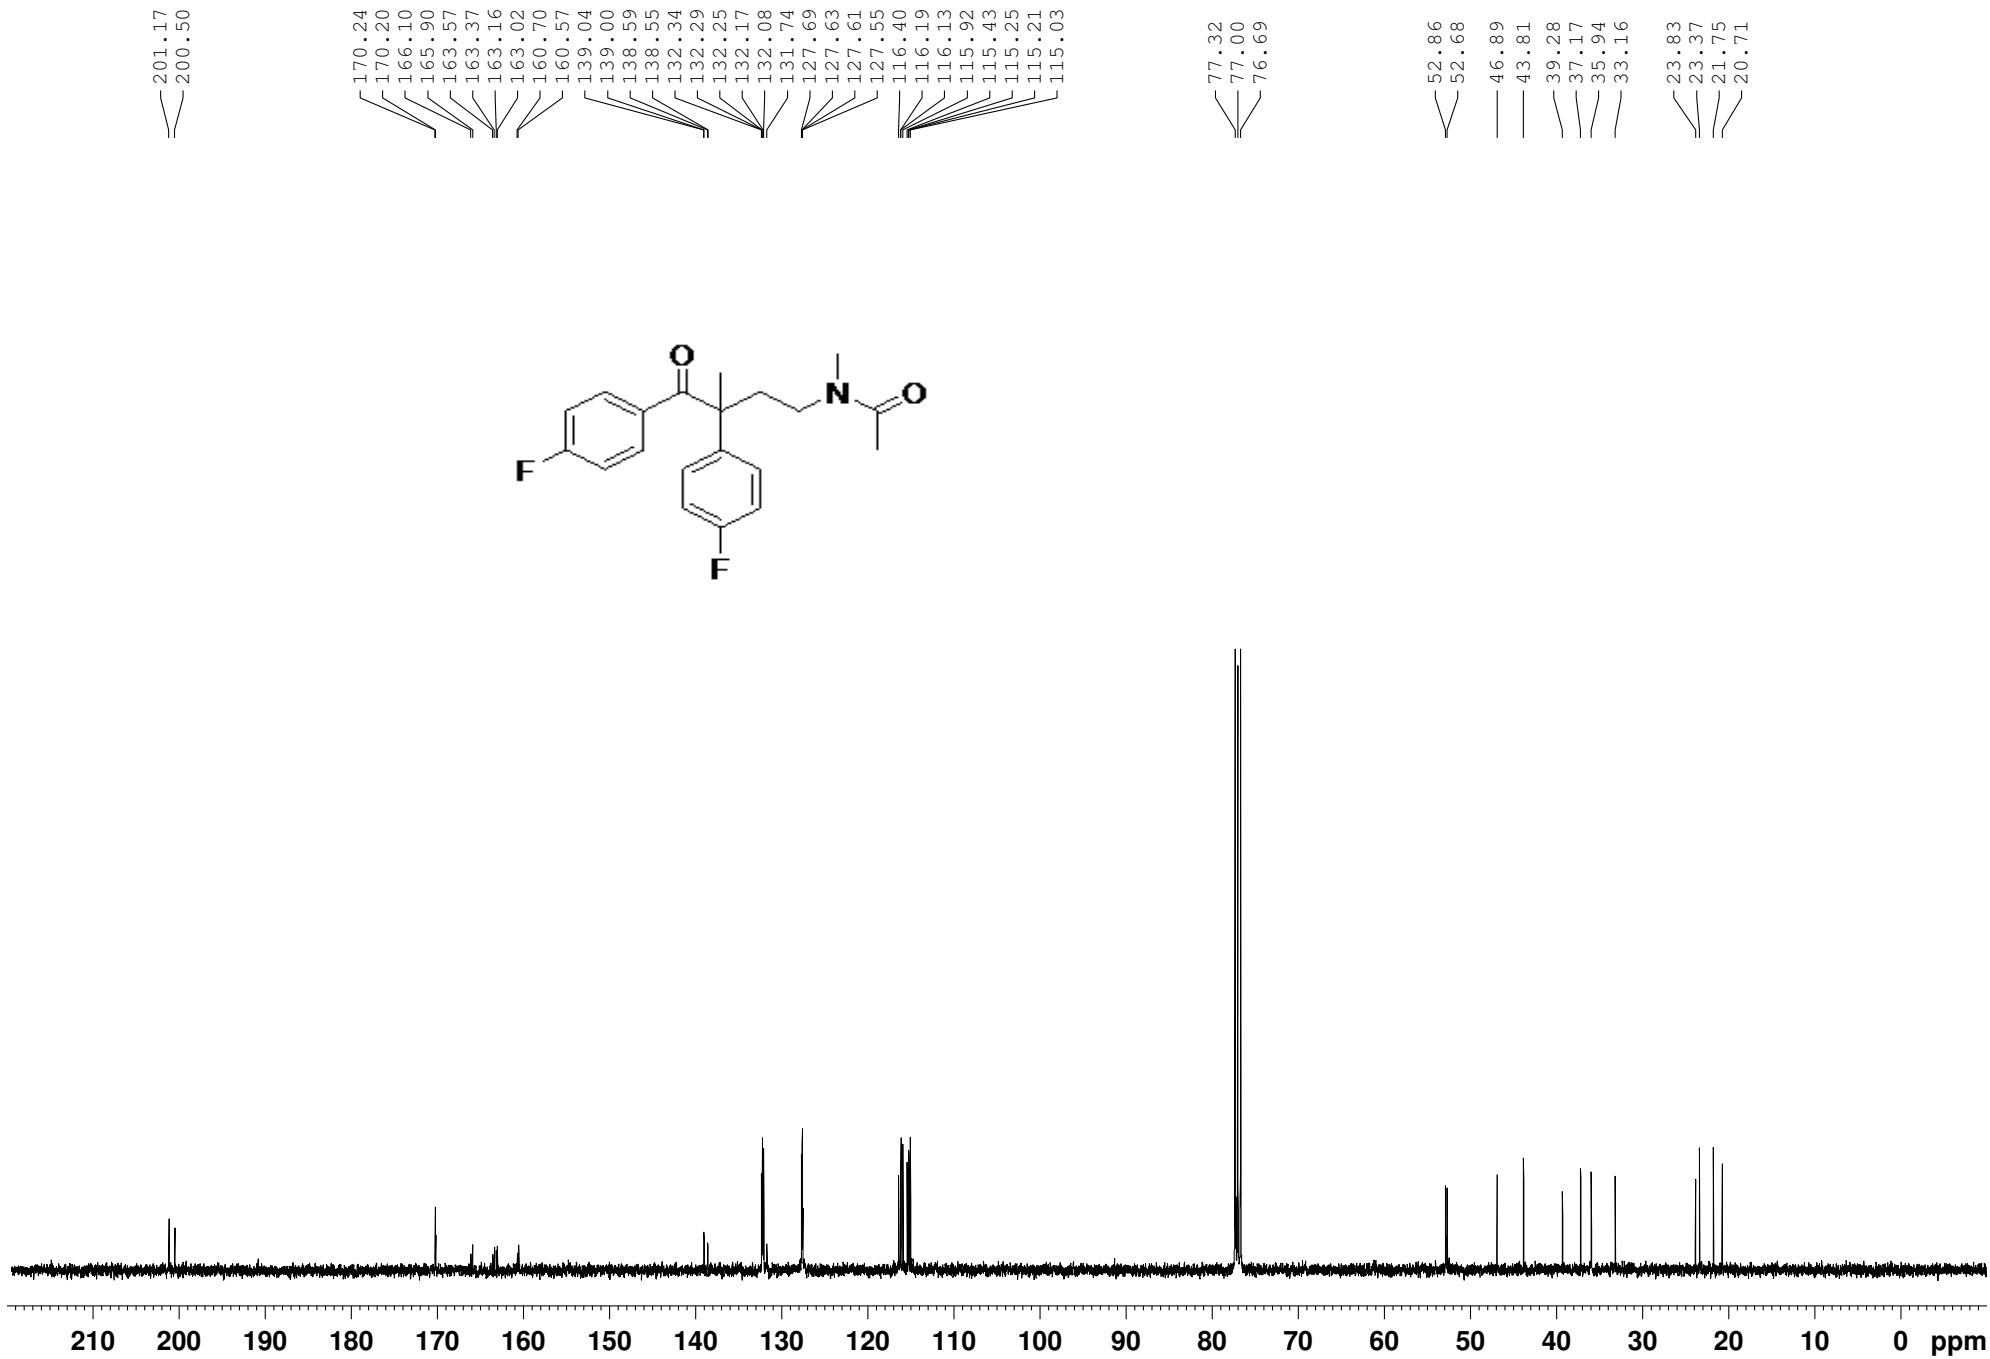

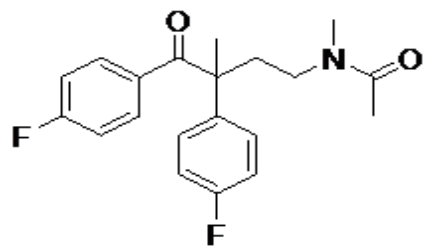

-105.559  
-105.570  
-106.338  
-106.349  
-114.256  
-114.266  
-114.276  
-114.286  
-115.090  
-115.101

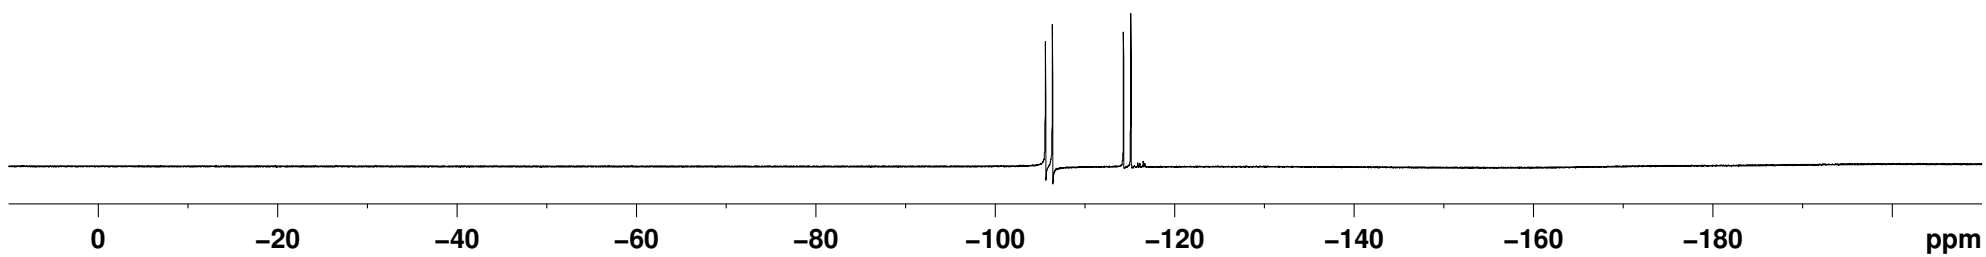



N-(3-Benzoyl-3-phenylhexyl)-N-methylacetamide (3la)

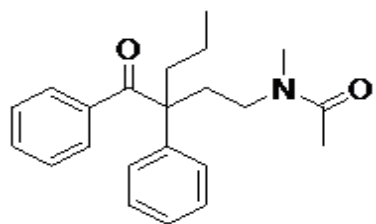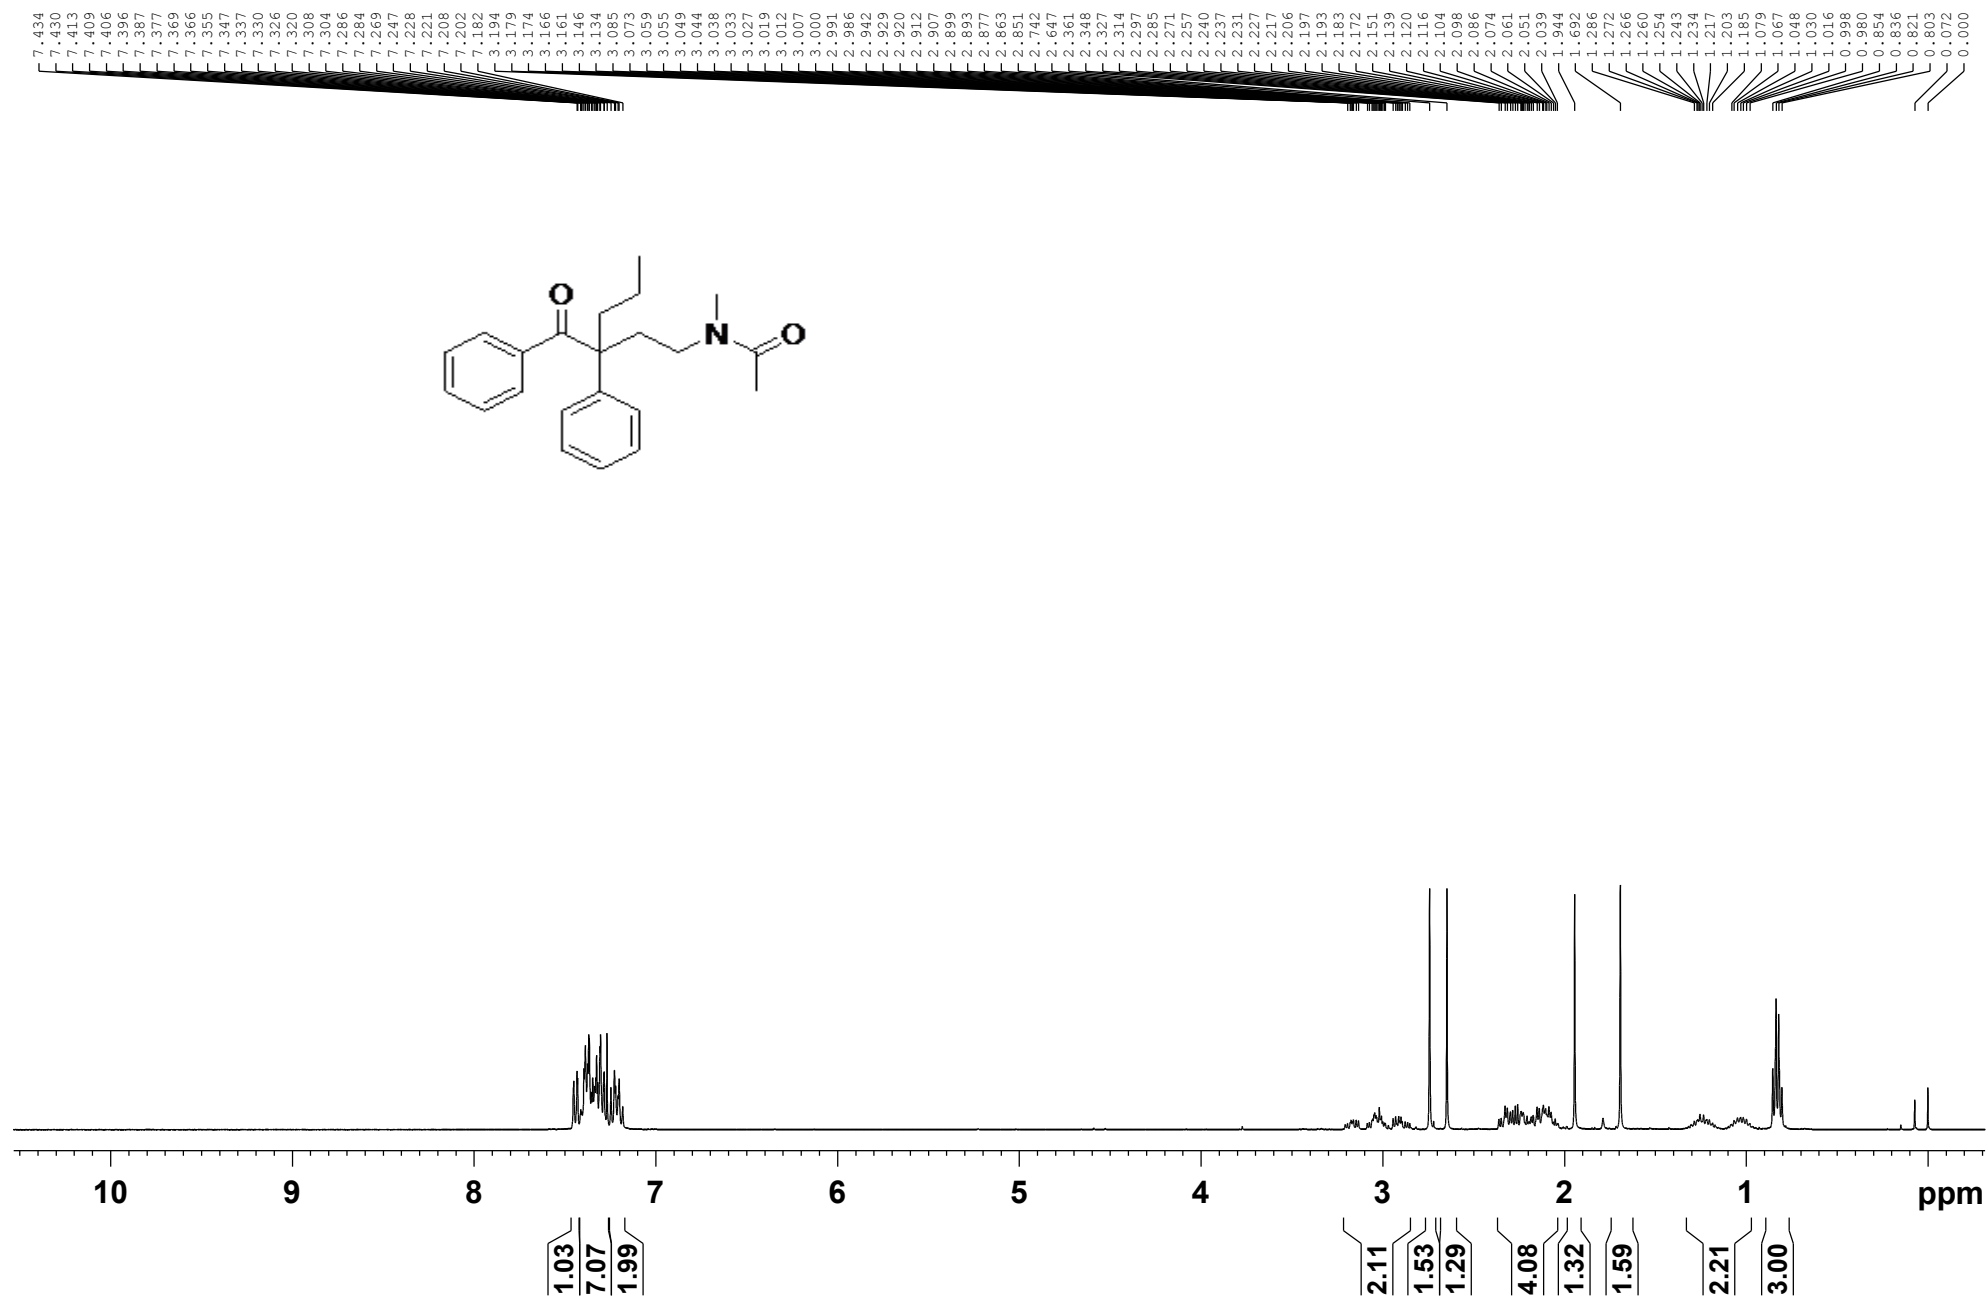

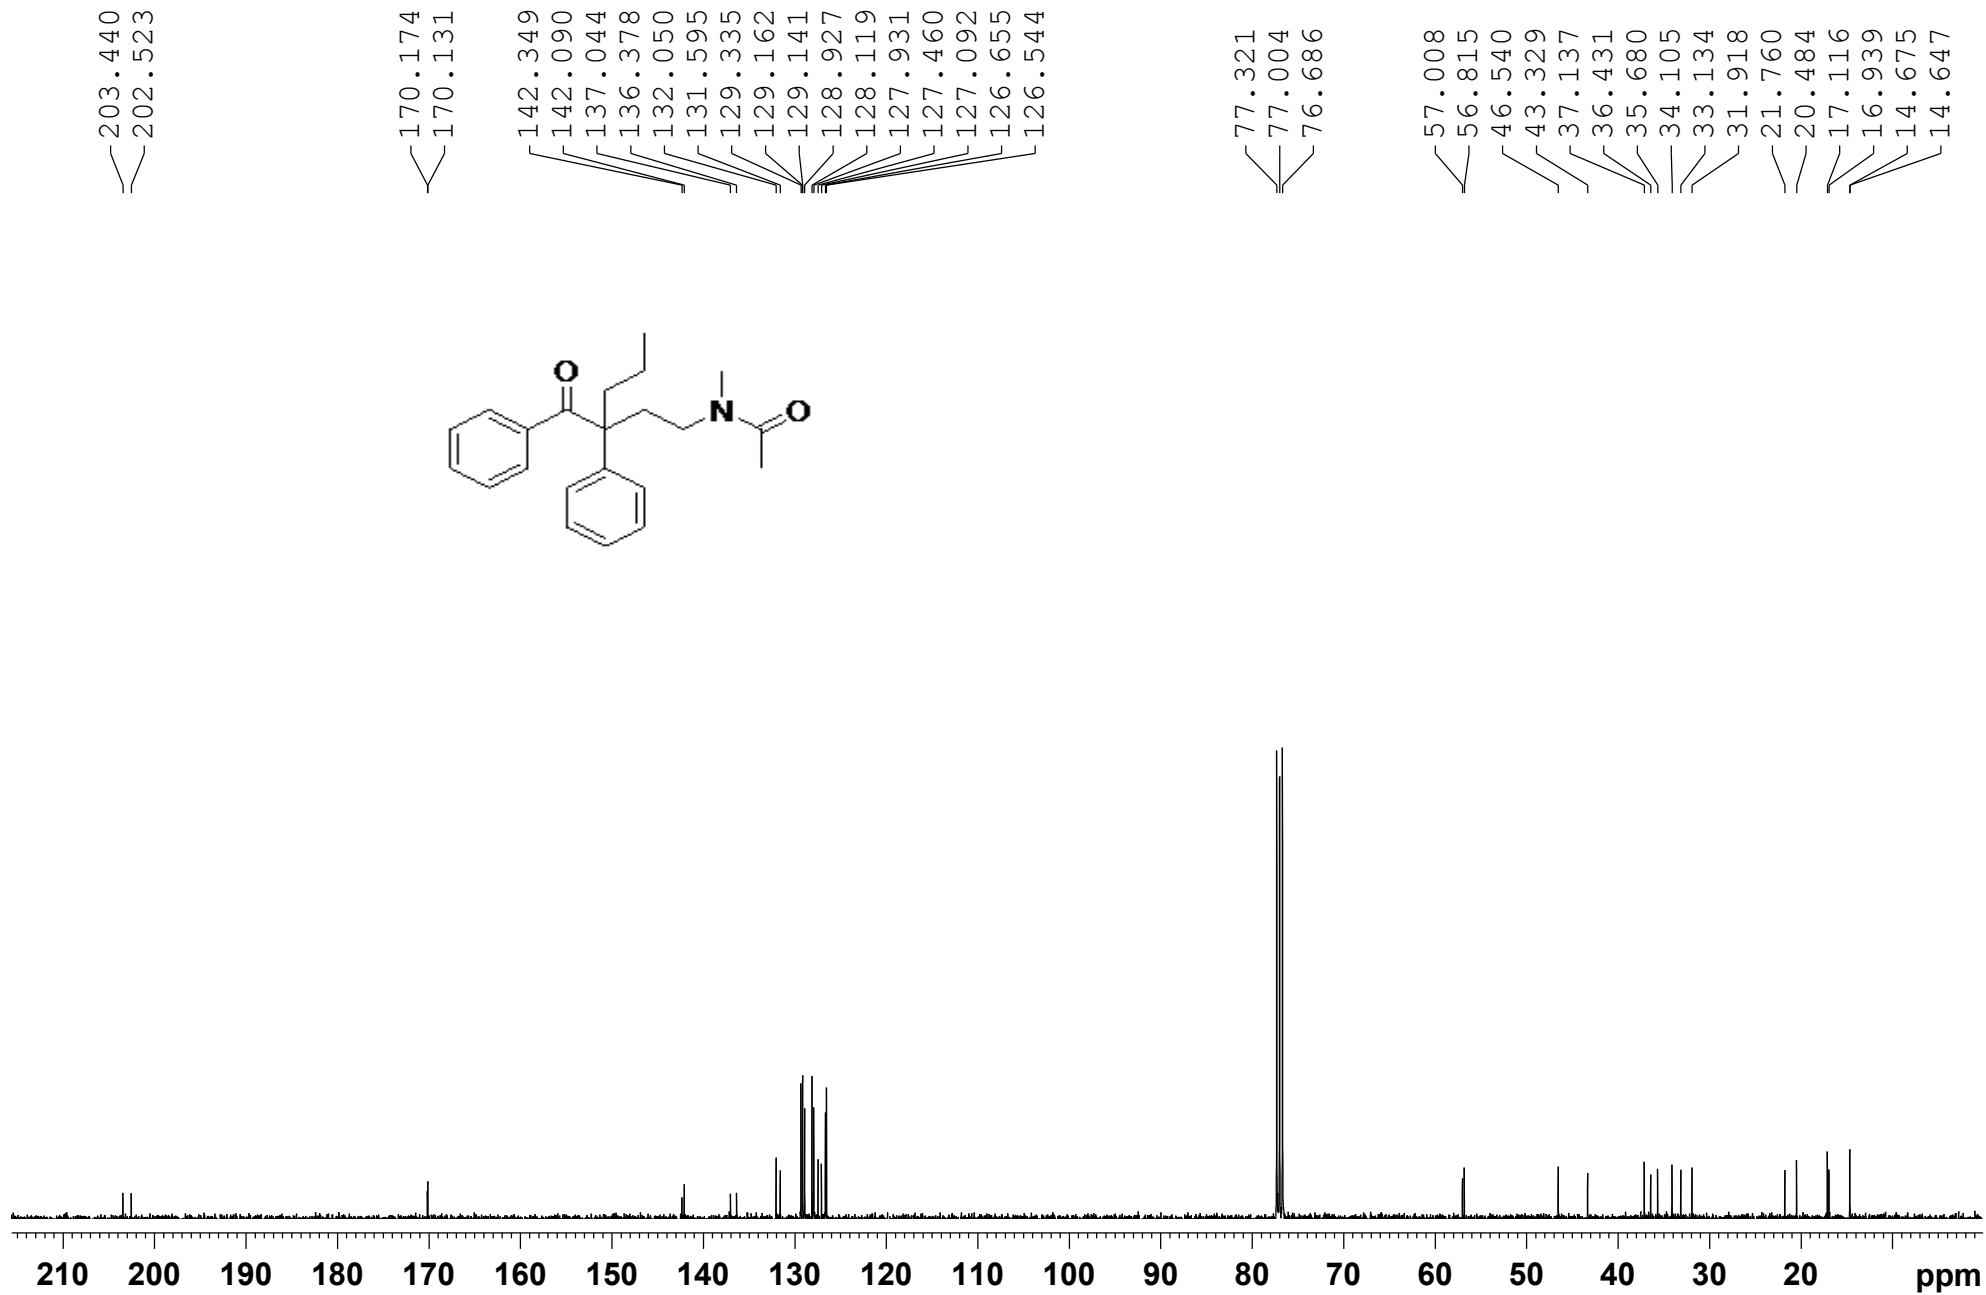

N-Methyl-N-(4-oxo-3-phenyl-4-p-tolylbutyl)acetamide (3ma) and N-Methyl-N-(4-oxo-4-phenyl-3-p-tolylbutyl)acetamide (3ma')

7.952  
7.943  
7.934  
7.931  
7.925  
7.864  
7.851  
7.844  
7.831  
7.483  
7.465  
7.460  
7.441  
7.399  
7.386  
7.380  
7.367  
7.349  
7.316  
7.298  
7.285  
7.279  
7.265  
7.241  
7.232  
7.215  
7.200  
7.190  
7.180  
7.170  
7.161  
7.152  
7.122  
7.102  
7.085  
7.065  
4.653  
4.638  
4.619  
4.508  
4.493  
4.487  
4.472  
3.548  
3.535  
3.531  
3.518  
3.498  
3.306  
3.292  
3.286  
3.272  
3.265  
3.252  
3.240  
3.225  
3.219  
2.904  
2.894  
2.887  
2.535  
2.519  
2.501  
2.485  
2.476  
2.467  
2.454  
2.441  
2.434  
2.345  
2.335  
2.282  
2.261  
2.051  
2.045  
2.040  
2.014  
2.006  
1.999  
1.993  
1.979  
1.972  
1.960  
1.949  
1.903  
1.897  
0.000

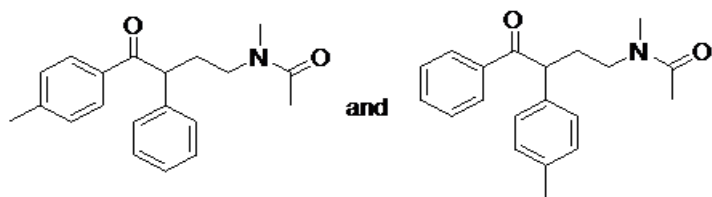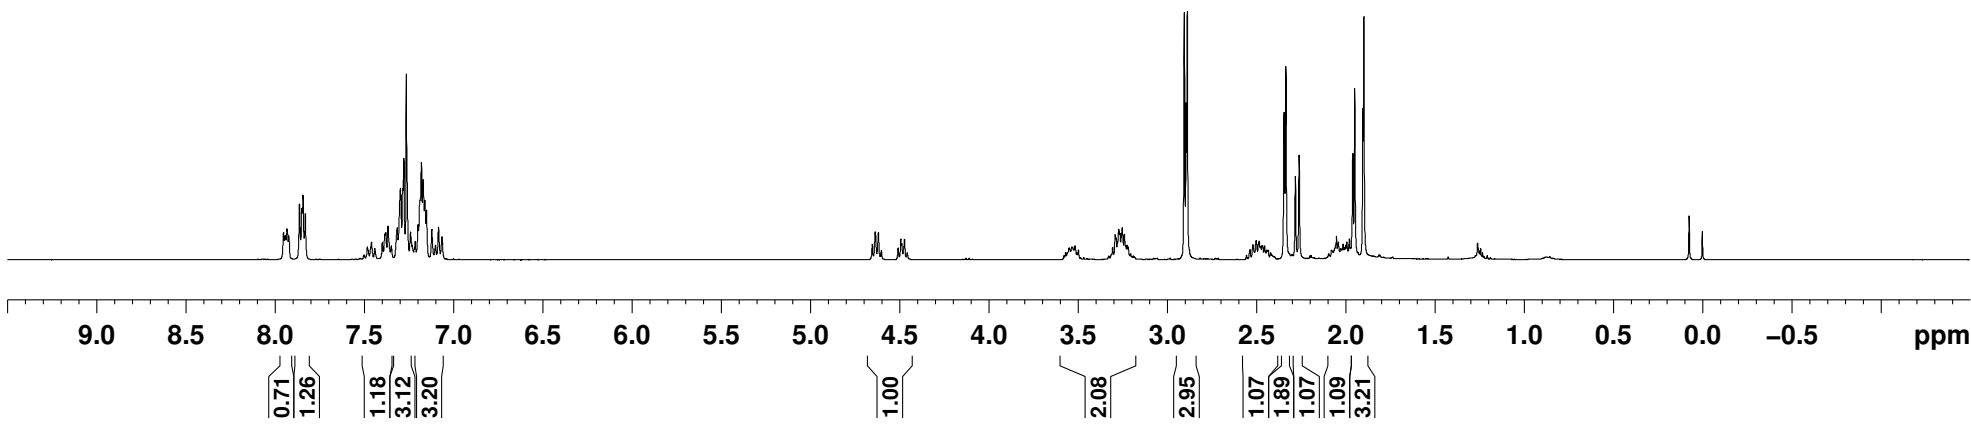

199.30  
198.77  
198.71  
198.17

170.64  
170.54  
144.11  
143.71  
139.49  
138.90  
137.21  
136.70  
136.44  
136.18  
135.56  
133.87  
133.66  
133.11  
132.82  
129.95  
129.64  
129.31  
129.21  
129.18  
128.88  
128.84  
128.82  
128.70  
128.67  
128.58  
128.44  
128.03  
127.92  
127.81  
127.39  
126.98

77.32  
77.00  
76.69

51.02  
50.78  
50.53  
50.33  
48.84  
45.87  
35.83  
33.06  
32.31  
32.27  
31.48  
31.46  
21.64  
21.55  
21.52  
21.00  
20.94

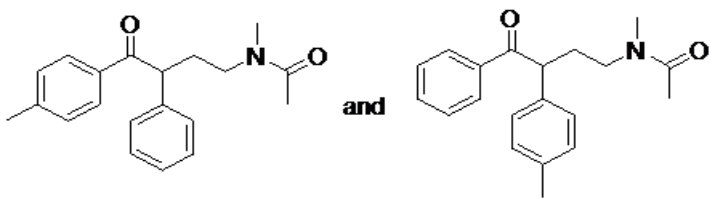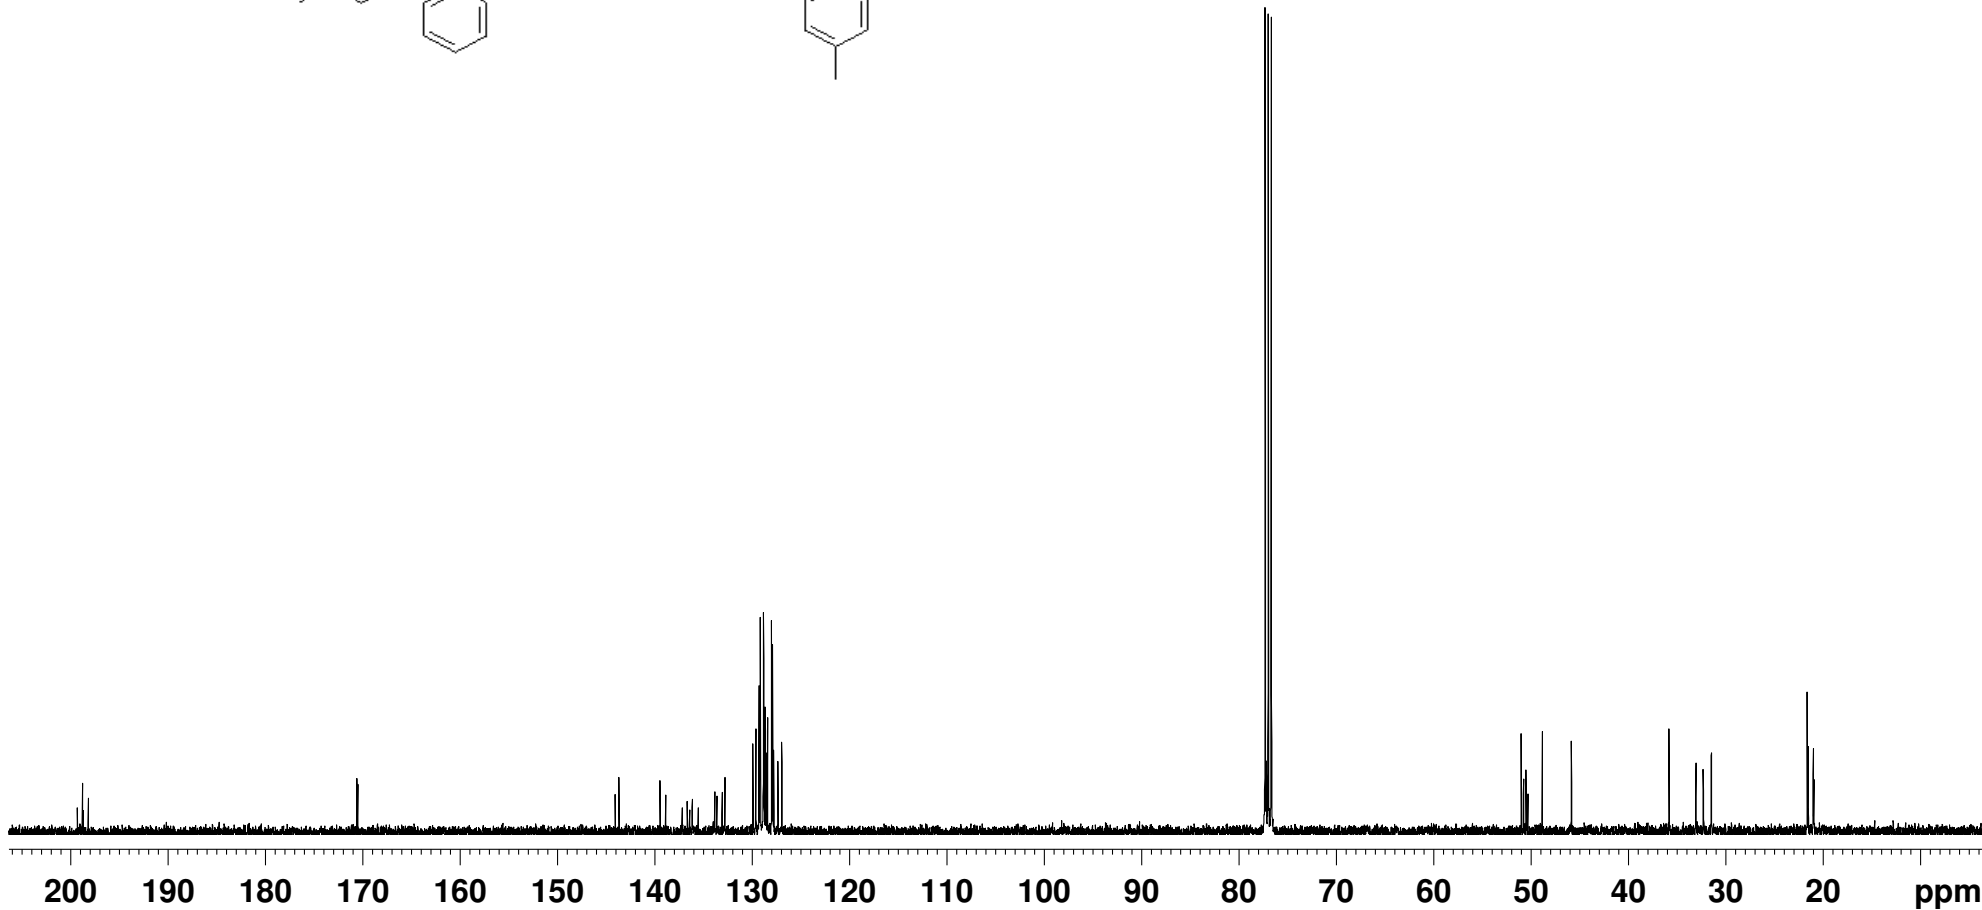

N-Methyl-N-(4-oxo-3-phenyl-4-o-tolylbutyl)acetamide (3na)

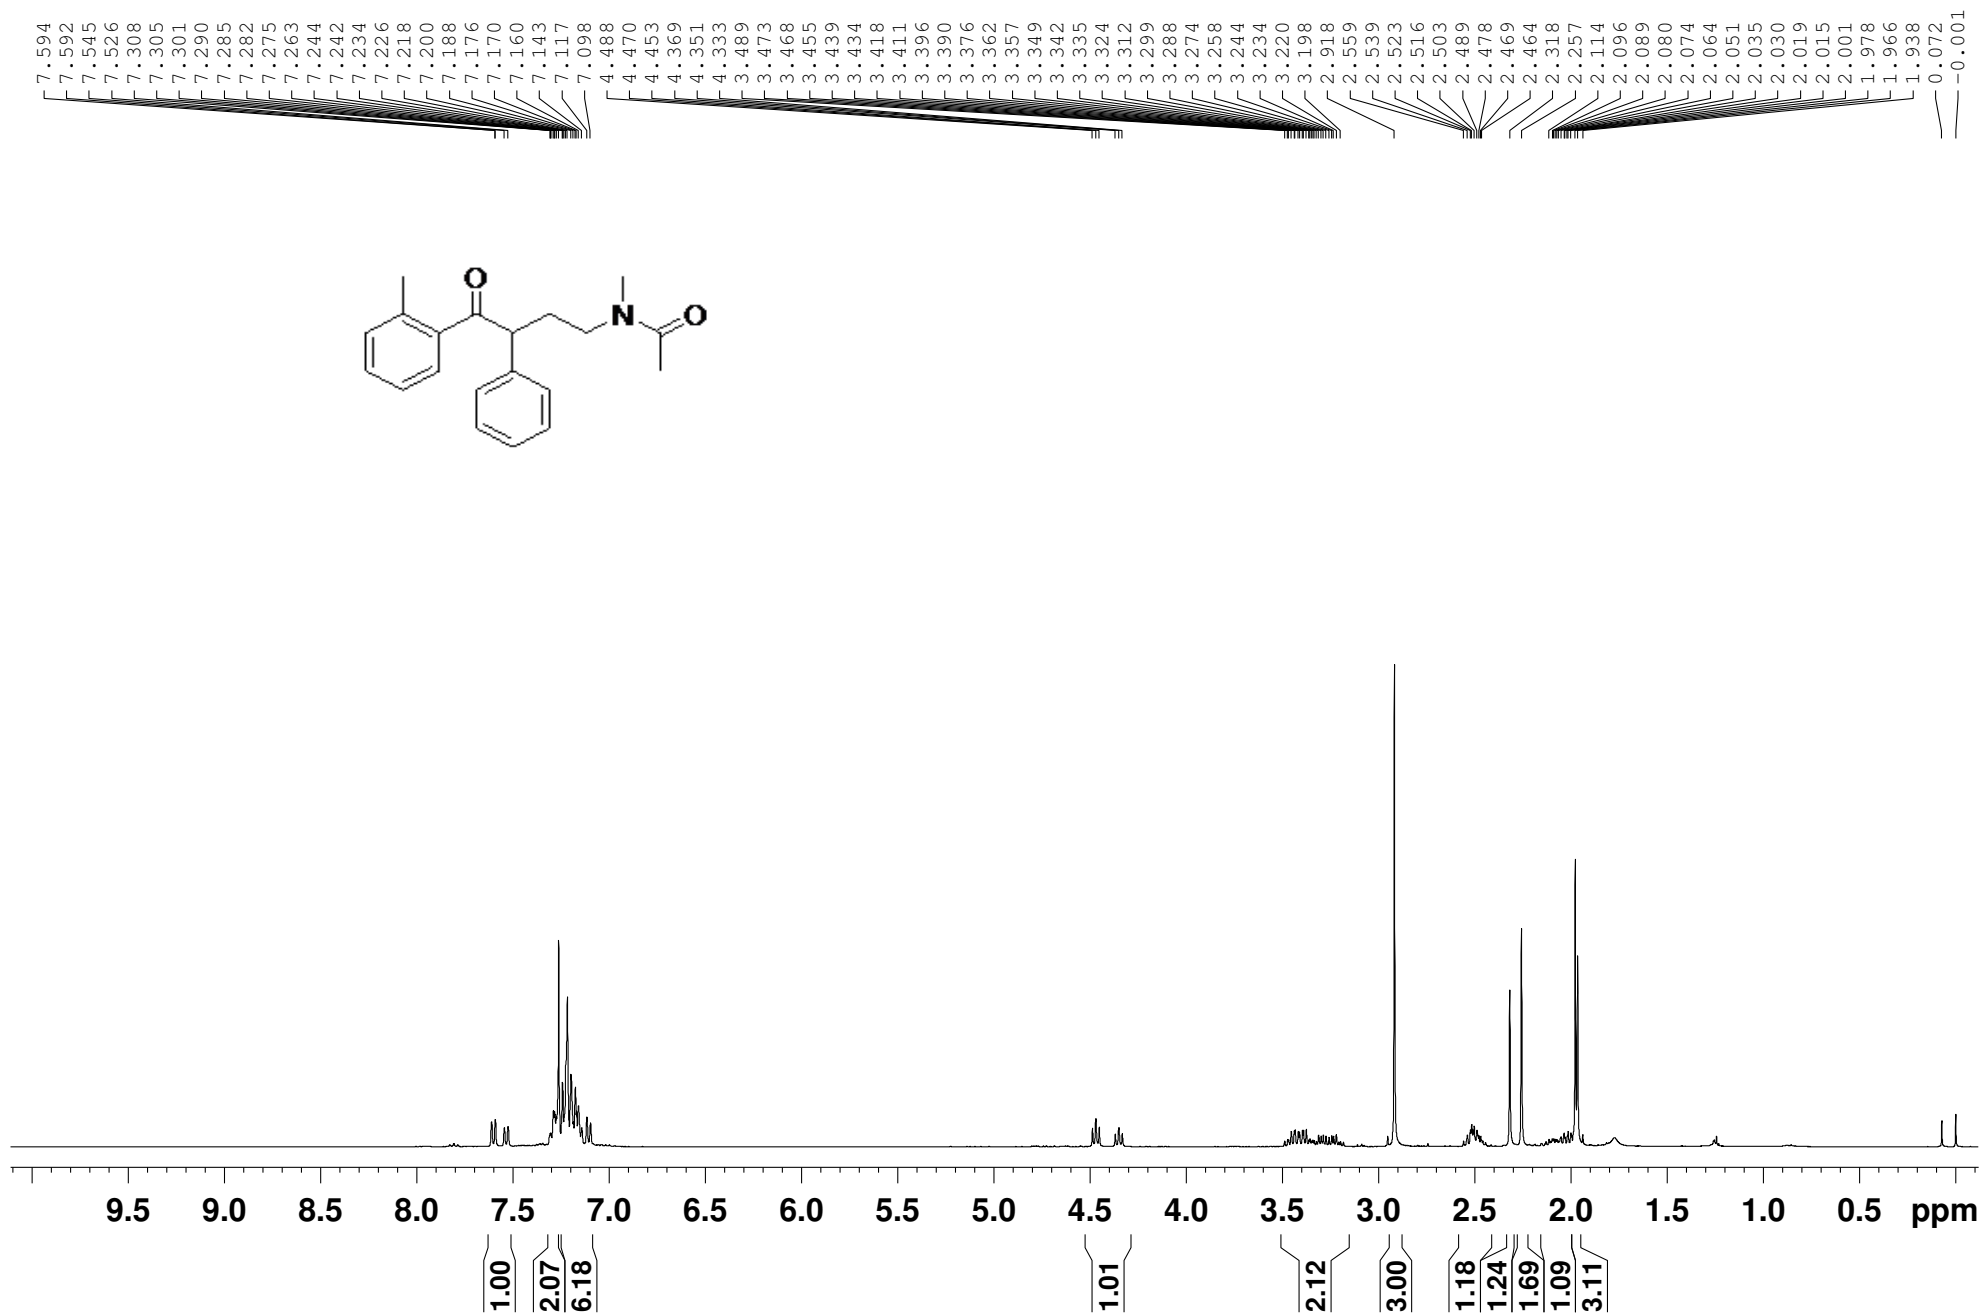

203.14  
202.46

170.64  
170.50  
138.37  
138.33  
138.29  
137.91  
137.84  
137.76  
131.81  
131.47  
131.20  
130.83  
129.11  
128.78  
128.26  
128.13  
127.96  
127.85  
127.53  
127.11  
125.50  
125.46

77.32  
77.00  
76.68

54.43  
53.52  
48.82  
45.89  
35.85  
33.03  
31.50  
30.38  
21.75  
21.04  
20.79  
20.61

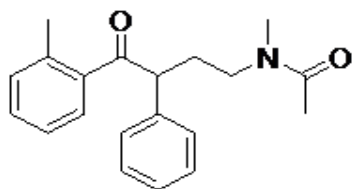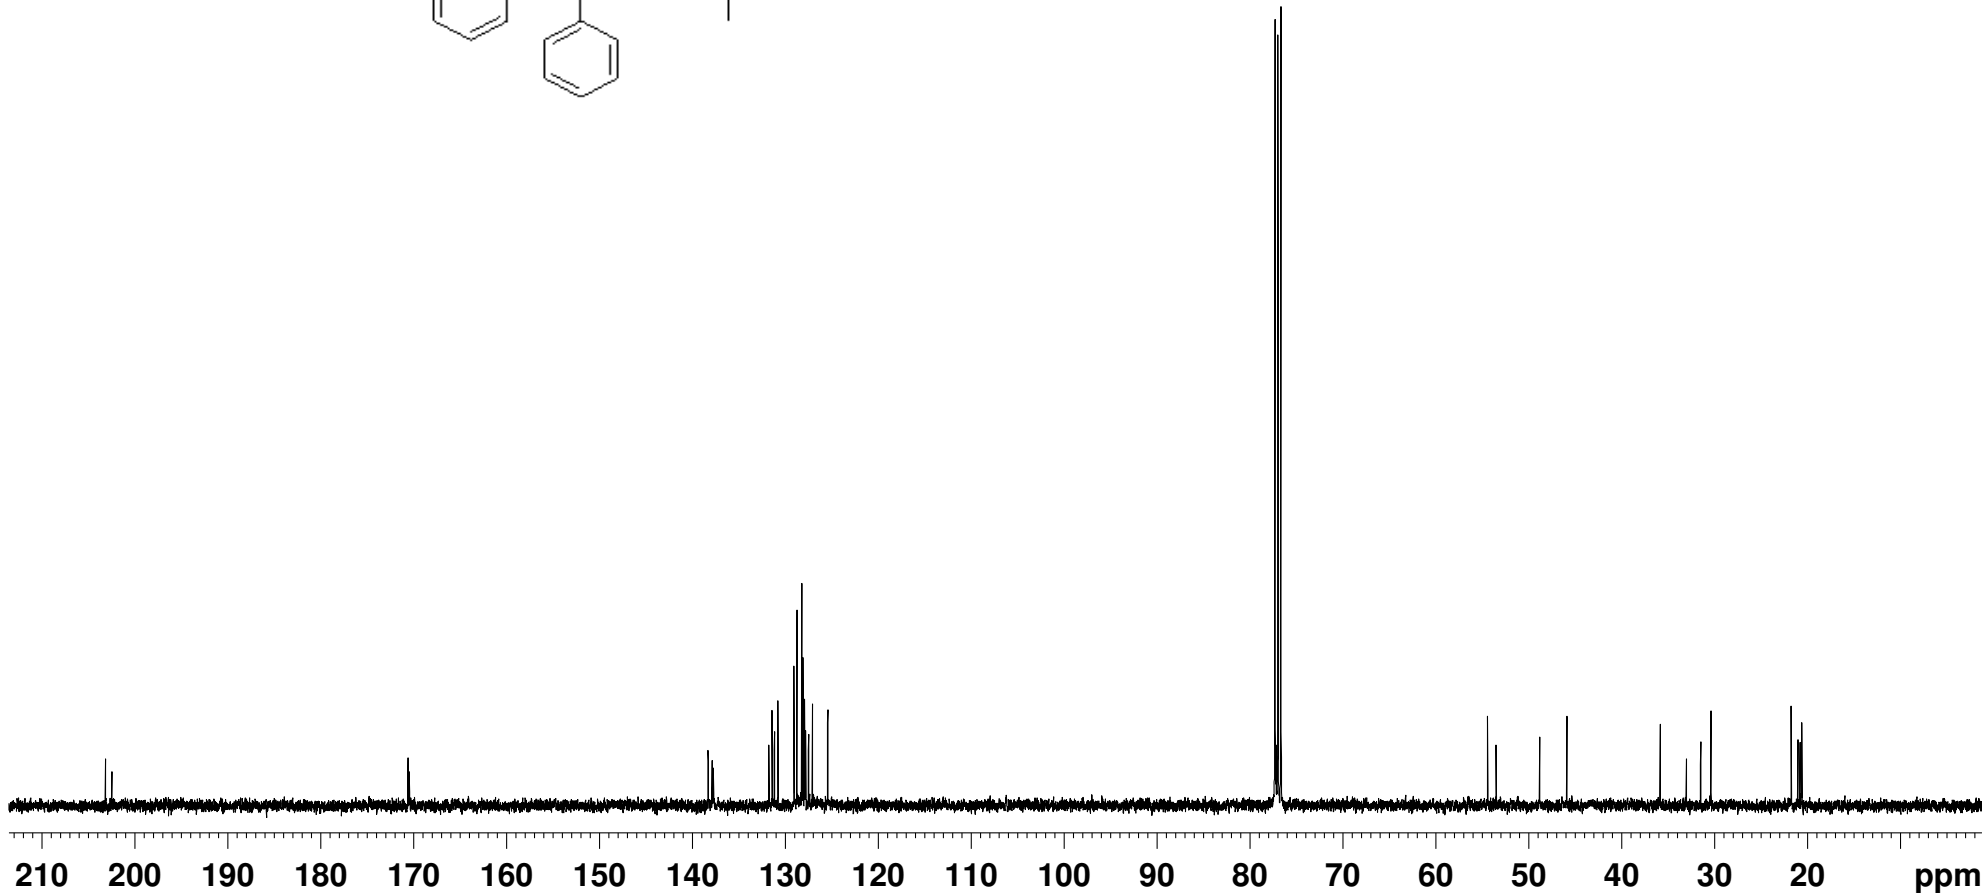

N-(4-(3,4-Dimethylphenyl)-4-oxo-3-phenylbutyl)-N-methylacetamide (3oa) and N-(3-(3,4-Dimethylphenyl)-4-oxo-4-phenylbutyl)-N-methylacetamide (3oa')

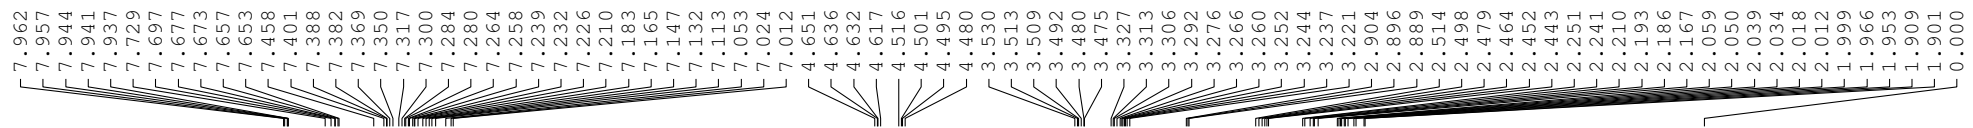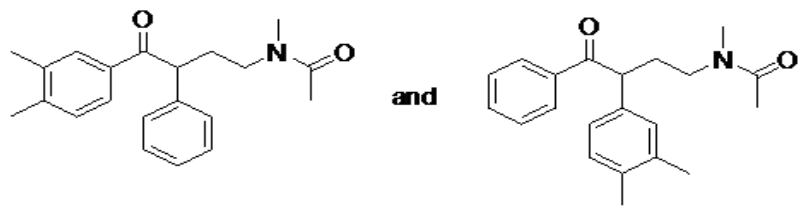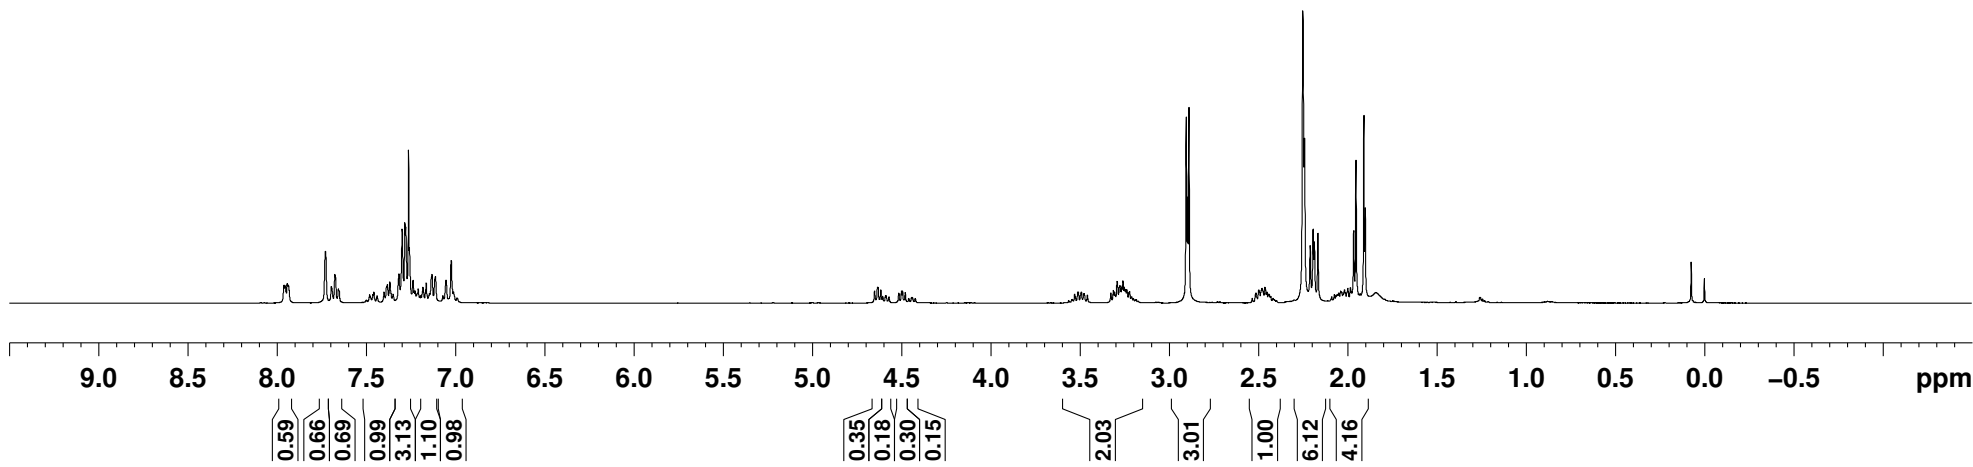

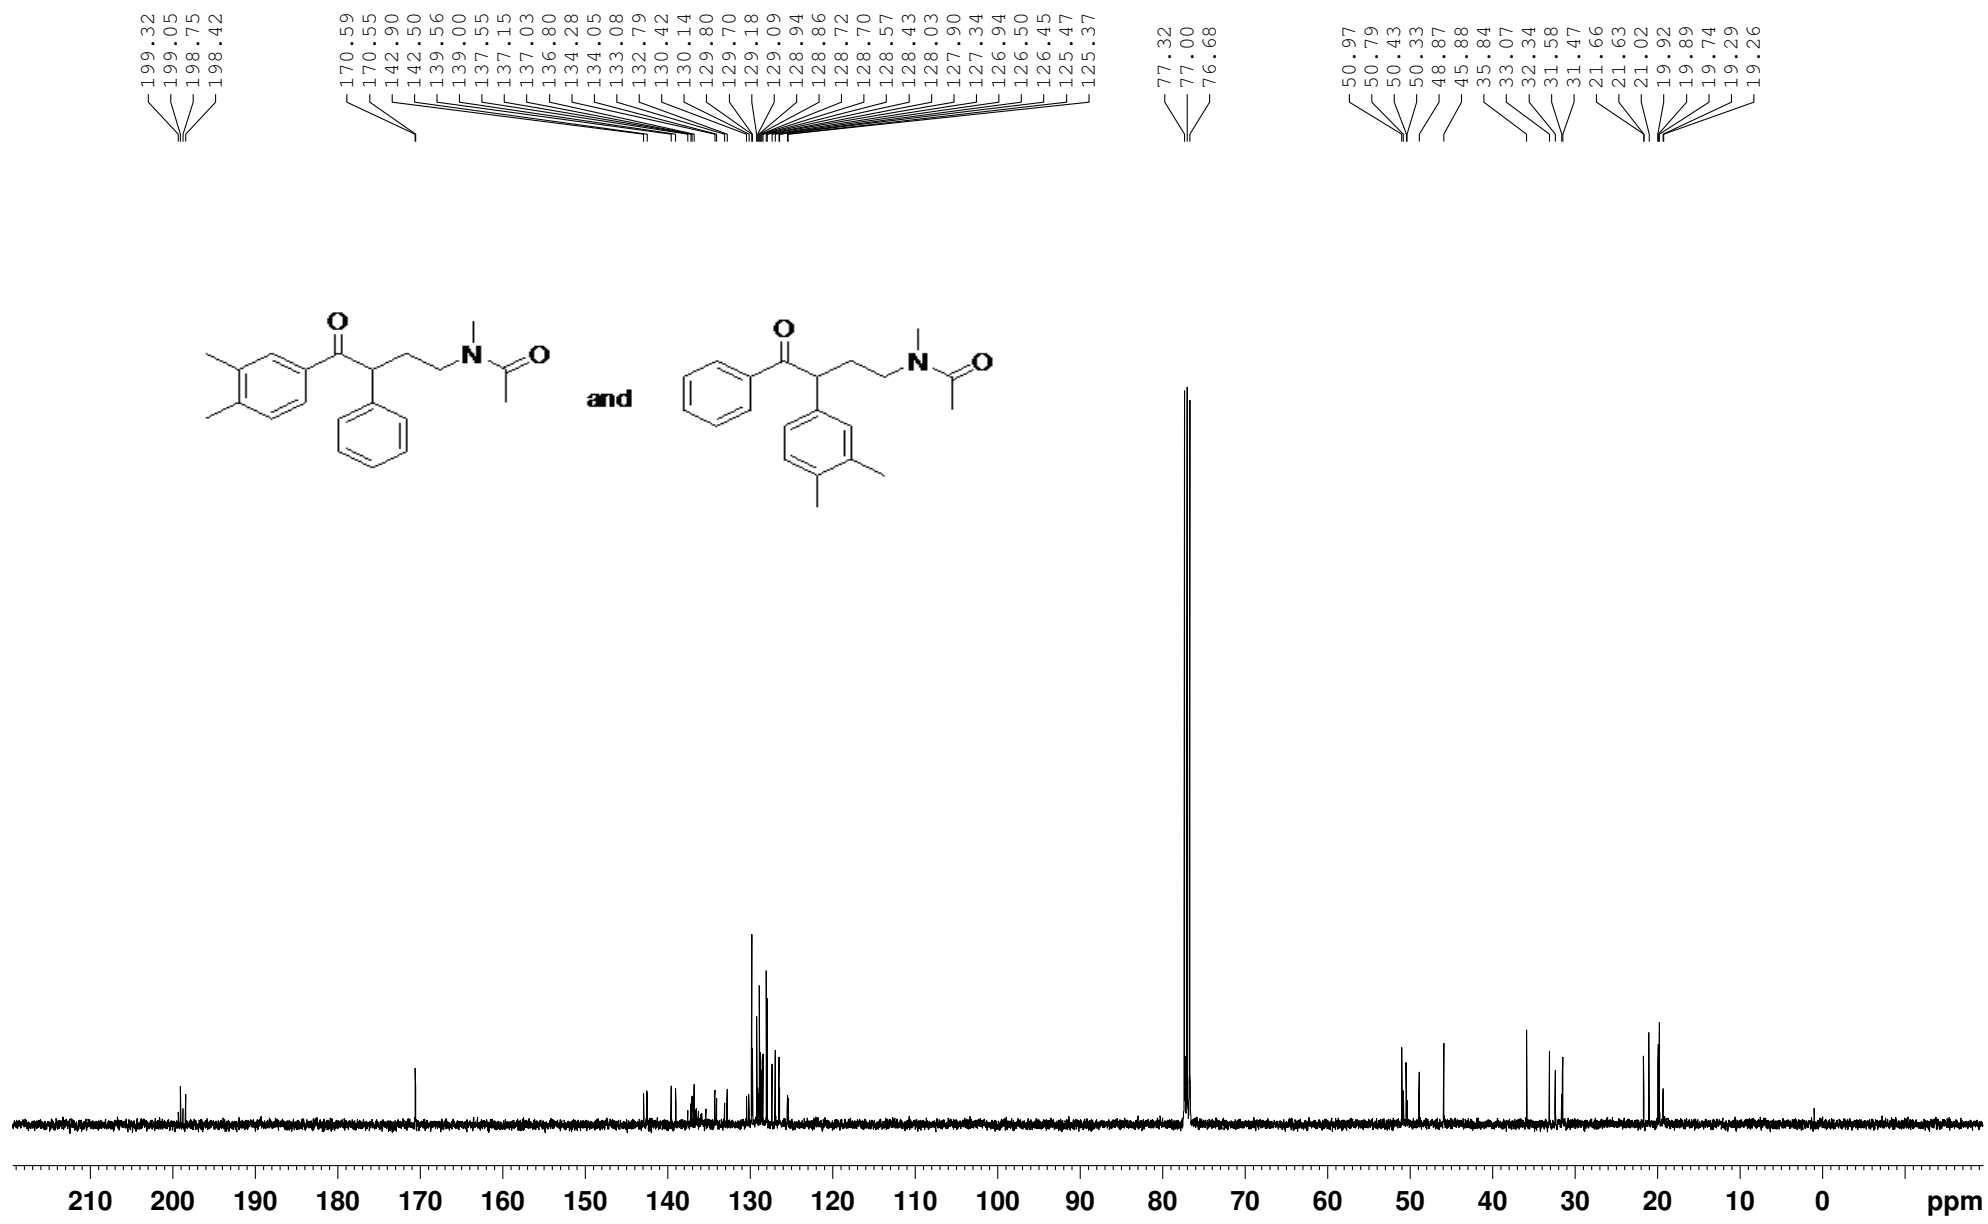



N-(4-(4-Methoxyphenyl)-4-oxo-3-phenylbutyl)-N-methylacetamide (3pa) and N-(3-(4-Methoxyphenyl)-4-oxo-4-phenylbutyl)-N-methylacetamide (3pa')

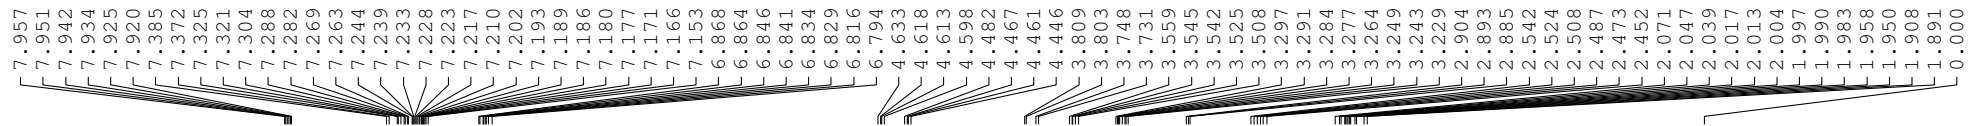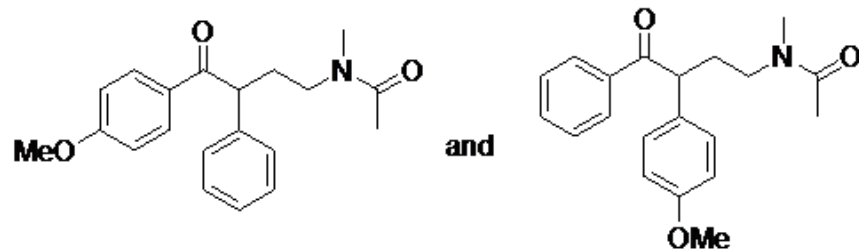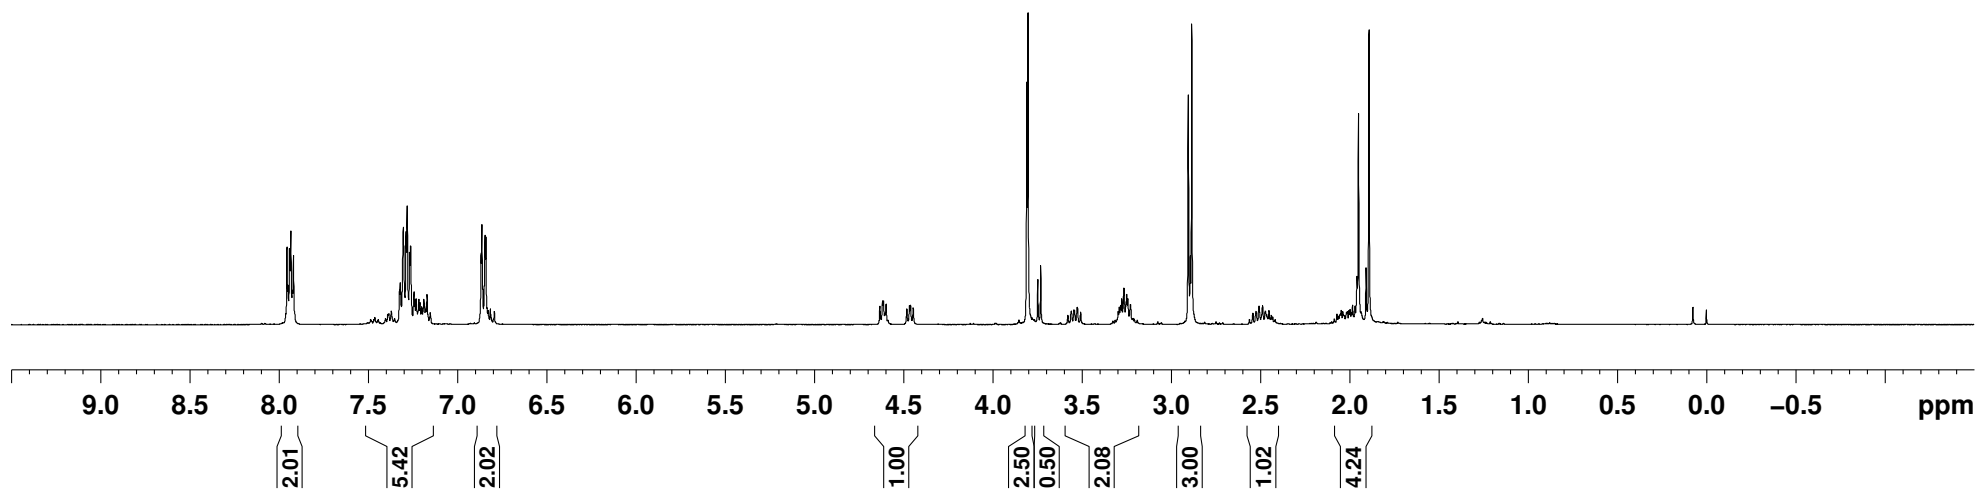

197.63  
197.01

170.62  
170.54  
163.51  
163.31

139.70  
139.14  
131.00  
129.35  
129.18  
129.11  
129.00  
128.86  
128.66  
128.58  
128.44  
127.96  
127.84  
127.34  
126.93  
114.65  
114.34  
113.79  
113.65

77.32  
77.00  
76.69

55.39  
55.34  
55.13  
50.77  
50.30  
48.86  
45.86

35.81  
33.04  
32.36  
31.54

21.63  
21.00

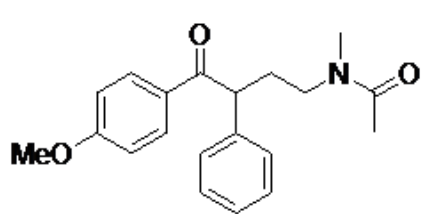

and

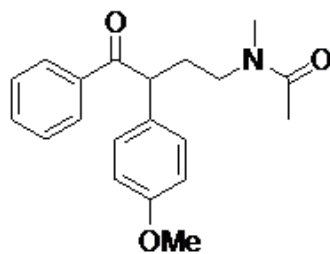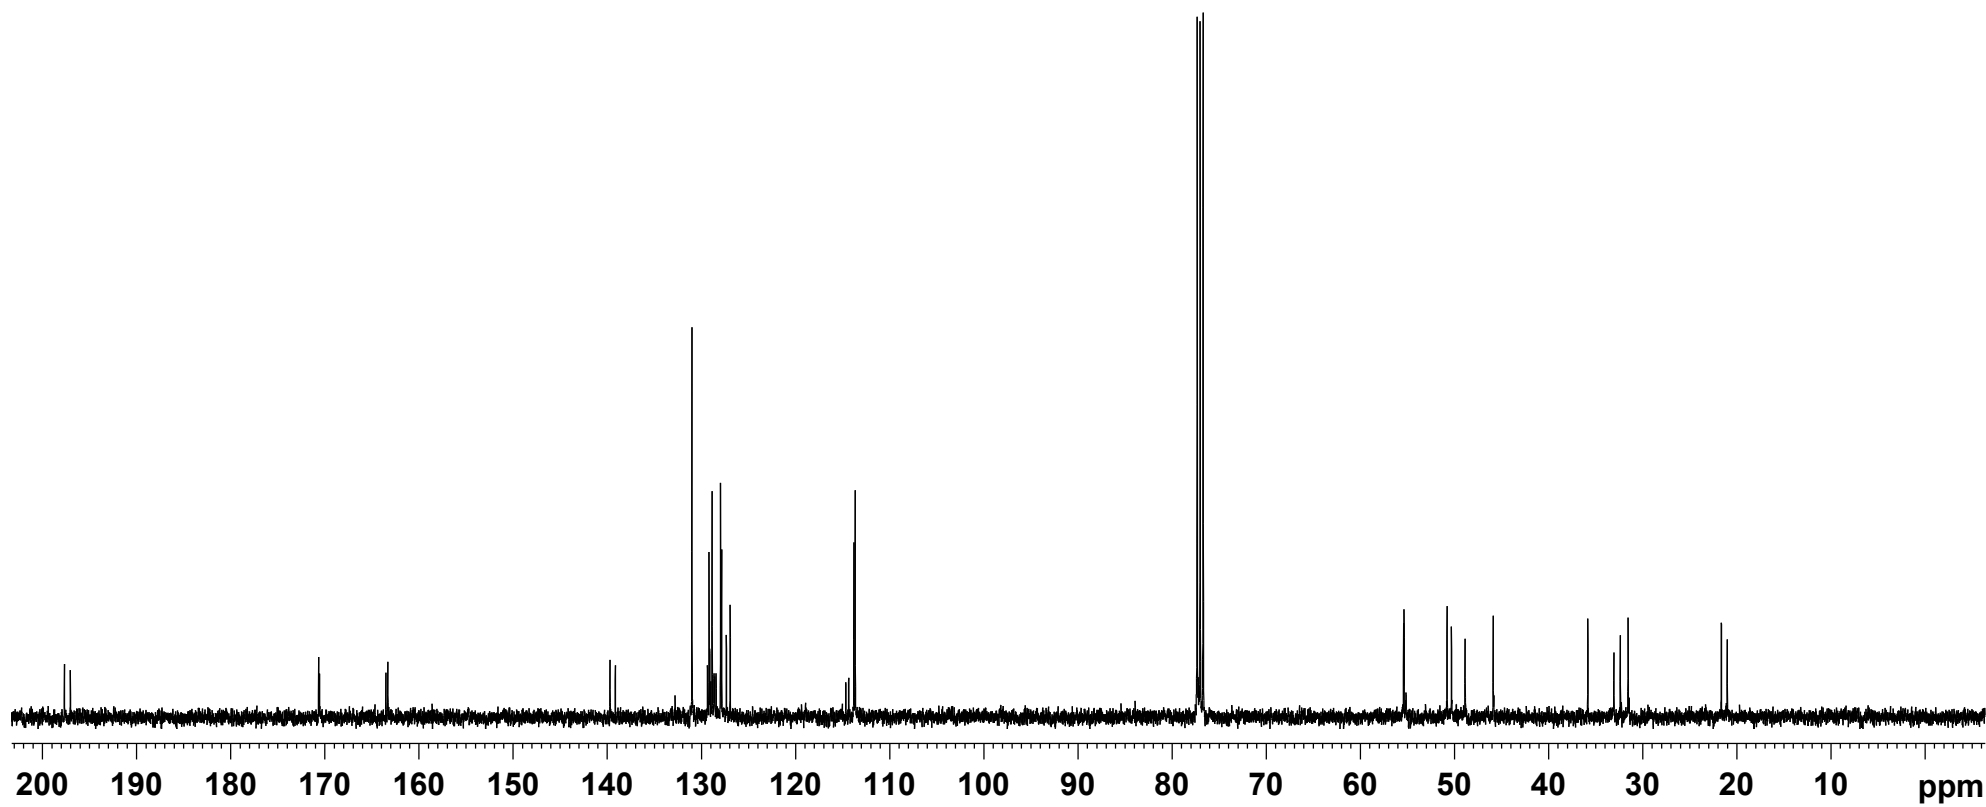

N-(4-(4-Methoxyphenyl)-3-methyl-4-oxo-3-phenylbutyl)-N-methylacetamide (3qa) and N-(3-(4-Methoxyphenyl)-3-methyl-4-oxo-4-phenylbutyl)-N-methylacetamide (3qa')

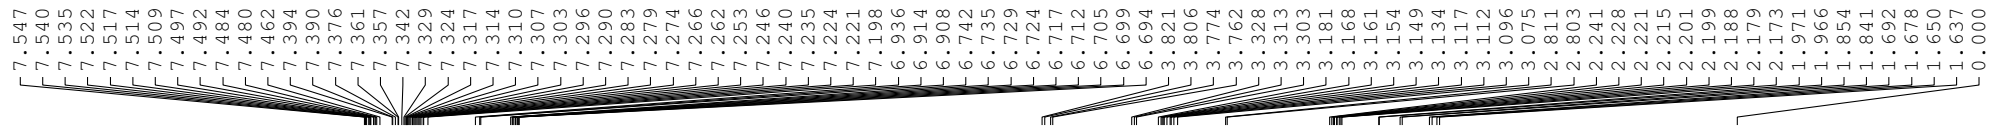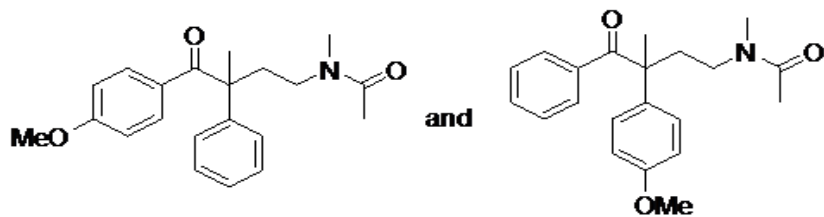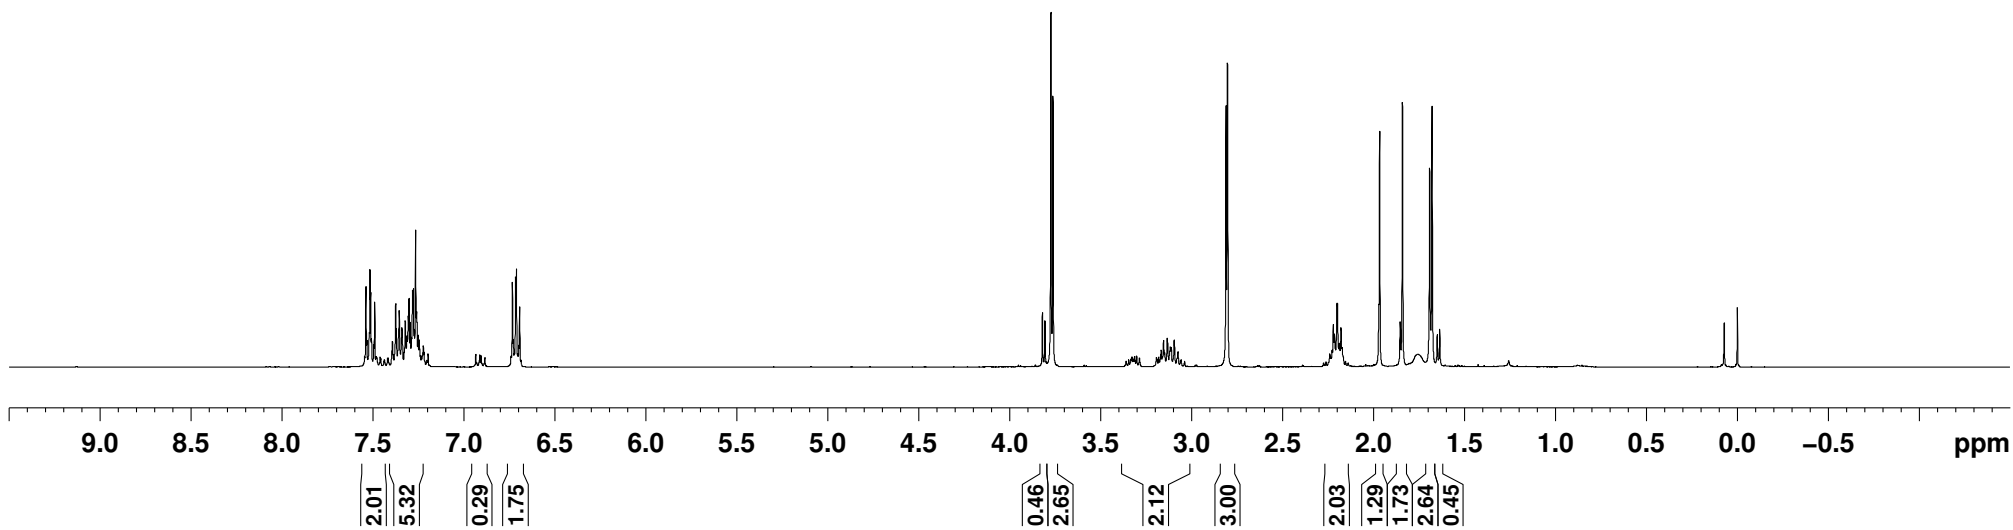

201.42  
200.82

170.33  
170.18  
162.58  
162.30  
144.01  
143.51  
132.16  
132.02  
129.54  
129.14  
128.96  
128.73  
128.20  
128.12  
127.97  
127.25  
127.19  
127.11  
126.89  
126.02  
125.99  
114.59  
114.40  
113.29  
113.16

77.32  
77.00  
76.68

55.32  
55.26  
53.24  
53.09  
47.05  
43.92  
39.31  
37.32  
35.90  
33.17  
24.18  
23.58  
21.78  
20.69

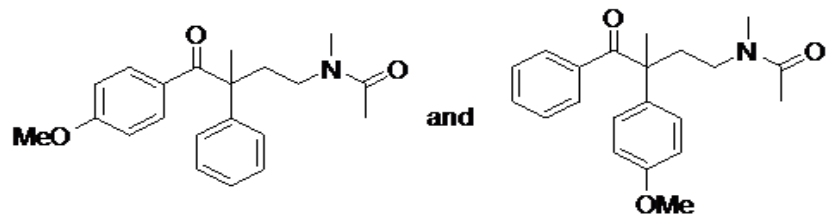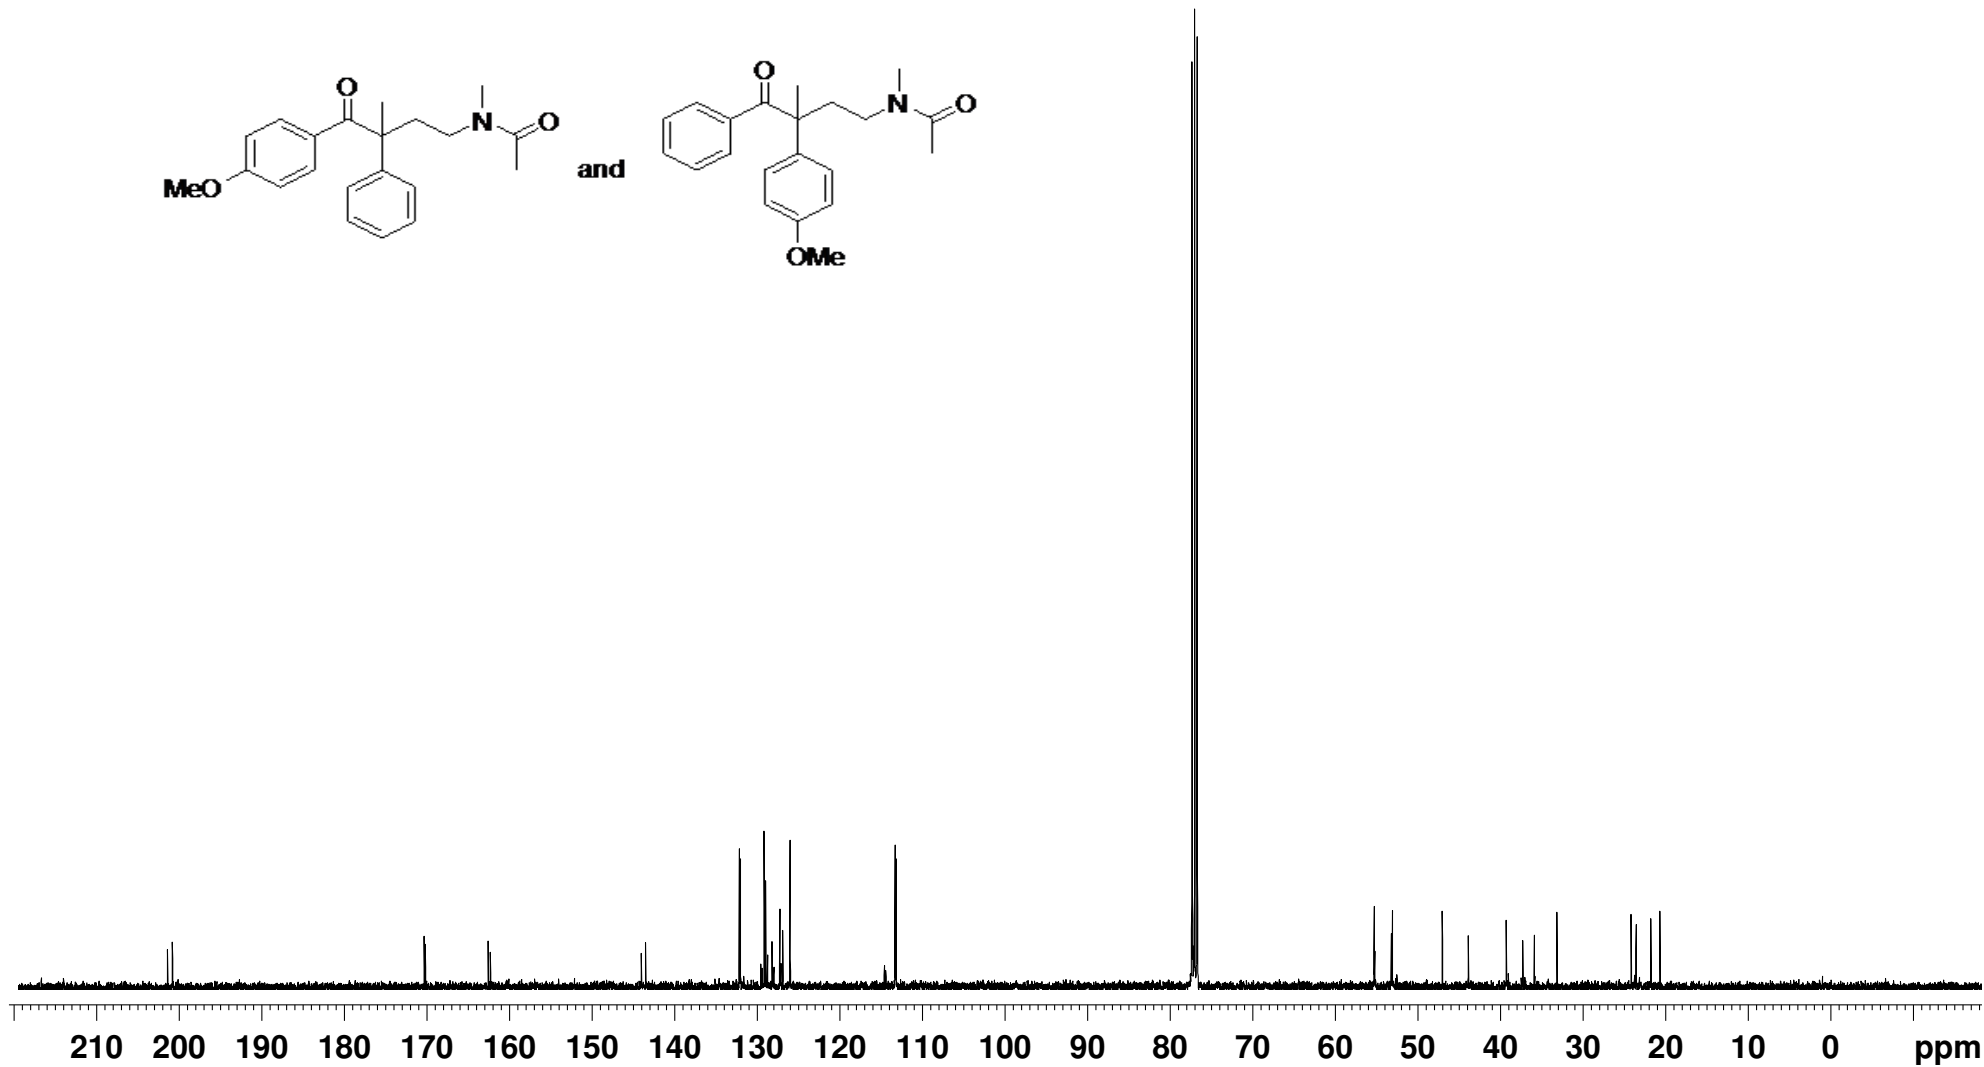

N-(3-(4-Fluorophenyl)-4-oxo-4-phenylbutyl)-N-methylacetamide (3ra) and N-(4-(4-Fluorophenyl)-4-oxo-3-phenylbutyl)-N-methylacetamide (3ra)

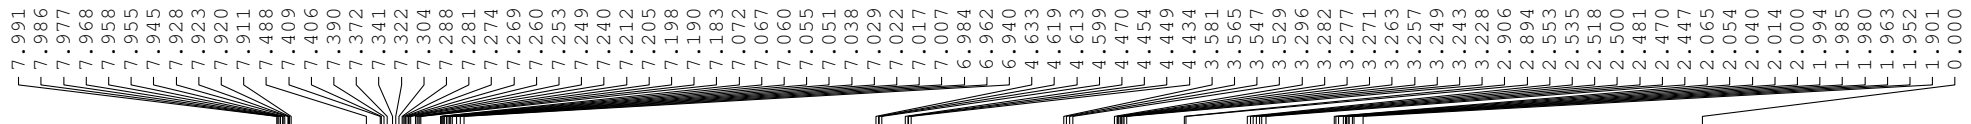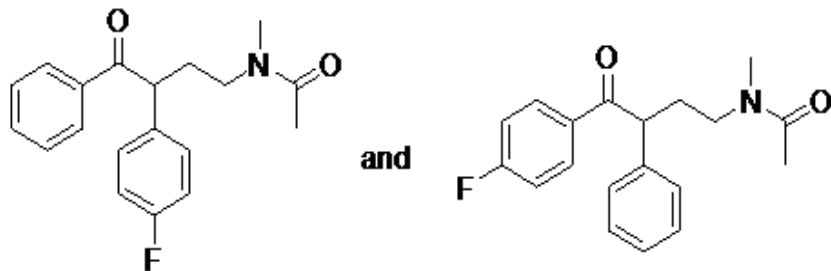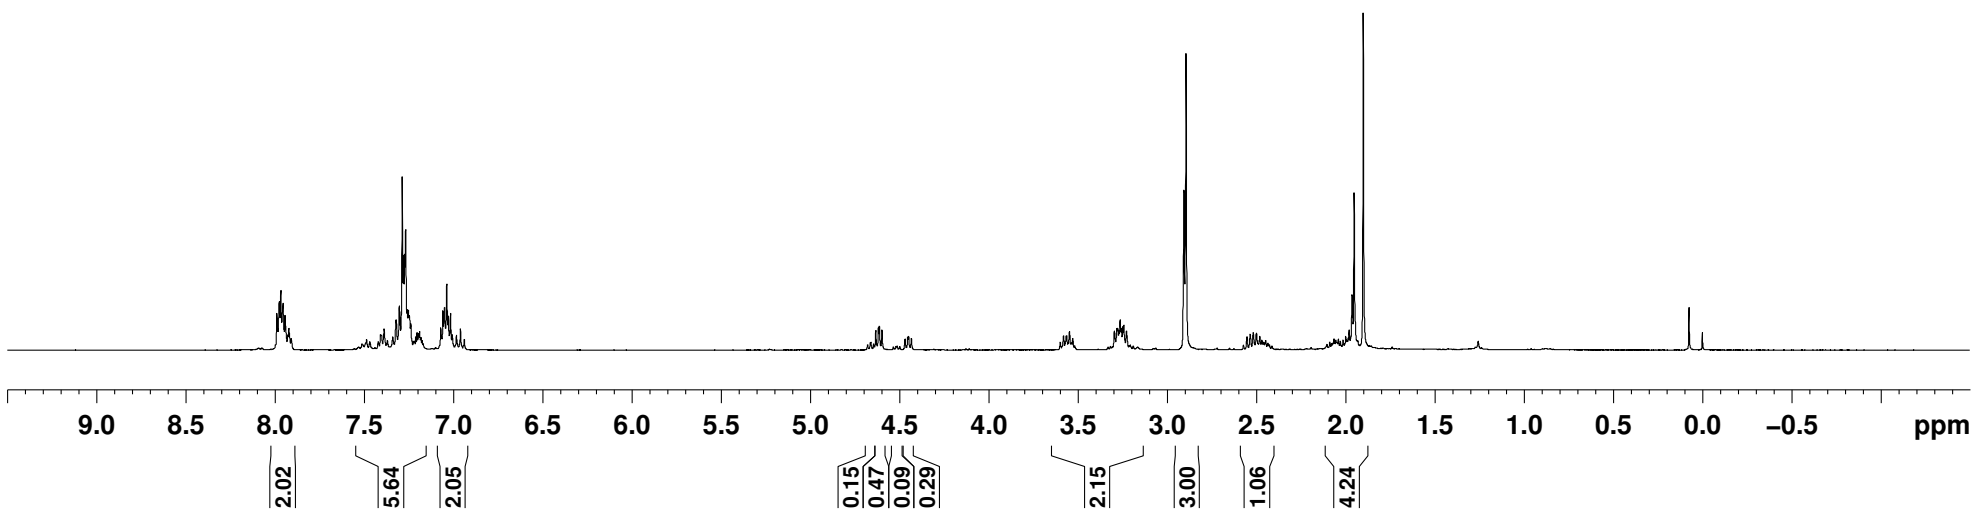

197.59  
196.95

170.71  
170.51  
166.90  
166.78  
164.25  
139.16  
138.51  
133.36  
133.04  
132.75  
132.53  
131.40  
131.31  
129.67  
129.59  
129.47  
129.37  
129.02  
128.66  
128.55  
127.98  
127.85  
127.61  
127.18  
115.87  
115.68  
115.46

77.32  
77.00  
76.69

51.25  
50.79  
50.21  
48.76  
45.85  
45.76  
35.82  
33.07  
32.39  
32.28  
31.58  
31.50  
21.62  
20.99

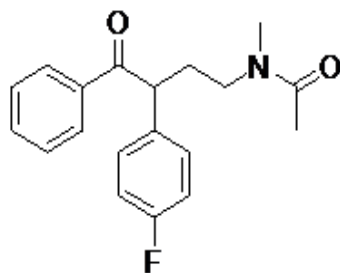

and

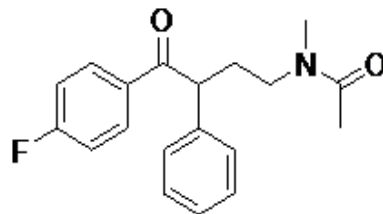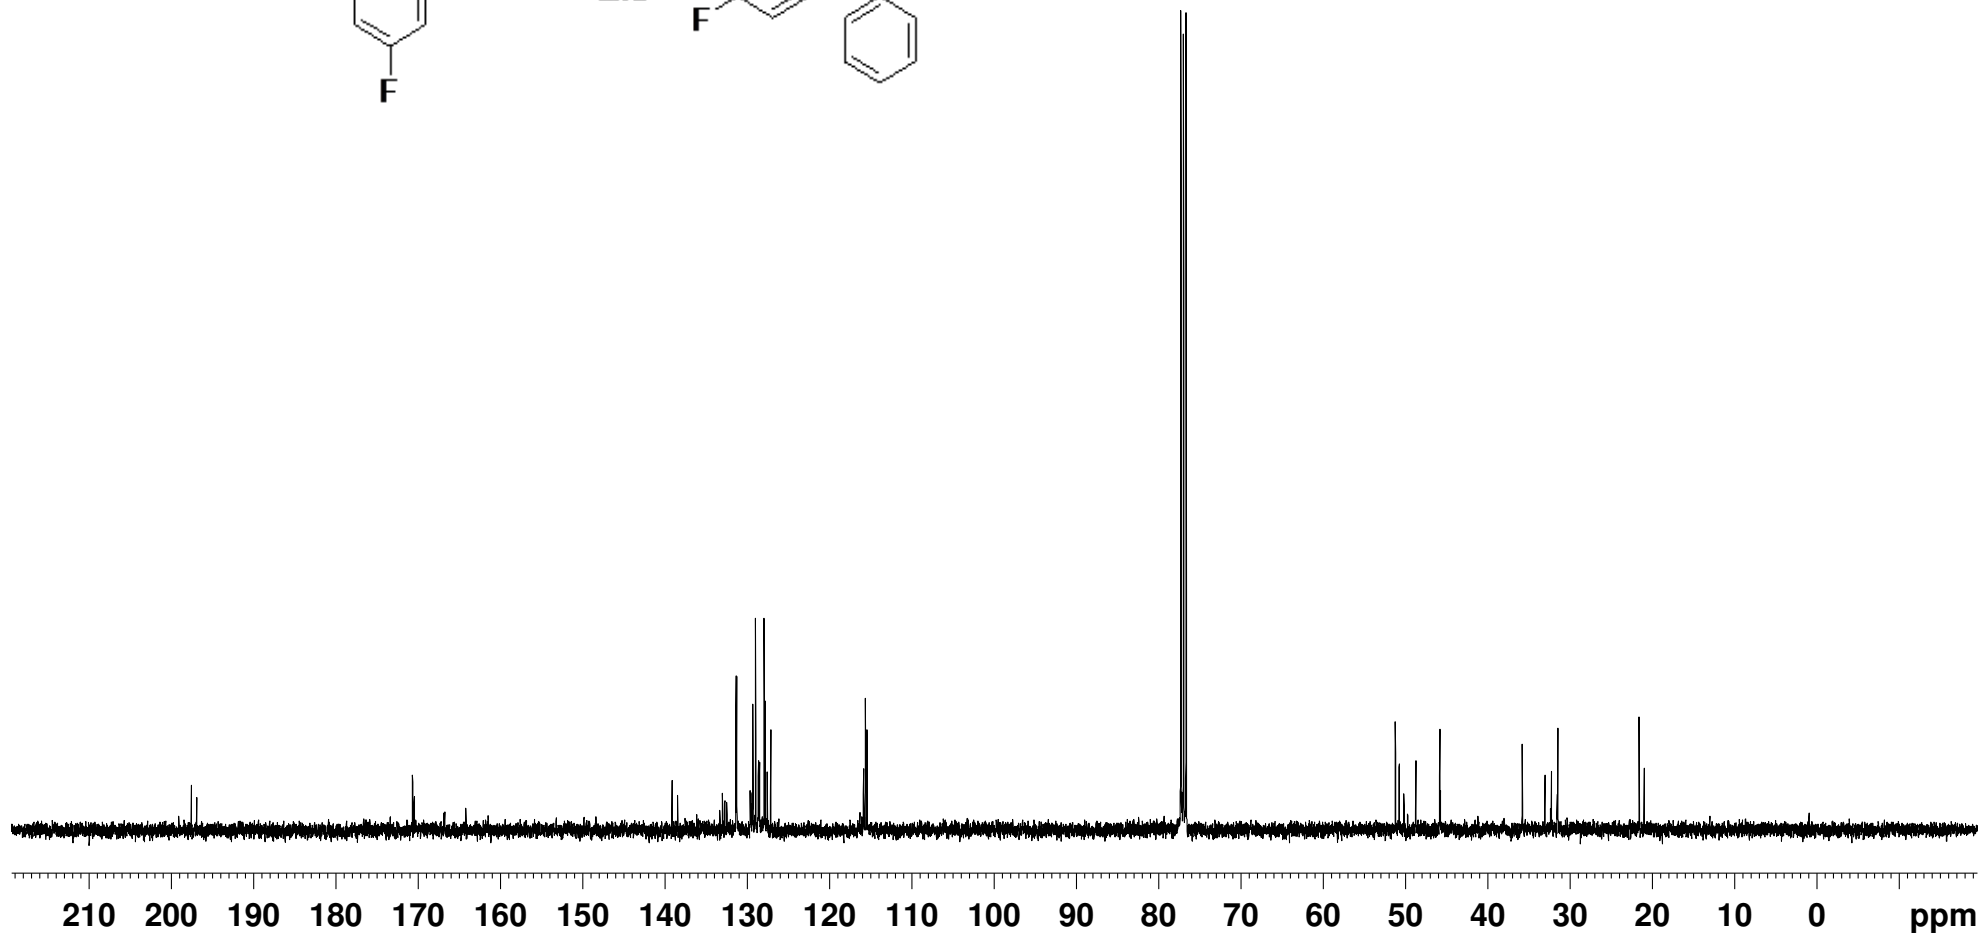

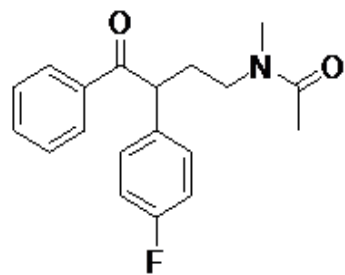

and

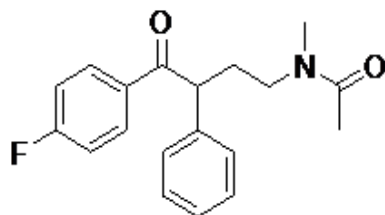

104.550  
105.357  
105.364  
105.379  
105.393  
105.400  
114.509  
114.522  
114.532  
114.545  
115.400  
115.413  
115.427  
115.436  
115.450

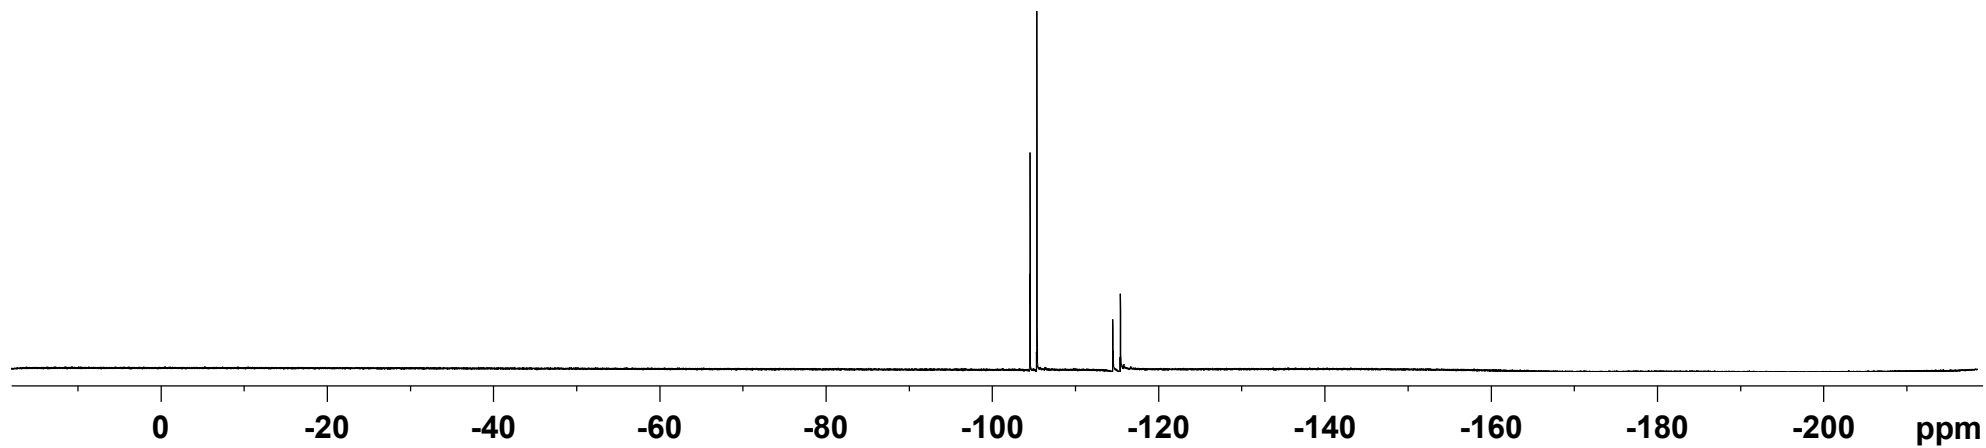

N-(3-(4-Fluorophenyl)-3-methyl-4-oxo-4-phenylbutyl)-N-methylacetamide (3sa) and N-(4-(4-Fluorophenyl)-3-methyl-4-oxo-3-phenylbutyl)-N-methylacetamide (3sa')

7.546  
7.530  
7.525  
7.510  
7.492  
7.487  
7.471  
7.450  
7.430  
7.412  
7.396  
7.379  
7.361  
7.341  
7.322  
7.304  
7.280  
7.271  
7.260  
7.238  
7.219  
7.117  
7.096  
7.076  
7.057  
7.036  
6.935  
6.912  
6.891  
6.869

3.366  
3.350  
3.339  
3.325  
3.312  
3.294  
3.278  
3.270  
3.253  
3.215  
3.200  
3.190  
3.176  
3.143  
3.131  
3.116  
3.100  
2.819  
2.805  
2.232  
2.218  
2.195  
2.176  
1.968  
1.857  
1.678

— 0.000

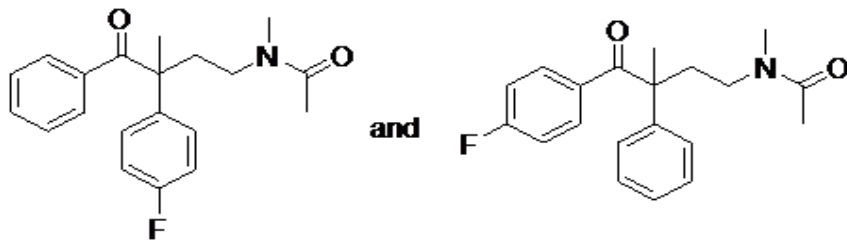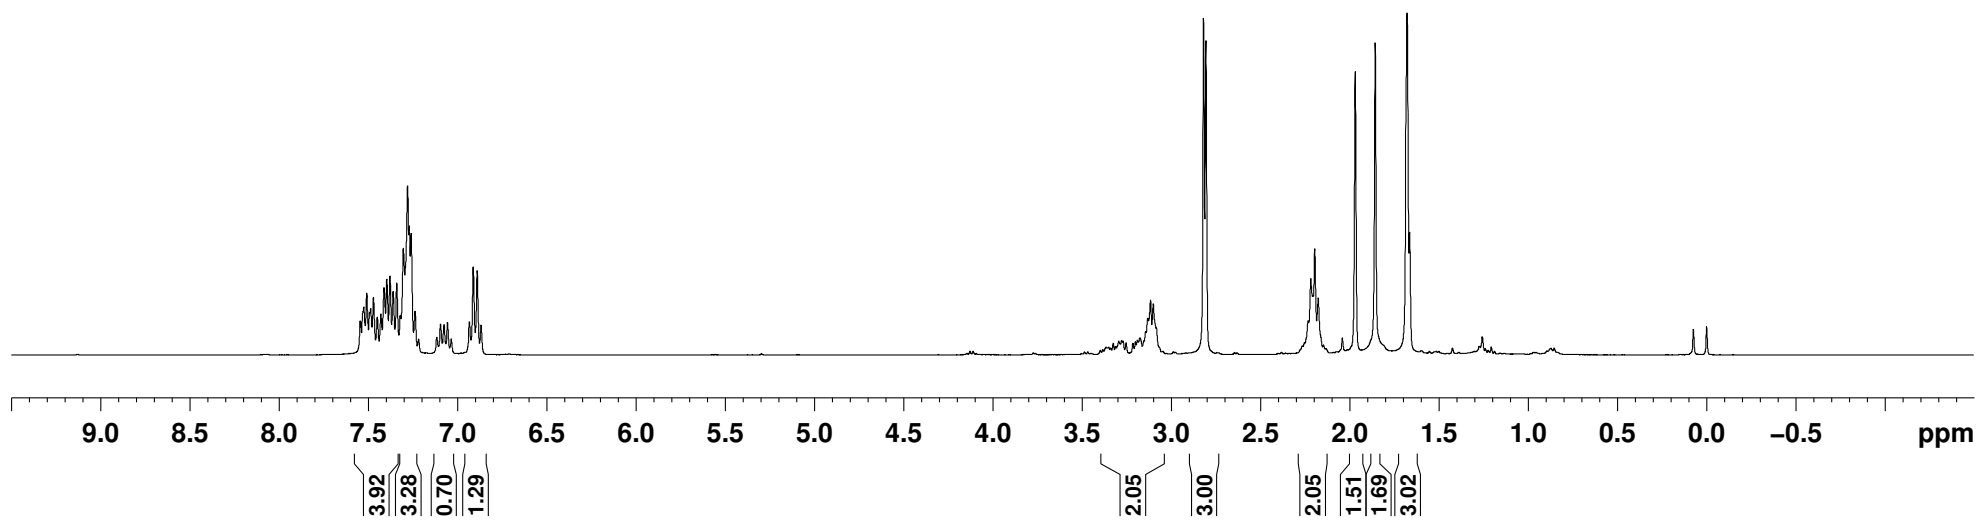



202.23  
 201.46  
 200.83  
 170.21  
 163.51  
 143.19  
 142.65  
 136.34  
 135.75  
 132.50  
 132.39  
 132.30  
 132.25  
 132.21  
 132.12  
 131.90  
 131.84  
 129.51  
 129.36  
 129.31  
 129.11  
 128.21  
 128.04  
 127.75  
 127.65  
 127.55  
 127.16  
 126.00  
 125.96  
 116.30  
 116.09  
 116.03  
 115.81  
 115.32  
 115.15  
 115.10  
 114.93  
 77.32  
 77.00  
 76.68  
 53.37  
 53.21  
 52.92  
 52.73  
 46.93  
 43.81  
 39.22  
 39.12  
 37.11  
 35.88  
 33.15  
 23.93  
 23.57  
 23.32  
 23.14  
 21.76  
 20.68

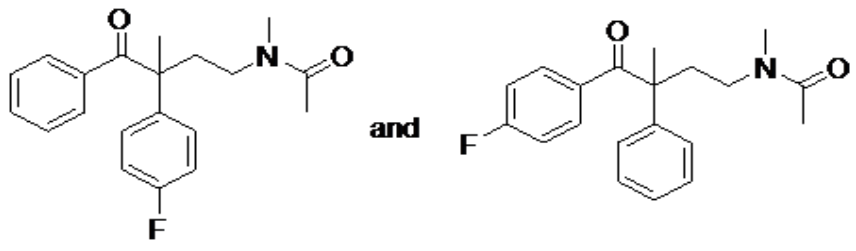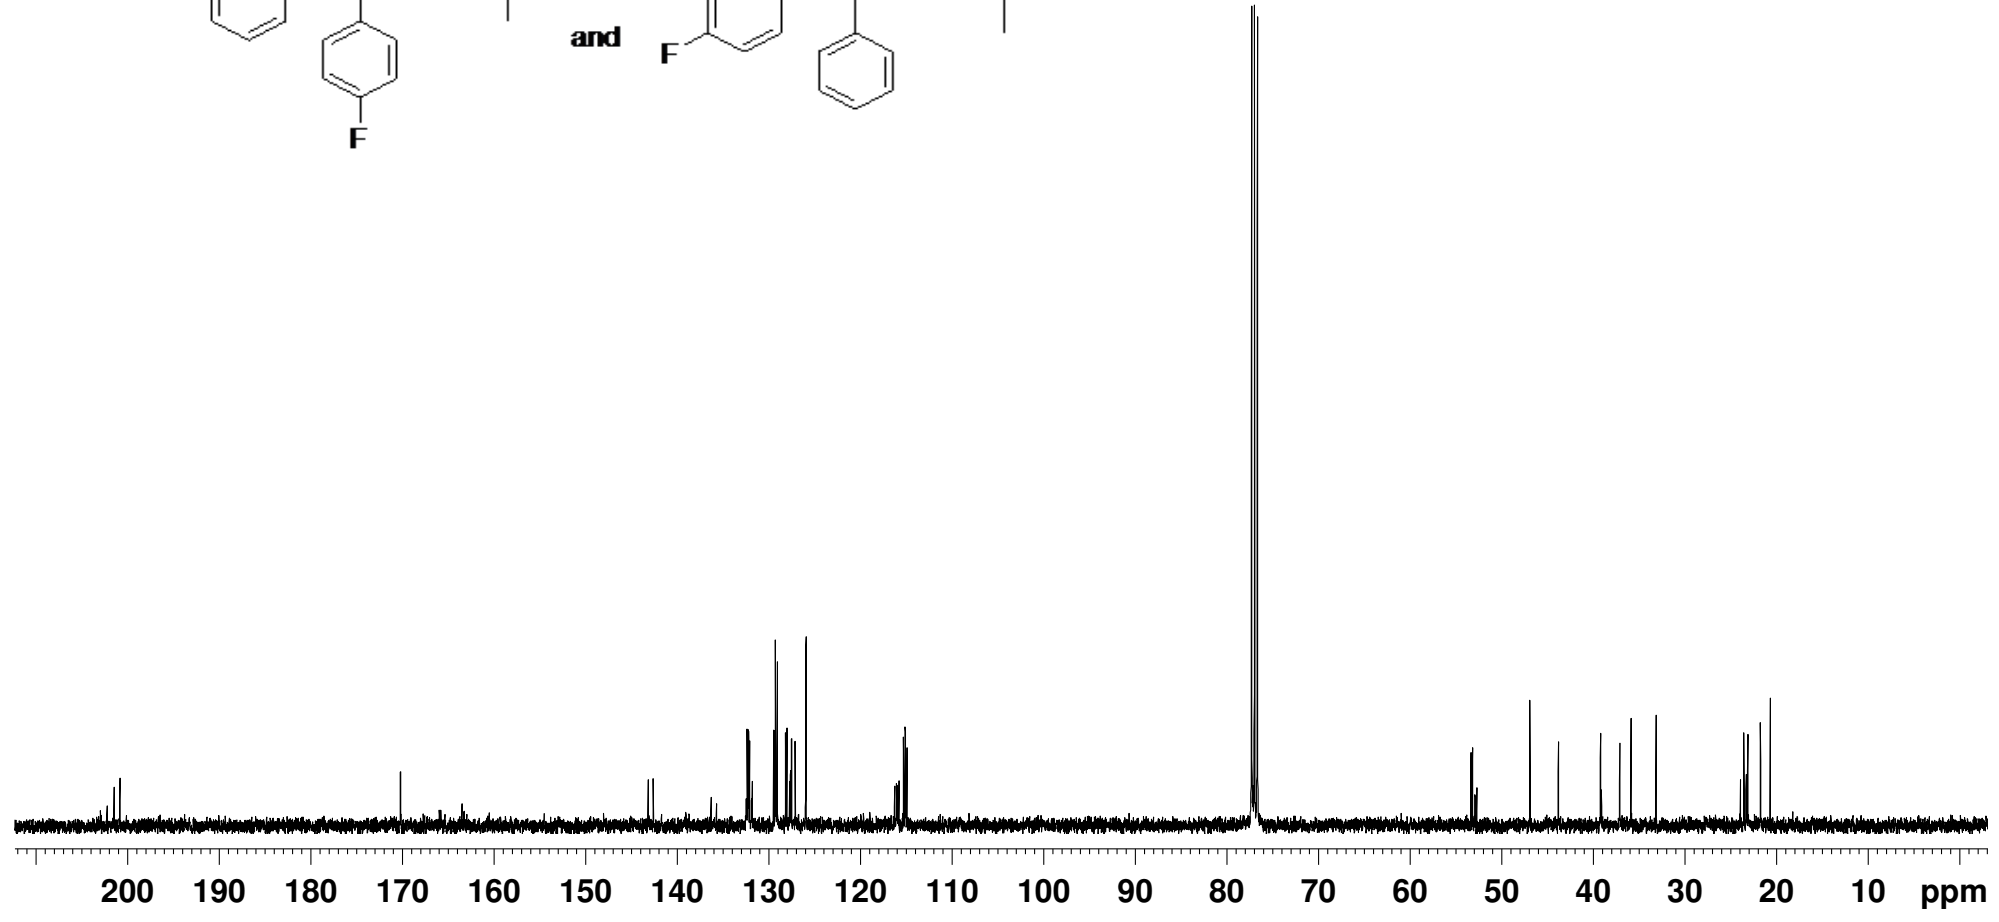

-105.93  
-105.94  
-105.95  
-105.96  
-105.98  
-106.00  
-106.67  
-106.69  
-106.69  
-106.71  
-106.72  
-106.75  
-114.57  
-114.58  
-114.59  
-114.60  
-114.61  
-114.63  
-115.37  
-115.39  
-115.40  
-115.42

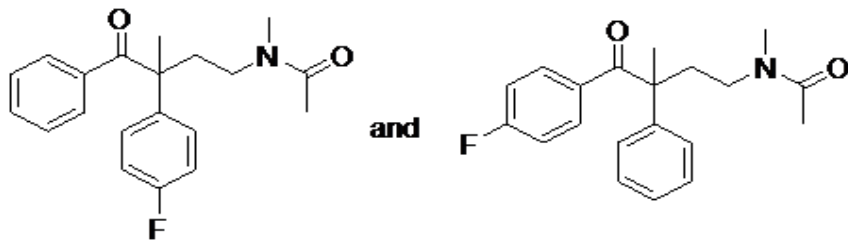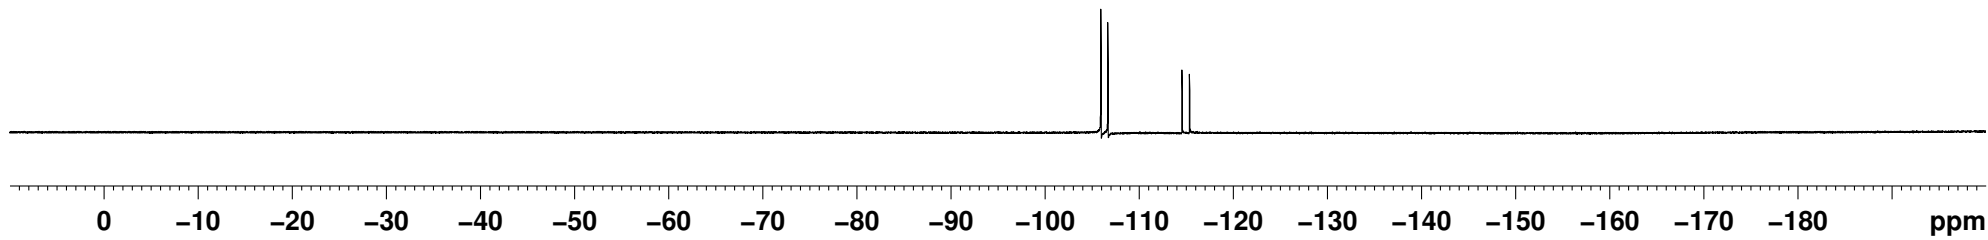

N-Methyl-N-(4-oxo-4-phenyl-3-(4-(trifluoromethyl)phenyl)butyl)acetamide (3ta)

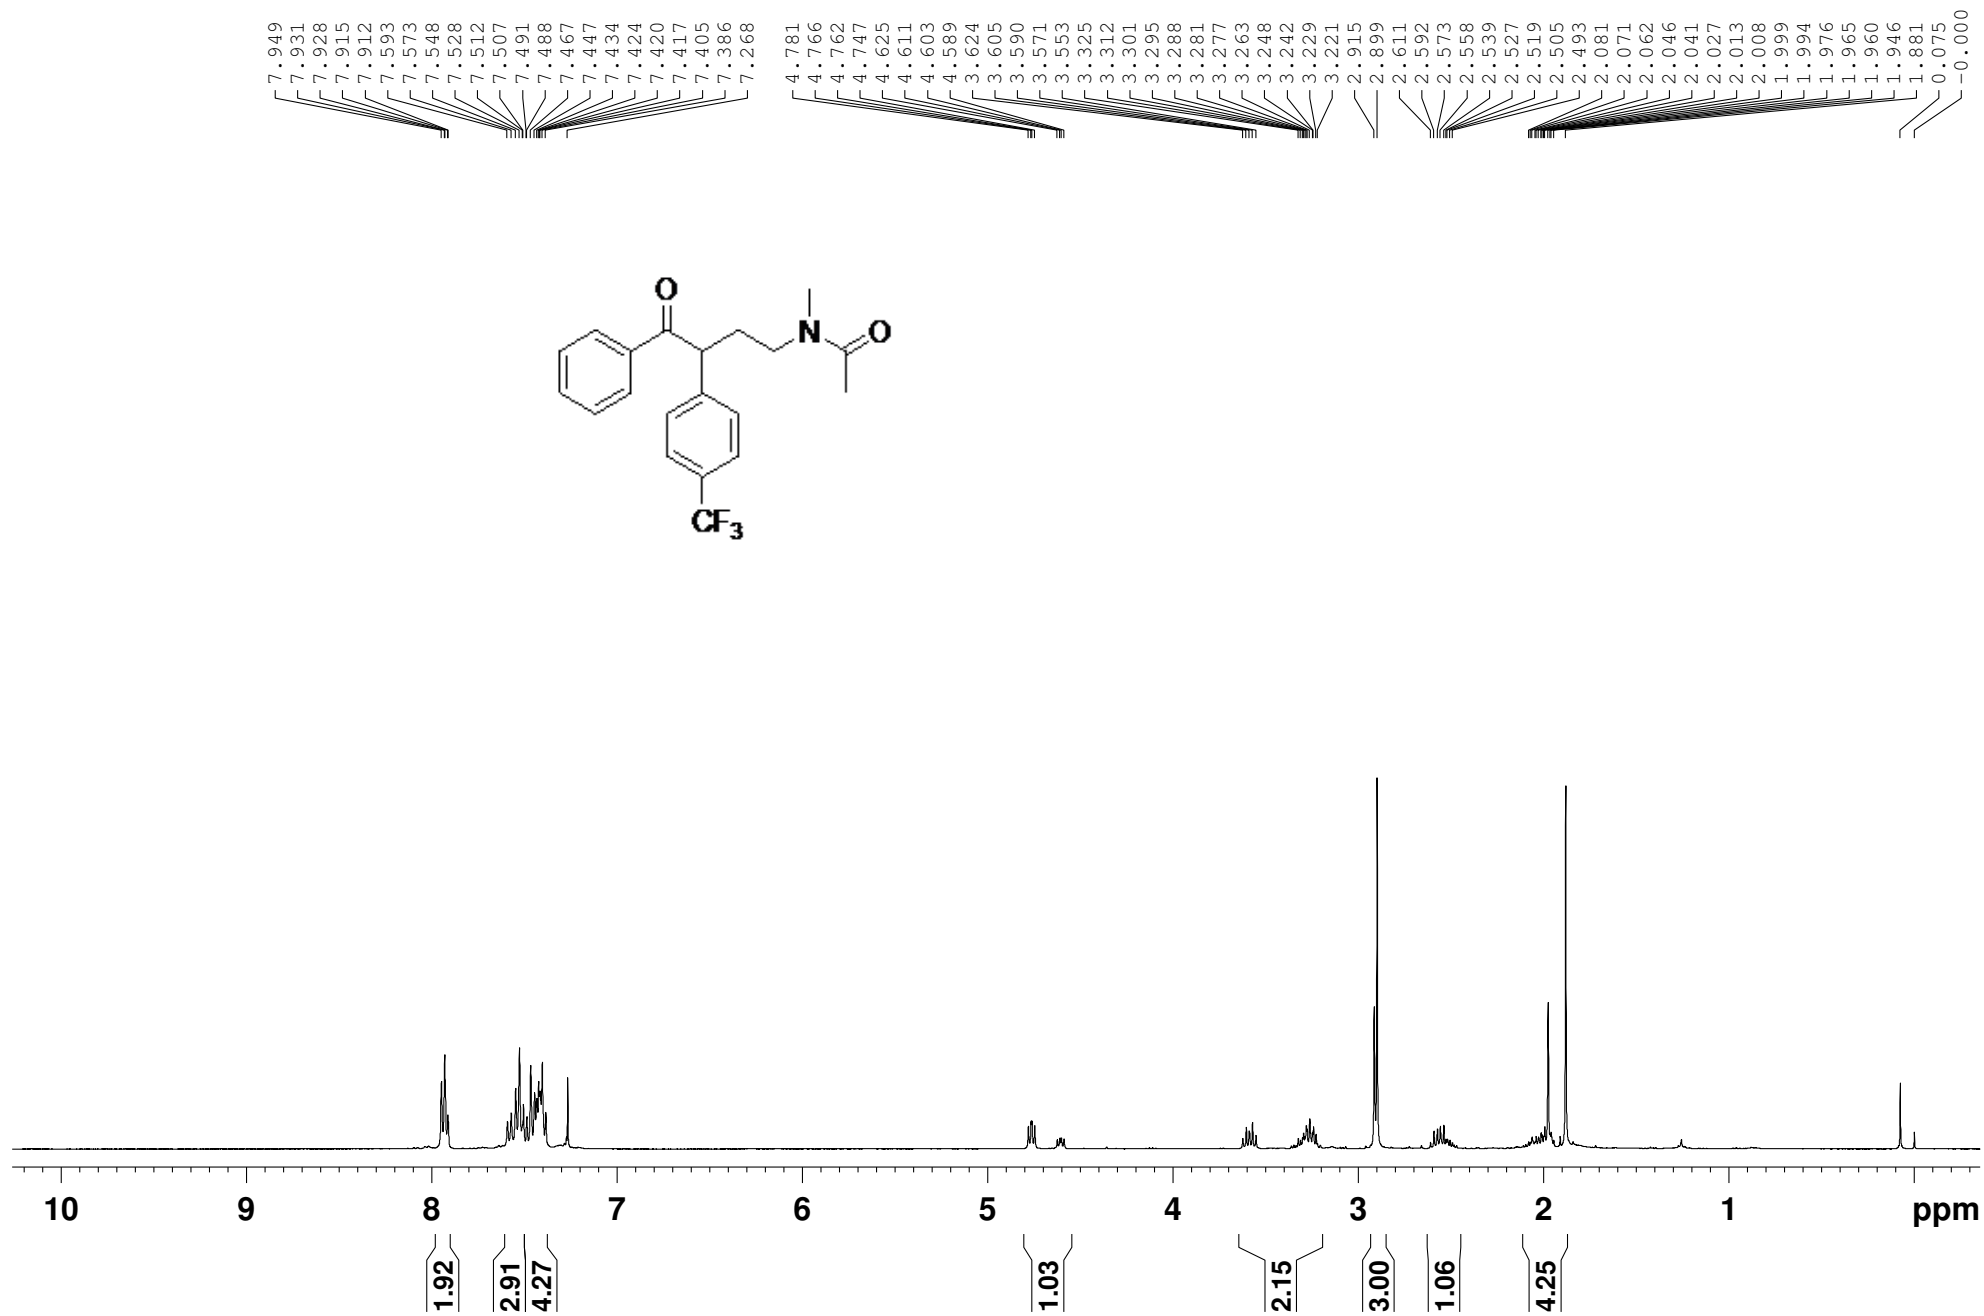

198.57  
197.90

170.82  
170.47  
143.30  
142.70  
136.03  
135.84  
133.64  
133.29  
128.83  
128.68  
128.66  
128.48  
128.32  
126.26  
126.22  
125.87  
125.84  
125.80

77.32  
77.00  
76.69

50.80  
50.33  
48.76  
45.74  
35.86  
33.11  
32.39  
31.61  
21.58  
21.03

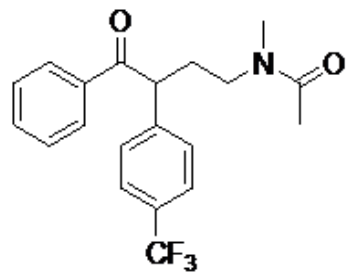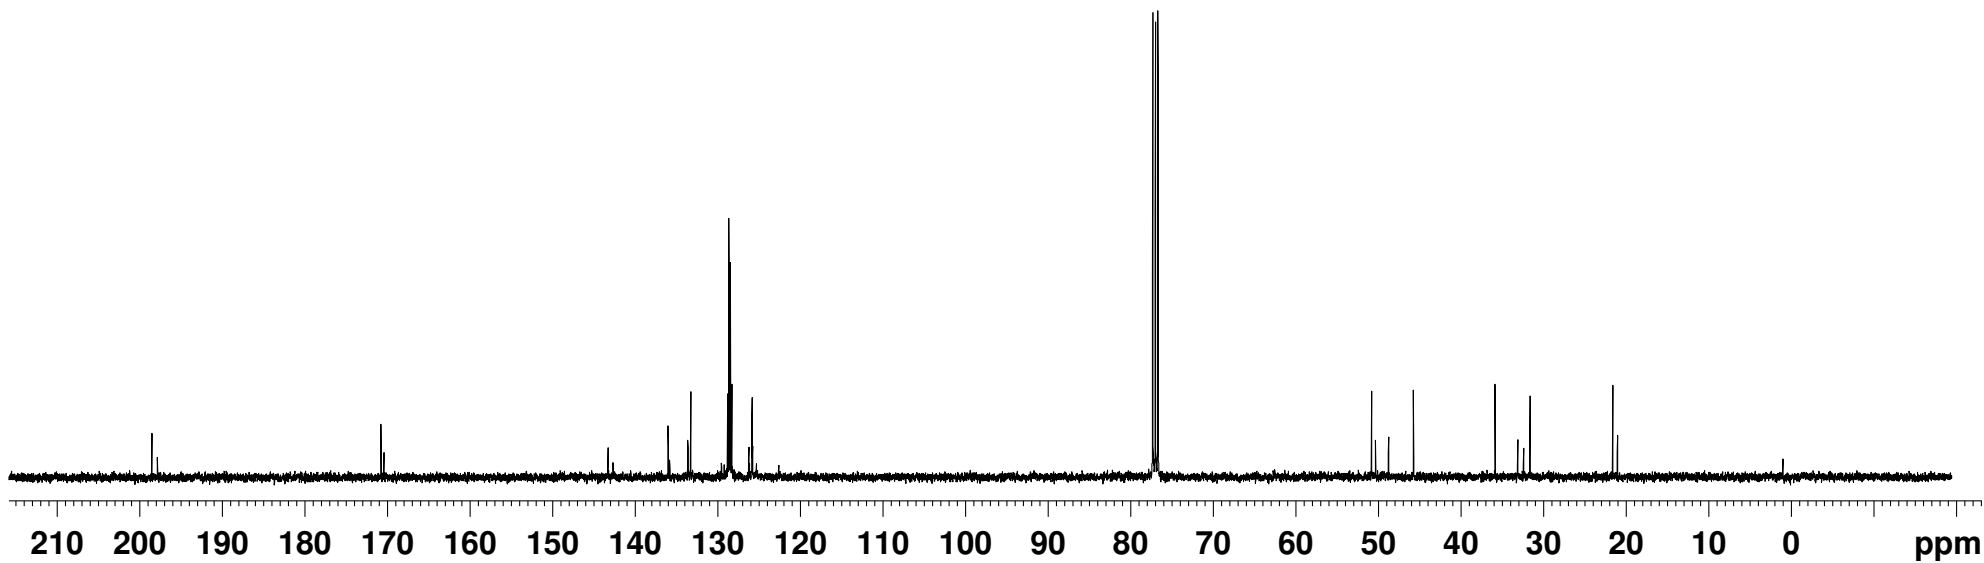

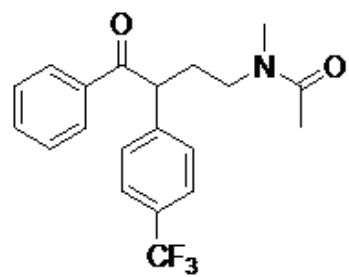

62.59  
62.66

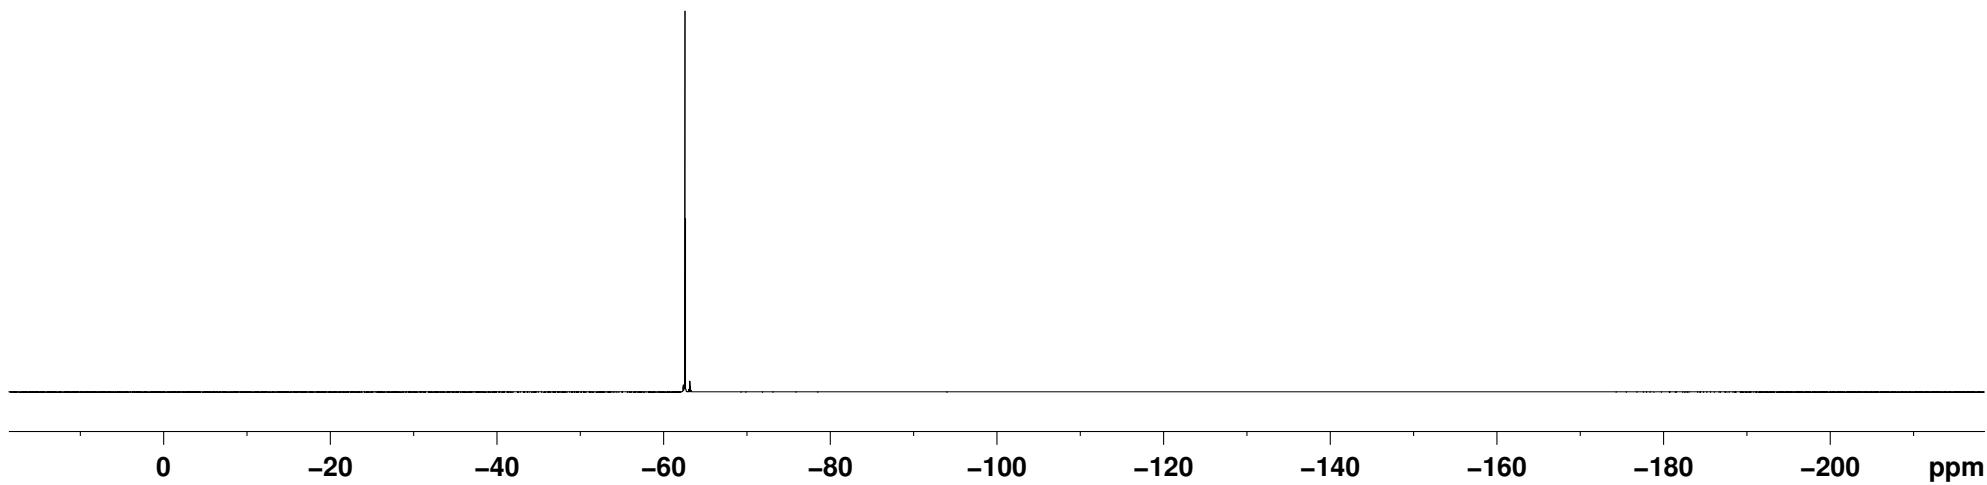

N-(4-(Biphenyl-4-yl)-4-oxo-3-phenylbutyl)-N-methylacetamide (3ua)

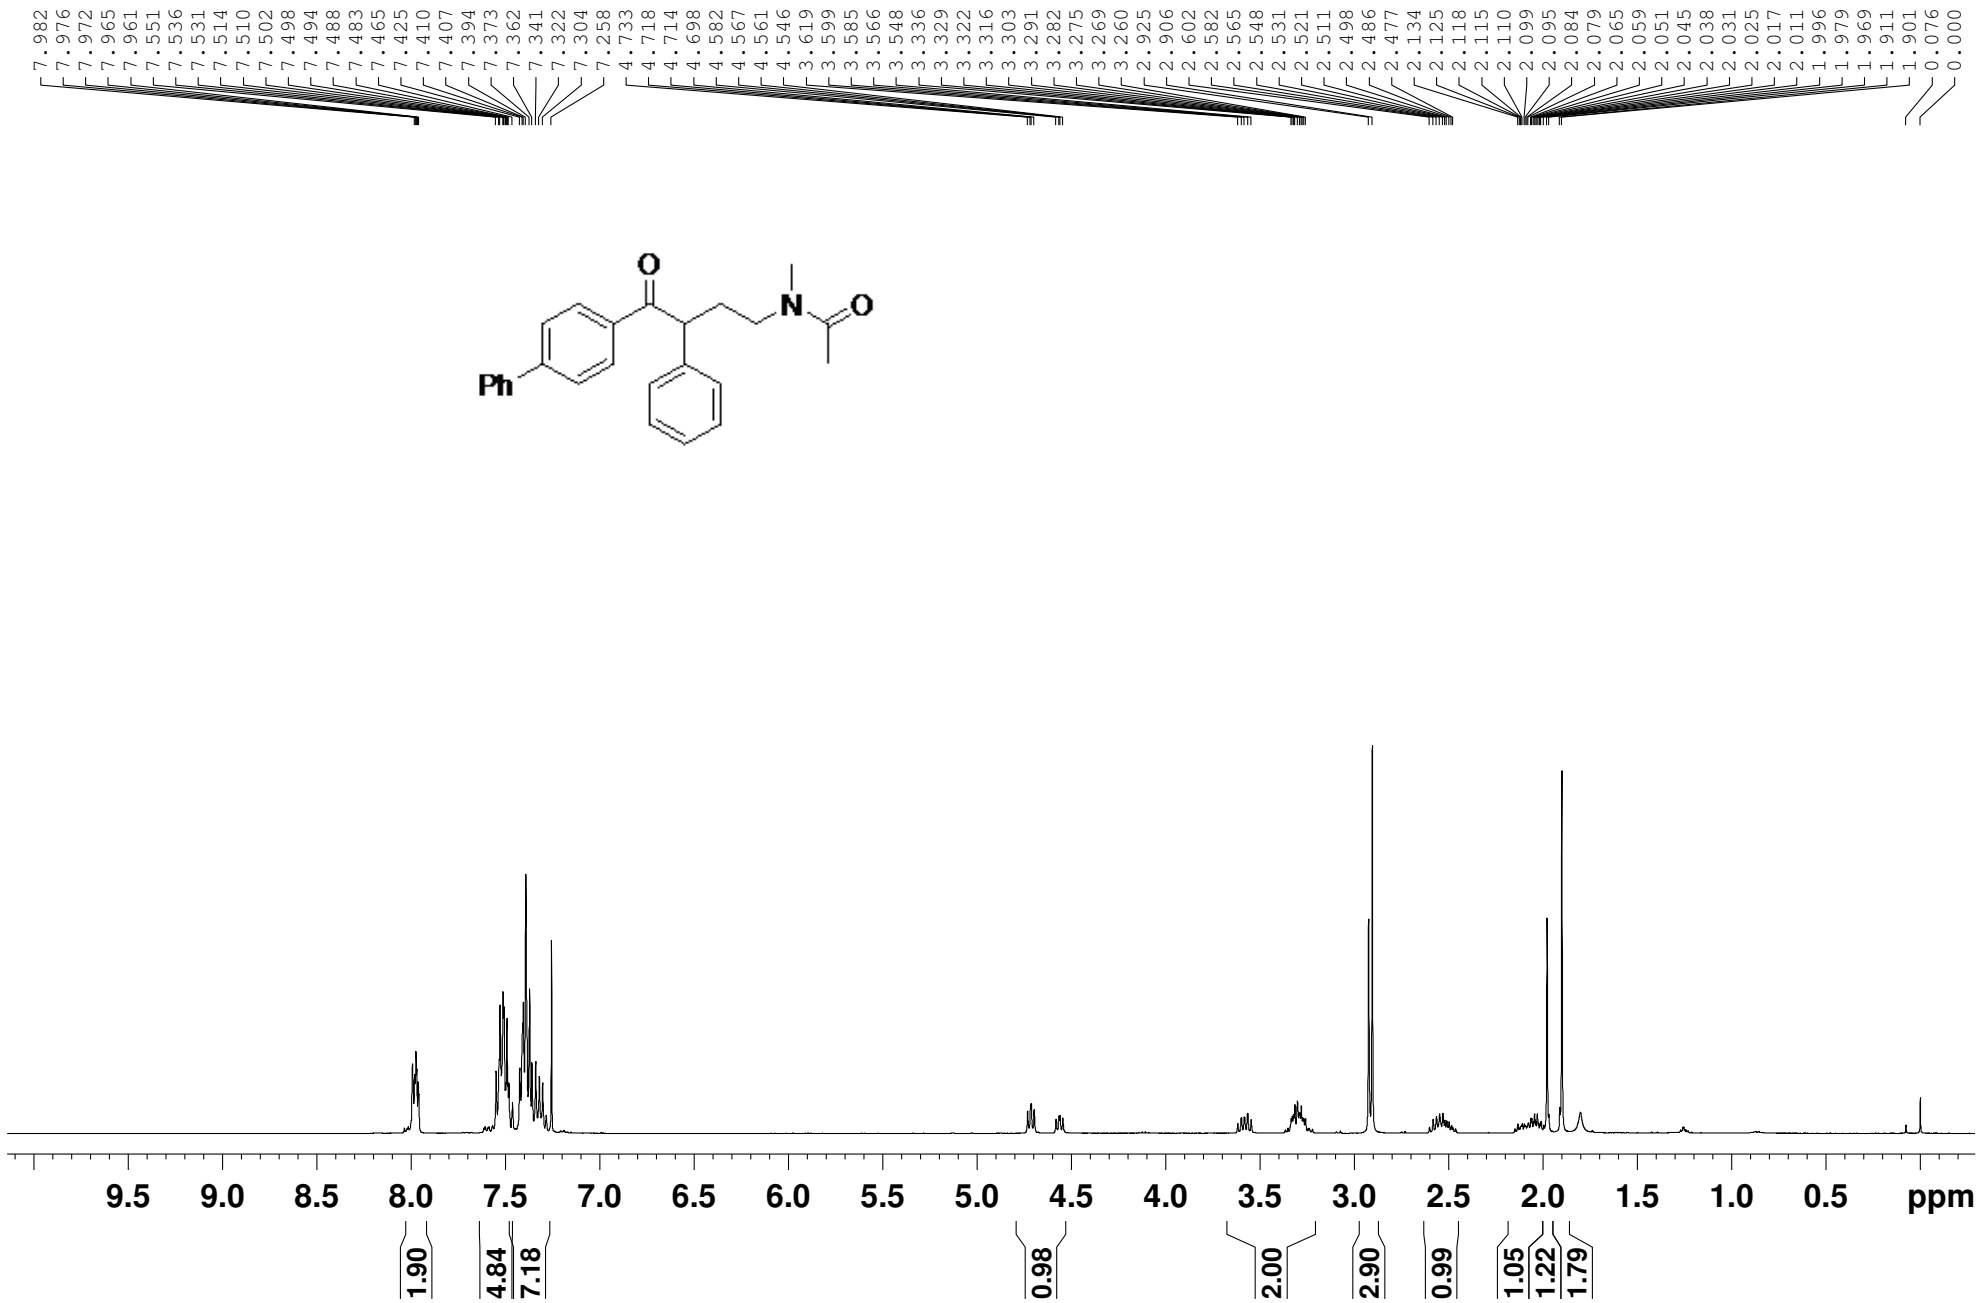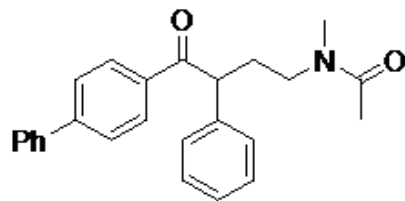

199.13  
198.53

170.67  
170.51  
140.47  
140.40  
140.21  
139.94  
138.24  
137.58  
136.38  
136.18  
133.27  
132.97  
128.76  
128.74  
128.71  
128.69  
128.67  
128.52  
128.48  
128.35  
127.92  
127.61  
127.44  
127.25  
126.91

77.31  
77.00  
76.68

50.79  
50.32  
48.85  
45.85

35.85  
33.09  
32.33  
31.53

21.64  
21.05

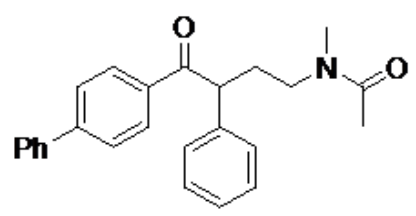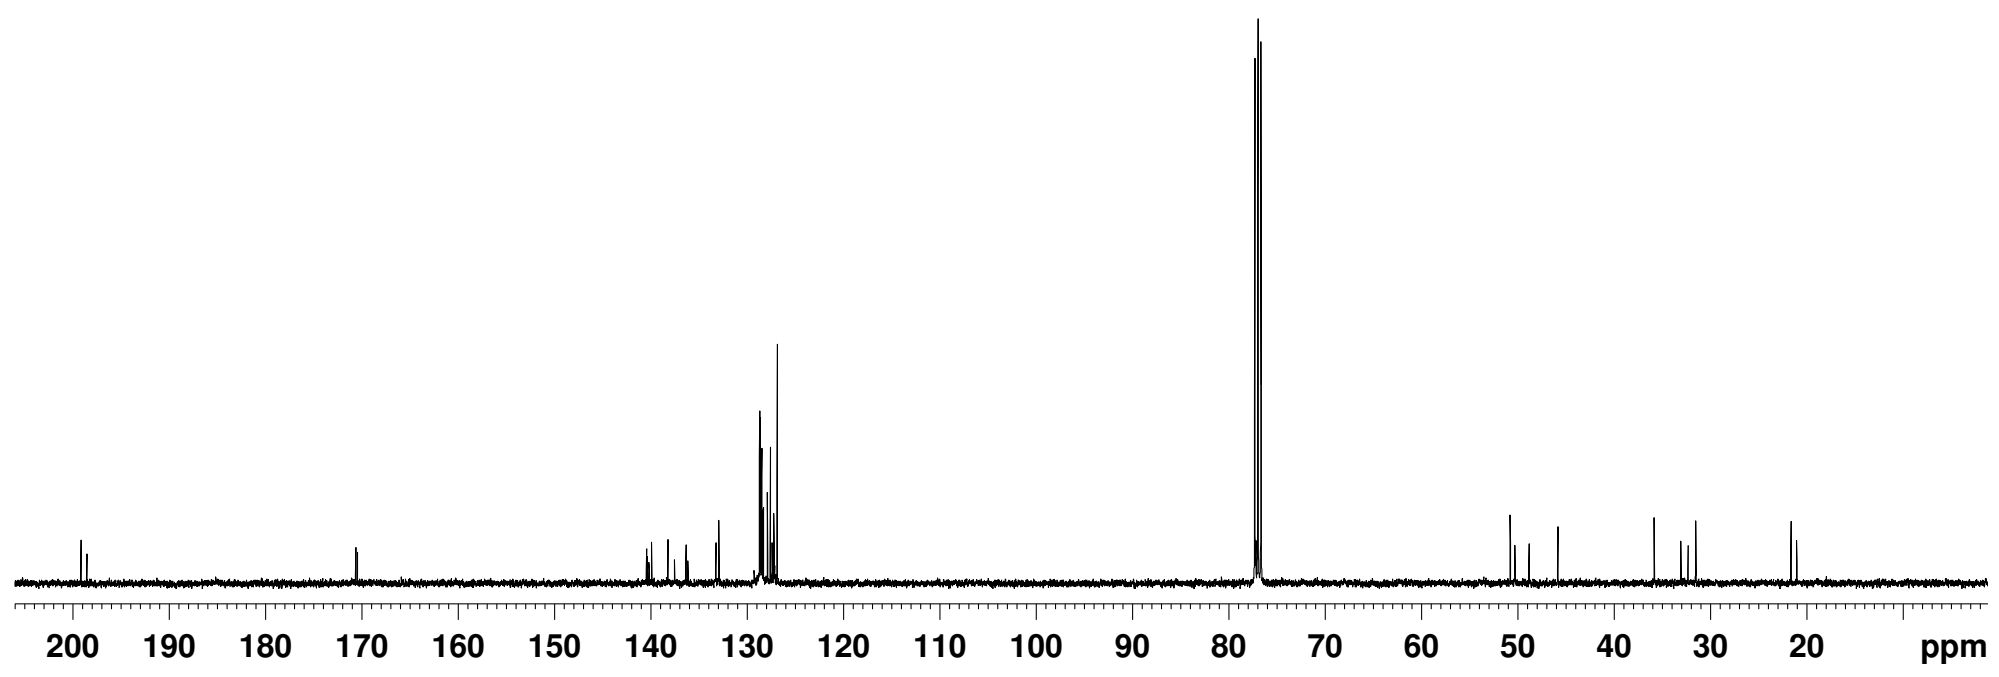

N-Methyl-N-(4-(naphthalen-1-yl)-4-oxo-3-phenylbutyl)acetamide (3va)

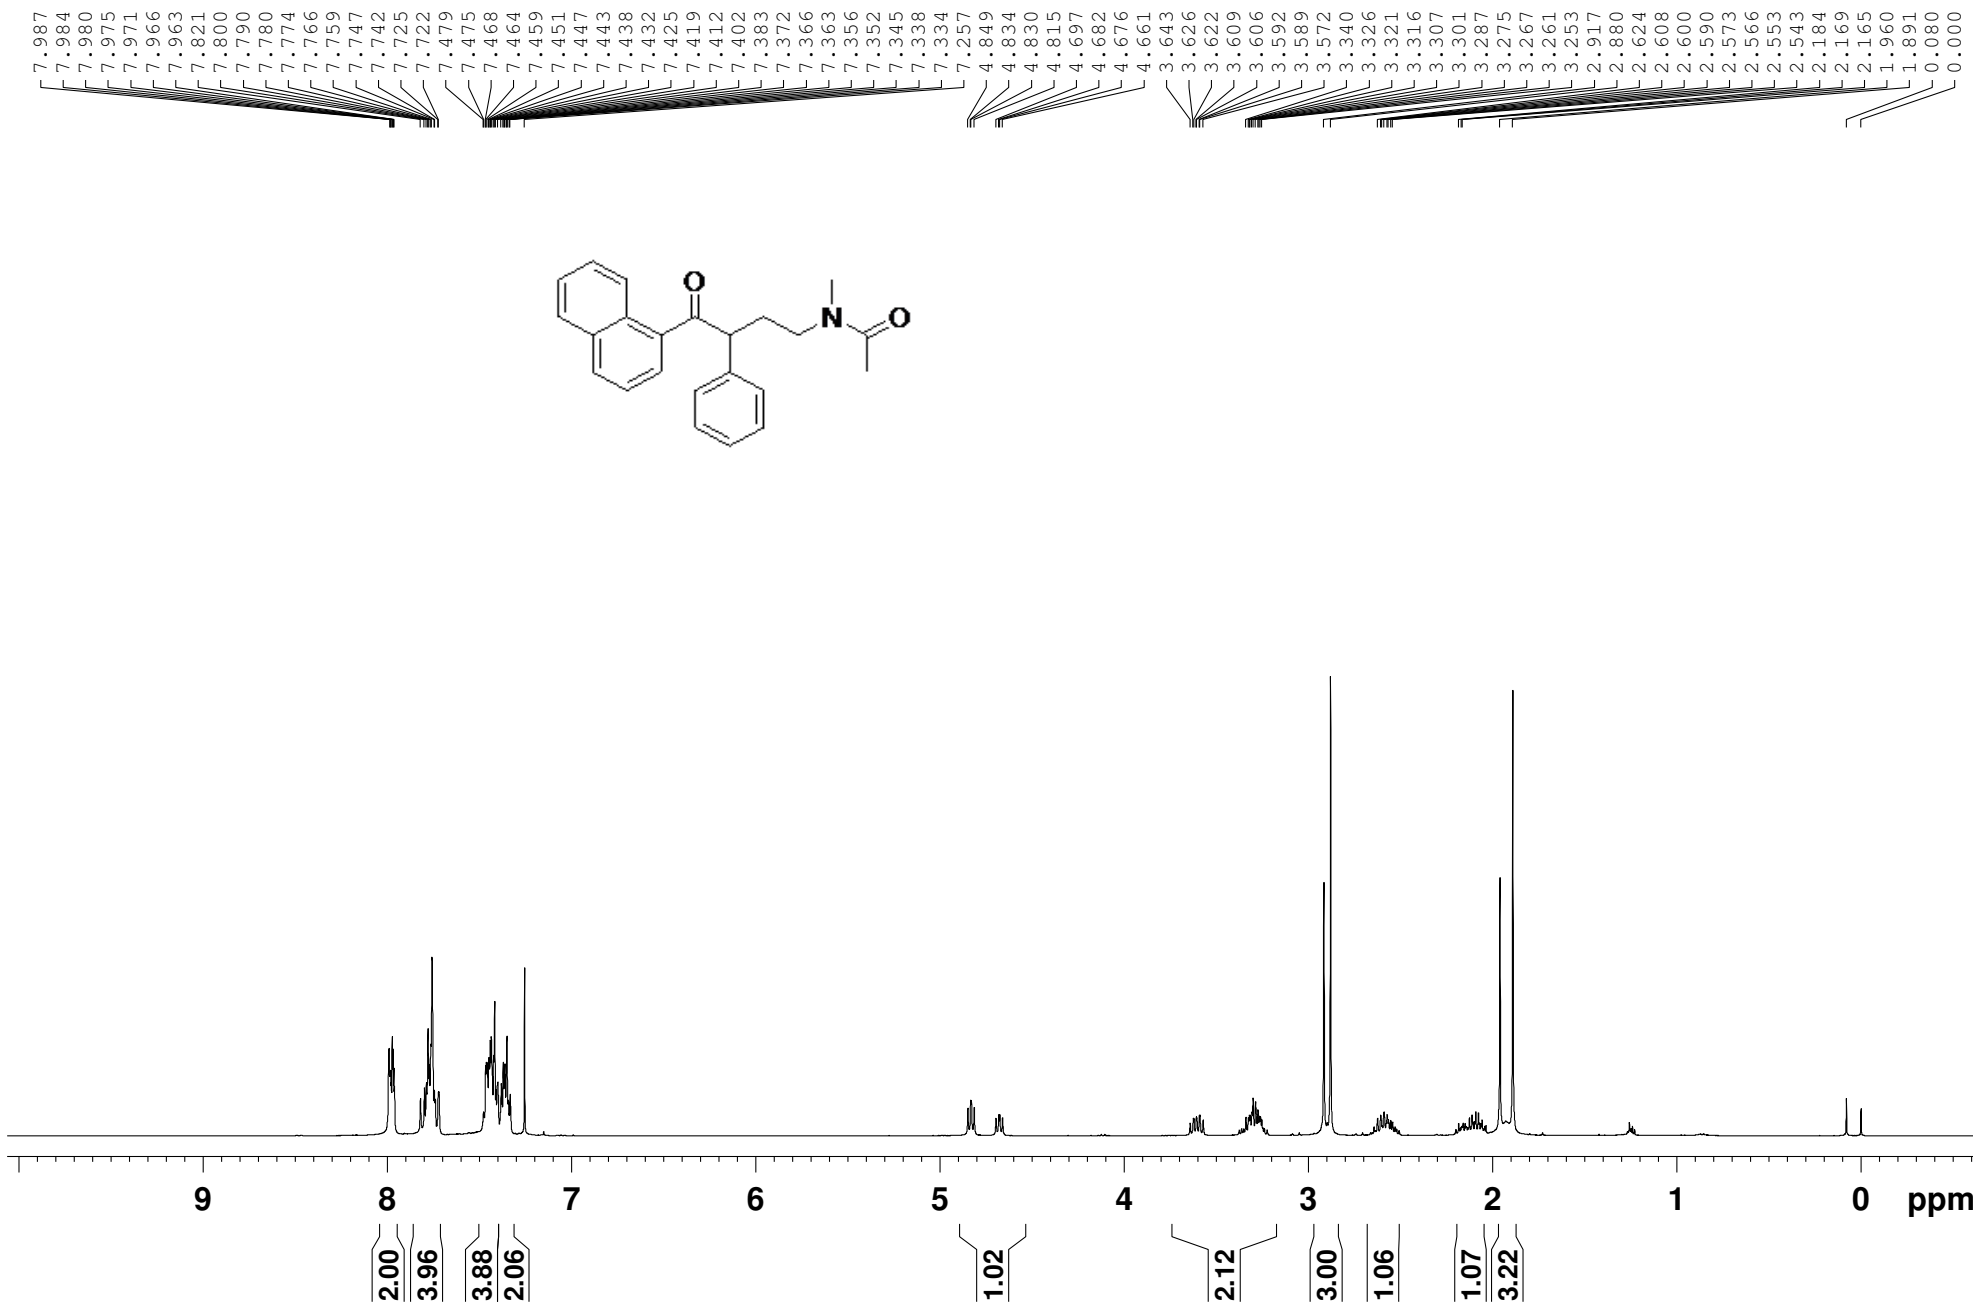



199.11  
198.52

170.66  
170.50  
136.72  
136.38  
136.15  
136.05  
133.55  
133.21  
132.90  
132.51  
132.41  
129.21  
128.77  
128.71  
128.62  
128.47  
127.71  
127.66  
127.63  
127.54  
126.95  
126.46  
126.16  
125.96  
125.84  
125.57

77.32  
77.00  
76.68

51.32  
50.82  
48.86  
45.88  
35.84  
33.07  
32.29  
31.51  
21.63  
21.03

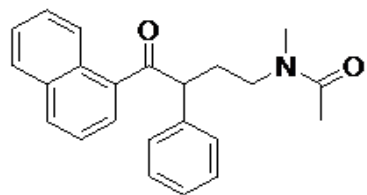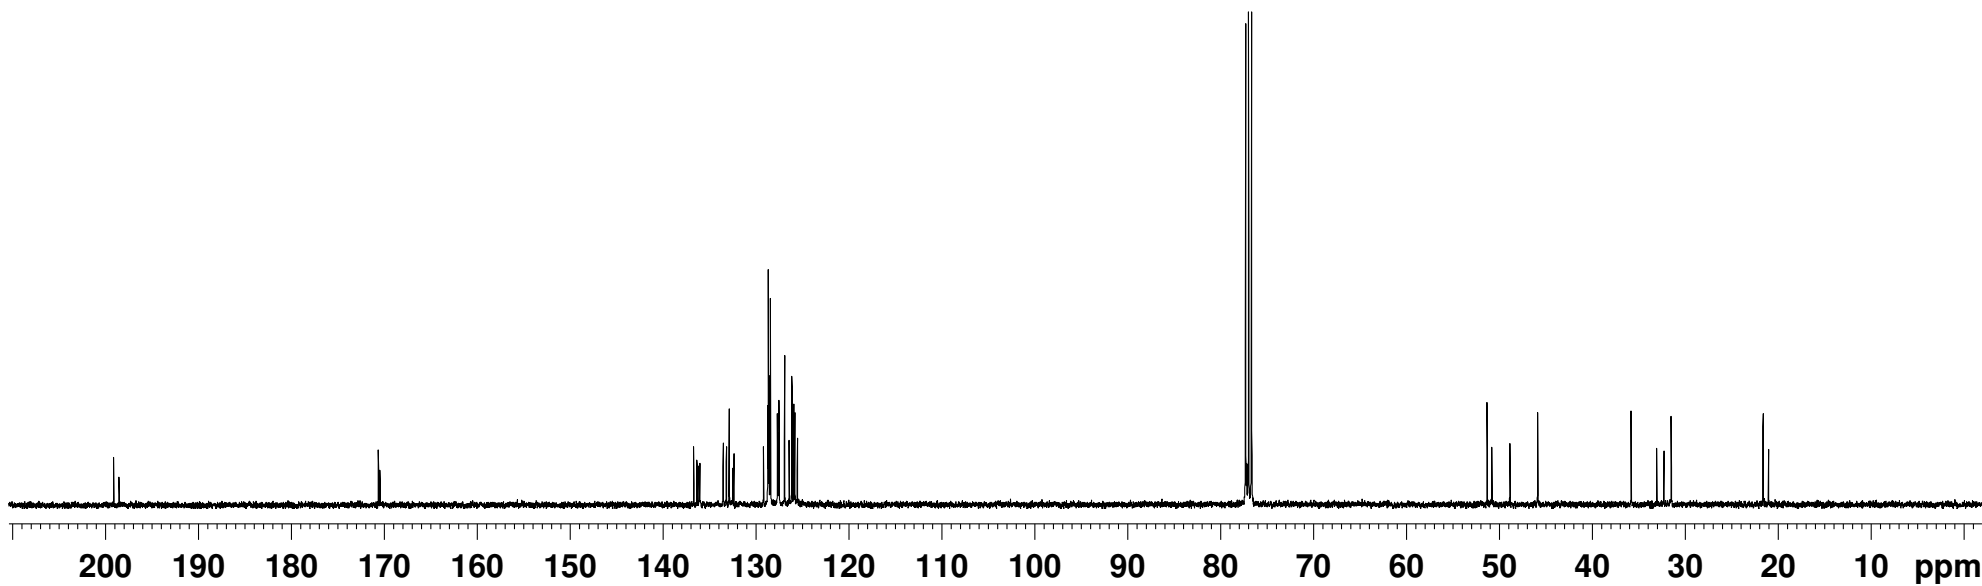

N-Methyl-N-((2,2,6,6-tetramethylpiperidin-1-yloxy)methyl)acetamide (4)

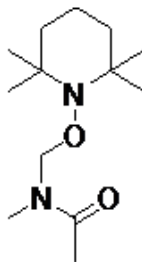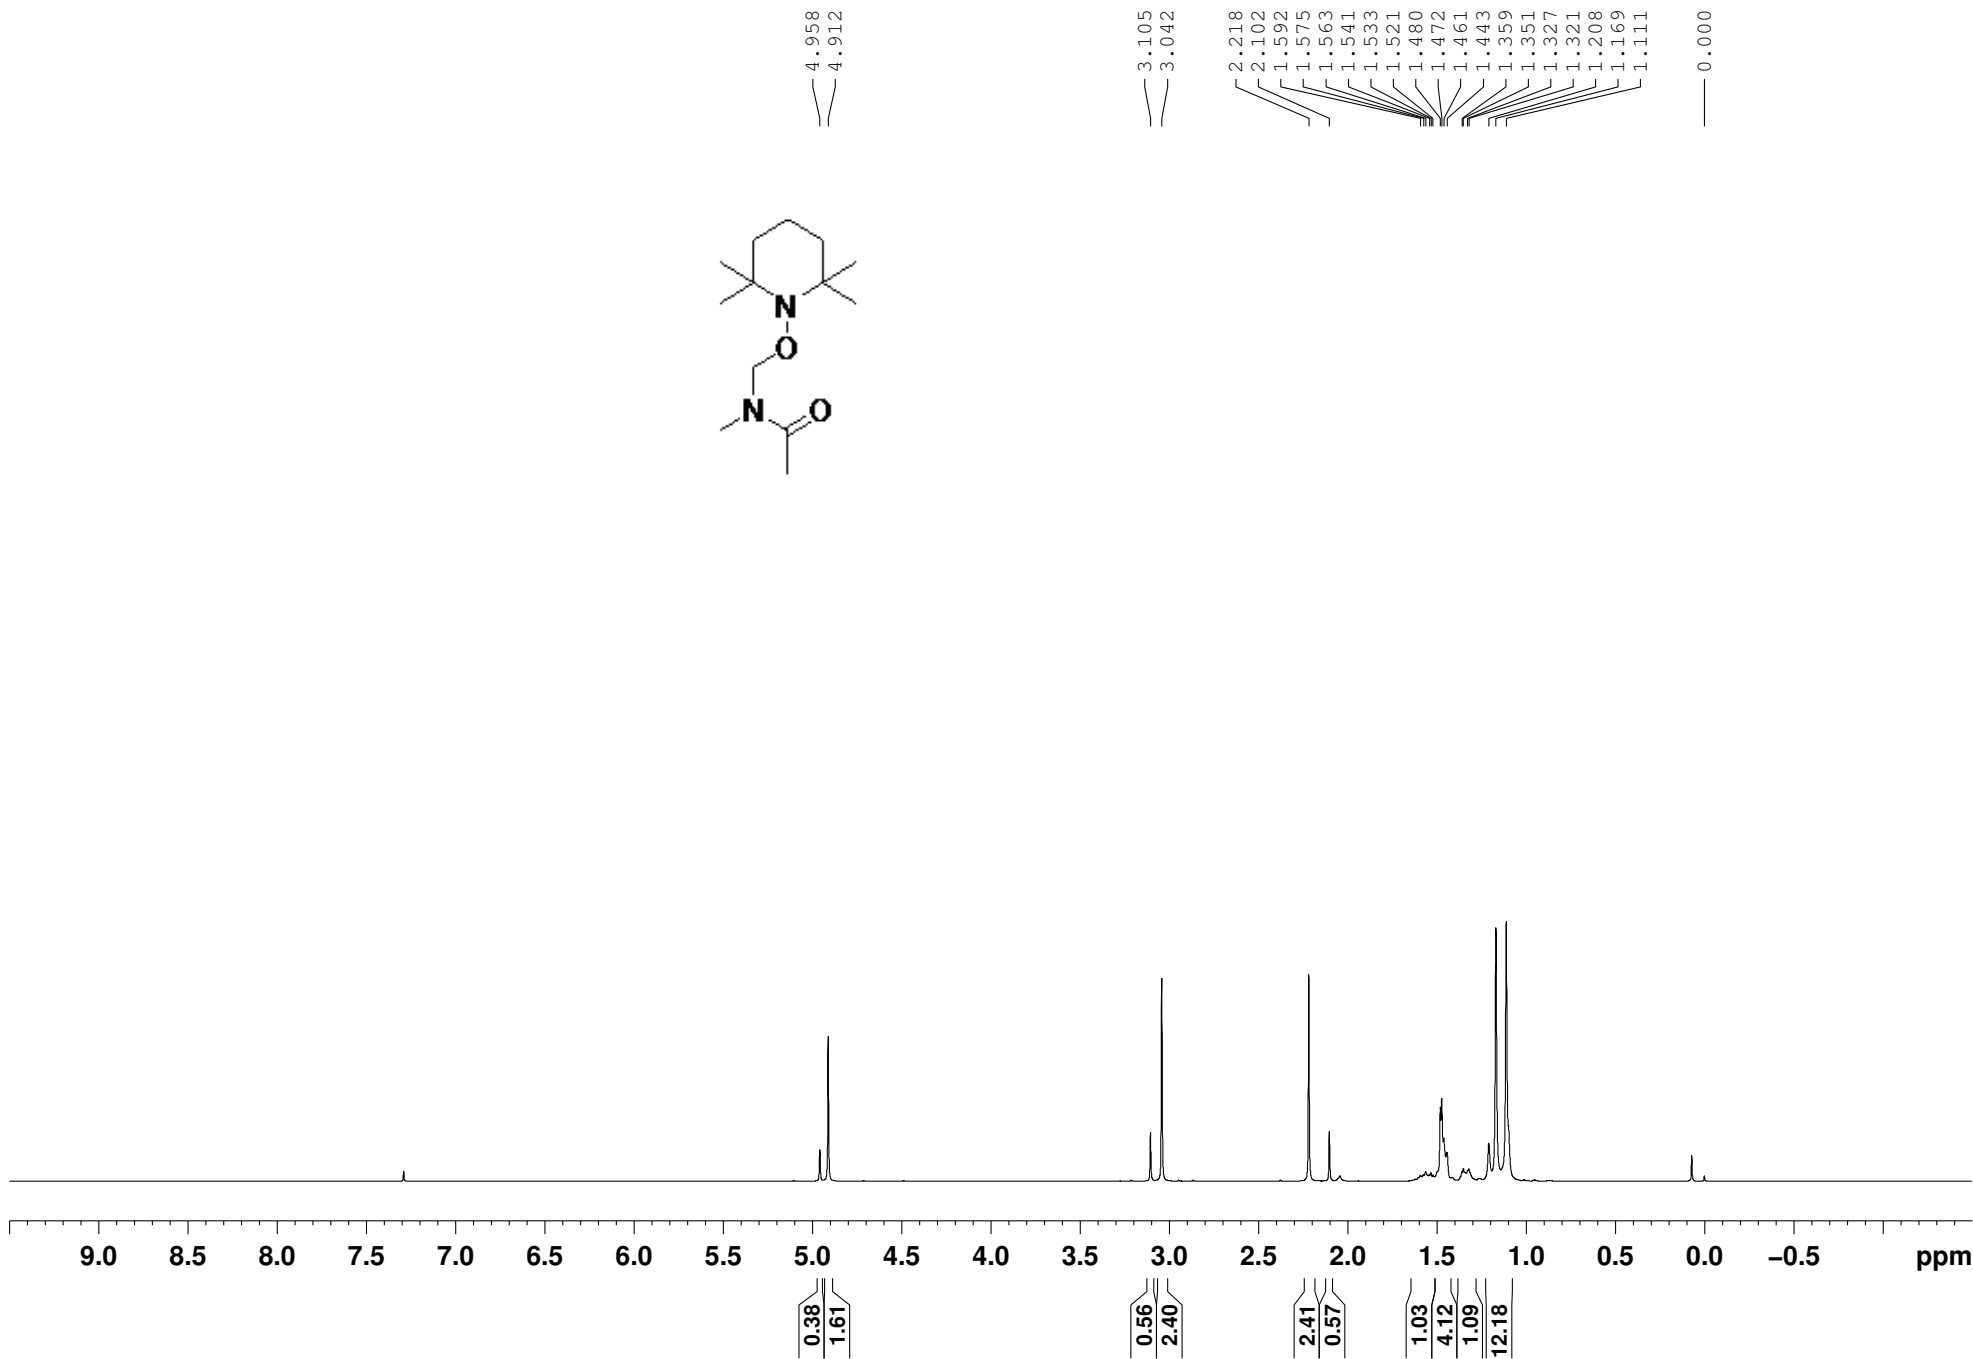

171.634  
171.138

85.438  
81.432  
77.321  
77.003  
76.685

59.910  
59.716

39.784  
39.693  
35.923  
34.025  
33.103  
32.904  
21.988  
21.483  
20.010  
17.030  
16.945

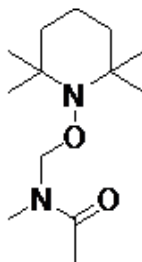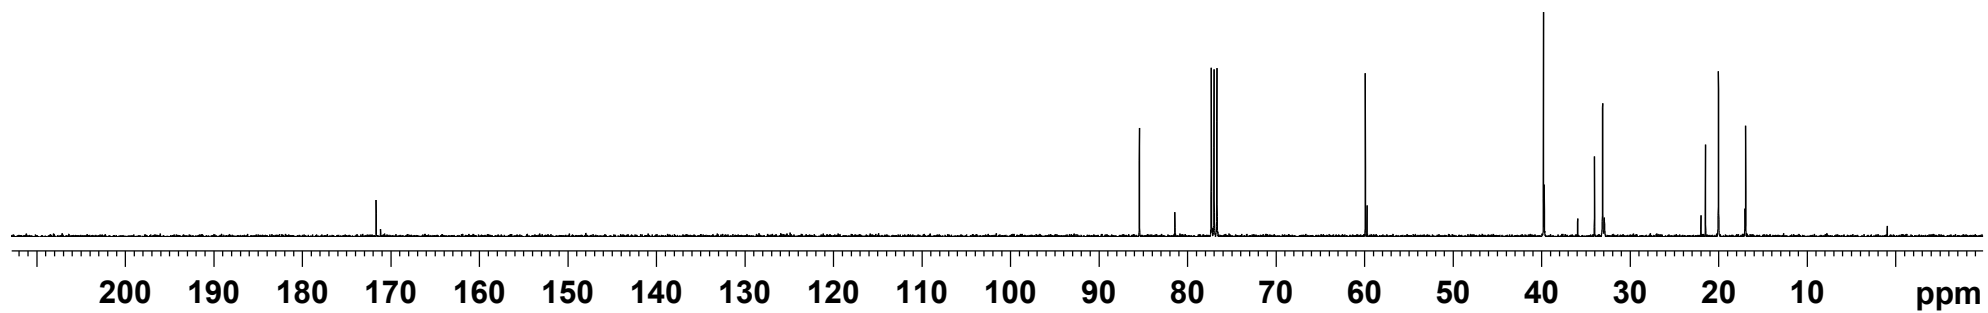

Supplement: c4cc08797f1.pdf [file c4cc08797f1.pdf]
